# Supplementary material for: 4-Vinylbenzodioxinones as a new type of precursor for palladium-catalyzed (4+3) cycloaddition of azomethine imines
Source: Royal Society of Chemistry journal article supplement (doi:10.1039/d3cc06012h), 2024-01-01
Supplement: d3cc06012h1.pdf [file d3cc06012h1.pdf]

Electronic Supplementary Information

# 4-Vinylbenzodioxinones as A New Type of Precursor for Palladium-Catalyzed (4+3) Cycloaddition of Azomethine Imines

Yi Tang,<sup>a</sup> Rulei Zhang,<sup>a</sup> Yujie Dong,<sup>a</sup> Songcheng Yu,<sup>b</sup> Yongjun Wu,<sup>b</sup> Yumei Xiao,<sup>a</sup> and  
Hongchao Guo<sup>\*a</sup>

<sup>a</sup> Department of Chemistry and Innovation Center of Pesticide Research, China Agricultural University, Beijing 100193, P. R. China

<sup>b</sup> College of Public Health, Zhengzhou University, Zhengzhou 450001, P. R. China

Email: hchguo@cau.edu.cn

## Contents

|                                                                        |     |
|------------------------------------------------------------------------|-----|
| General Information .....                                              | S2  |
| General Procedure for Preparation of Substrates .....                  | S2  |
| Optimization of Reaction Conditions .....                              | S4  |
| General Procedure for (4+3) Cycloaddition Reaction .....               | S6  |
| The Scaled-up Reaction .....                                           | S6  |
| Further Transformation of the Product .....                            | S7  |
| Characterization Data for New Substrates and All Products .....        | S8  |
| <sup>1</sup> H and <sup>13</sup> C NMR Spectra of New Substrates ..... | S34 |
| <sup>1</sup> H and <sup>13</sup> C NMR Spectra of All Products .....   | S51 |
| HPLC Chromatograms of All Products .....                               | S87 |
| X-Ray Crystallographic Data .....                                      | S96 |

## General Information

All reactions were performed under an Argon atmosphere in oven-dried glassware with magnetic stirring. Unless otherwise stated, all reagents were purchased from commercial suppliers and used without further purification. All solvents were purified and dried according to standard methods prior to use. Organic solutions were concentrated under reduced pressure using a rotary evaporator or oil pump. Reactions were monitored through thin-layer chromatography (TLC) on silica gel–precoated glass plates. Visualization on TLC was achieved by use of UV light (254 nm), iodine or basic  $\text{KMnO}_4$  indicator. Flash column chromatography was performed using Qingdao Haiyang flash silica gel (200–300 mesh). Infrared spectra were recorded using a Bruker Optics TENSOR 27 instrument.  $^1\text{H}$  and  $^{13}\text{C}$  NMR spectra were recorded in  $\text{CDCl}_3$  using a Bruker 300 MHz, 400 MHz and 500 MHz of NMR instrument (referenced internally to  $\text{Me}_4\text{Si}$ ). Chemical shifts ( $\delta$ , ppm) are relative to tetramethylsilane (TMS) with the resonance of the non-deuterated solvent or TMS as the internal standard.  $^1\text{H}$  NMR data are reported as follows: chemical shift, multiplicity (s = singlet; d = doublet; t = triplet; q = quartet; p = pentet; dd = doublet of doublets; td = triplet of doublets; dt = doublet of triplets; dq = doublet of quartets; ddd = doublet of doublet of doublets; m = multiplet; br = broad), coupling constant (Hz), and integral. Data for  $^{13}\text{C}$  NMR spectra are reported in terms of chemical shift. HRMS analyses were carried out on a Thermo Q-Exactive high resolution mass spectrometer (Thermo Scientific, Waltham, MA, USA) apparatus. The type of mass analyzer used for HRMS measurement is TOF. Data were analyzed using instrument-supplied software Xcalibur Qual Browser. X-ray crystallographic data were collected using a Bruker SMART CCD-based diffractometer equipped with a low-temperature apparatus operated at 173.15 K. In addition, unless noted otherwise, in the reactions that need heating, the heat source is oil bath.

## General Procedure for Preparation of Substrates

### Preparation of 4-Vinylbenzodioxinones **1**

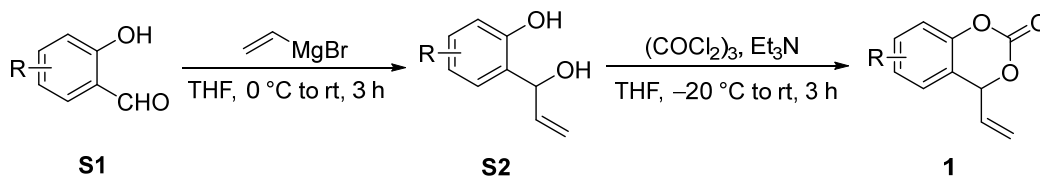

To a solution of Substituted 2-hydroxybenzaldehyde **S1** (1 equiv., 8 mmol) in THF (16 mL) was added vinylmagnesium bromide (1.0 M in THF, 2.0 equiv.) at 0 °C. The reaction mixture was stirred at room temperature under Ar atmosphere for 3 h, and then the reaction was quenched with saturated aqueous NH<sub>4</sub>Cl. The resulting mixture was transferred to the separating funnel and separated. The obtained aqueous layer was extracted with ethyl acetate (5 mL×3) for three times. The combined organic layers were washed by brine, dried over anhydrous Na<sub>2</sub>SO<sub>4</sub>, filtered and concentrated. The residue was purified by flash chromatography on silica to afford corresponding diols **S2**.

To a solution of diol **S2** (1 equiv.) and Et<sub>3</sub>N (3 equiv.) in THF (0.5 M) was added triphosgene (0.67 equiv, 0.5 M in THF) at -20 °C. The reaction was stirred under Ar atmosphere at room temperature for 3 h. The reaction mixture was then quenched with saturated aqueous NH<sub>4</sub>Cl, and extracted with ethyl acetate (5 mL×3) for three times. The combined organic layers were dried over anhydrous Na<sub>2</sub>SO<sub>4</sub>, filtered and concentrated. The residue was purified by flash chromatography on silica to afford corresponding product **1a–1q** in 8–76% yield. The <sup>1</sup>H, <sup>13</sup>C-NMR spectra of the products were in accordance with the Supporting Information

### Preparation of C, N-Cyclic Aomethine Imines 2

The C, N-cyclic aomethine imines were synthesized using known literature procedures.<sup>1</sup>

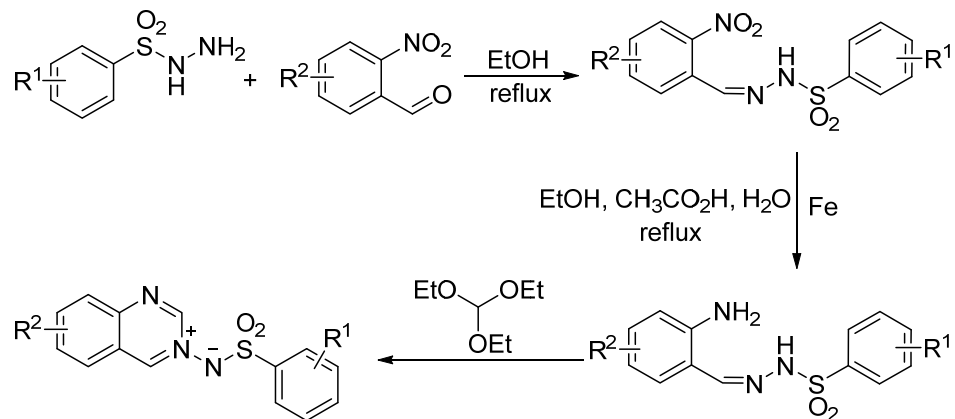

1 (a) T. Wang, J. Luo, C. Gu, R. Li, X. Tang, D. Yu, J. Li, CN 103172575A. (b) T. Wang, A.-L. Shao, H.-Y. Feng, S.-W. Yang, M. Gao, J. Tian, A.-W. Lei, *Tetrahedron*, 2015, **71**, 4473–4477. (c) X. Zhang, C. Yuan, C. Zhang, X. Gao, B. Wang, Z. Sun, Y. Xiao, H. Guo, *Tetrahedron*, 2016, **72**, 8274–8281. (d) X. Wang, Z. Li, C. Feng, Q. Zhen, M. Guo, Y. Yao, X. Zou, P Wang, Y. Hou, P. Gong, *Synlett*, 2021, **32**, 2090–2096.

## Optimization of Reaction Conditions for Diastereoselective and Enantioselective (4+3) Cycloaddition

Initially, the reaction of 4-vinylbenzodioxinone **1a** and C, N-cyclic azomethine imine **2a** was chosen as the model reaction for optimization of the reaction conditions (Table S1). With the use of Pd<sub>2</sub>(dba)<sub>3</sub>·CHCl<sub>3</sub> as the catalyst, various ligands were first screened. Except 1,10-phen (entry 6), other monophosphine and diphosphine ligands exhibited certain catalytic activities, leading to (4+3) cycloaddition product **3aa** in 33–91% yields with 5:1 to >20:1 dr (entries 1–5). According to the results, XantPhos was a nice choice in terms of diastereoselectivity (entry 2). Using XantPhos as the ligand, we next tried to increase yield of the reaction through screening the ratio of palladium catalyst to ligand, reaction time and solvent (entries 7–14). Reducing the amount of ligand could increase the yield to 65% and the dr value was still >20:1 (entry 8 vs entries 2 and 7). Lengthening the reaction time from 12 hours to 24 hours slightly increased the yield from 65% to 69% (entry 9). Subsequently, several solvents such as CHCl<sub>3</sub>, 1,2-dichloroethane (DCE), toluene, THF and 1,4-dioxane were screened (entries 10–14). Among these solvents, DCE showed the best compatibility, resulting in the product **3aa** in 88% yield with >20:1 dr (entry 14). When the reaction was performed at 2 mmol of scale, the product still was generated in 73% yield with >20:1 dr under standard reaction conditions.

**Table S1.** Optimization of Reaction Conditions for Diastereoselective (4+3) Cycloaddition<sup>a</sup>

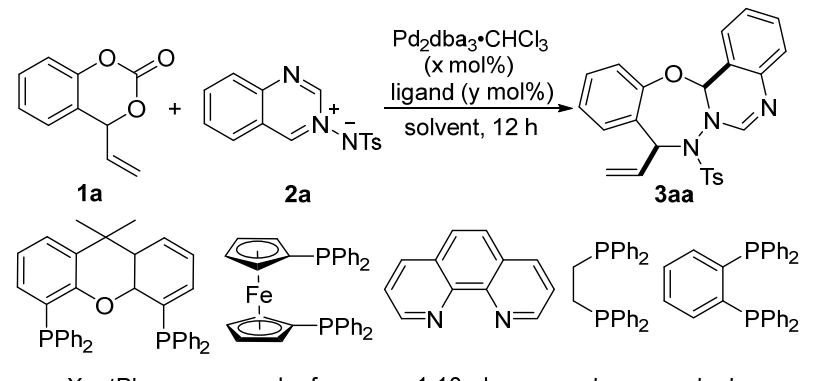

| entry           | ligand           | x:y     | solvent                         | yield (%) <sup>b</sup> | dr <sup>c</sup> |
|-----------------|------------------|---------|---------------------------------|------------------------|-----------------|
| 1               | PPh <sub>3</sub> | 2.5:10  | CH <sub>2</sub> Cl <sub>2</sub> | 91                     | 5:1             |
| 2               | XantPhos         | 2.5:10  | CH <sub>2</sub> Cl <sub>2</sub> | 54                     | >20:1           |
| 3               | dppf             | 2.5:10  | CH <sub>2</sub> Cl <sub>2</sub> | 33                     | 6:1             |
| 4               | dppbz            | 2.5:10  | CH <sub>2</sub> Cl <sub>2</sub> | 47                     | 8:1             |
| 5               | dppe             | 2.5:10  | CH <sub>2</sub> Cl <sub>2</sub> | 48                     | 6:1             |
| 6               | 1,10-phen        | 2.5:10  | CH <sub>2</sub> Cl <sub>2</sub> | trace                  | —               |
| 7               | XantPhos         | 5.0:10  | CH <sub>2</sub> Cl <sub>2</sub> | 42                     | >20:1           |
| 8               | XantPhos         | 2.5:5.0 | CH <sub>2</sub> Cl <sub>2</sub> | 65                     | >20:1           |
| 9 <sup>d</sup>  | XantPhos         | 2.5:5.0 | CH <sub>2</sub> Cl <sub>2</sub> | 69                     | >20:1           |
| 10 <sup>d</sup> | XantPhos         | 2.5:5.0 | toluene                         | 38                     | 3:1             |
| 11 <sup>d</sup> | XantPhos         | 2.5:5.0 | THF                             | 56                     | 6:1             |
| 12 <sup>d</sup> | XantPhos         | 2.5:5.0 | 1,4-dioxane                     | trace                  | —               |
| 13 <sup>d</sup> | XantPhos         | 2.5:5.0 | CHCl <sub>3</sub>               | 82                     | >20:1           |
| 14 <sup>d</sup> | XantPhos         | 2.5:5.0 | DCE                             | 88                     | >20:1           |

<sup>a</sup> Unless otherwise stated, reactions of **1a** (0.12 mmol) and **2a** (0.1 mmol) were performed at 25 °C in the presence of Pd<sub>2</sub>(dba)<sub>3</sub>·CHCl<sub>3</sub> and ligand in 1 mL of solvent for 12 h. <sup>b</sup> Isolated yield. <sup>c</sup> Determined by <sup>1</sup>HNMR analysis. <sup>d</sup> The reaction was carried out for 24 h.

**Table S2.** Exploration of Reaction Conditions for Enantioselective (4+3) Cycloaddition<sup>a</sup>

| entry | R in <b>1</b> | ligand     | solvent                         | T/°C | t/h | <b>3aa</b> yield (%) <sup>b</sup> | ee (%) <sup>c</sup> |
|-------|---------------|------------|---------------------------------|------|-----|-----------------------------------|---------------------|
| 1     | H             | <b>L1</b>  | CH <sub>2</sub> Cl <sub>2</sub> | 25   | 12  | 88                                | 5                   |
| 2     | H             | <b>L2</b>  | CH <sub>2</sub> Cl <sub>2</sub> | 25   | 12  | 56                                | 20                  |
| 3     | H             | <b>L3</b>  | CH <sub>2</sub> Cl <sub>2</sub> | 25   | 12  | 46                                | 21                  |
| 4     | H             | <b>L4</b>  | CH <sub>2</sub> Cl <sub>2</sub> | 25   | 12  | 32                                | -10                 |
| 5     | H             | <b>L5</b>  | CH <sub>2</sub> Cl <sub>2</sub> | 25   | 12  | trace                             | /                   |
| 6     | H             | <b>L6</b>  | CH <sub>2</sub> Cl <sub>2</sub> | 25   | 12  | trace                             | /                   |
| 7     | H             | <b>L7</b>  | CH <sub>2</sub> Cl <sub>2</sub> | 25   | 12  | trace                             | /                   |
| 8     | H             | <b>L8</b>  | CH <sub>2</sub> Cl <sub>2</sub> | 25   | 12  | 43                                | 20                  |
| 9     | H             | <b>L9</b>  | CH <sub>2</sub> Cl <sub>2</sub> | 25   | 12  | 18                                | -11                 |
| 10    | H             | <b>L10</b> | CH <sub>2</sub> Cl <sub>2</sub> | 25   | 12  | 31                                | 7                   |
| 11    | H             | <b>L11</b> | CH <sub>2</sub> Cl <sub>2</sub> | 25   | 12  | 25                                | 8                   |
| 12    | H             | <b>L12</b> | CH <sub>2</sub> Cl <sub>2</sub> | 25   | 12  | 35                                | -19                 |
| 13    | H             | <b>L13</b> | CH <sub>2</sub> Cl <sub>2</sub> | 25   | 12  | 46                                | 4                   |
| 14    | H             | <b>L14</b> | CH <sub>2</sub> Cl <sub>2</sub> | 25   | 12  | 35                                | -11                 |
| 15    | H             | <b>L15</b> | CH <sub>2</sub> Cl <sub>2</sub> | 25   | 12  | 76                                | 58                  |
| 16    | H             | <b>L16</b> | CH <sub>2</sub> Cl <sub>2</sub> | 25   | 12  | trace                             | /                   |
| 17    | H             | <b>L17</b> | CH <sub>2</sub> Cl <sub>2</sub> | 25   | 12  | 83                                | 59                  |
| 18    | H             | <b>L18</b> | CH <sub>2</sub> Cl <sub>2</sub> | 25   | 12  | 40                                | 33                  |
| 19    | H             | <b>L19</b> | CH <sub>2</sub> Cl <sub>2</sub> | 25   | 12  | trace                             | /                   |
| 20    | H             | <b>L17</b> | DCE                             | 25   | 12  | 83                                | 67                  |
| 21    | H             | <b>L17</b> | CHCl <sub>3</sub>               | 25   | 12  | 95                                | 36                  |
| 22    | H             | <b>L17</b> | toluene                         | 25   | 12  | messy                             | /                   |
| 23    | H             | <b>L17</b> | THF                             | 25   | 12  | messy                             | /                   |
| 24    | H             | <b>L17</b> | DCE                             | 0    | 24  | 85                                | 73                  |
| 25    | 8-OEt         | <b>L17</b> | DCE                             | 0    | 24  | 90                                | 92                  |
| 26    | 8-OEt         | <b>L17</b> | DCE                             | -20  | 24  | 98                                | 94                  |

<sup>a</sup> Unless noted otherwise, the reaction of **1** (0.12 mmol), **2a** (0.1 mmol), Pd<sub>2</sub>dba<sub>3</sub>·CHCl<sub>3</sub> (5 mol%) and ligand (10 mol% for phosphoramidite, 5.0 mol% for diphosphines) was performed in 1.0 mL of solvent under indicated reaction conditions. <sup>b</sup> Isolated yield. <sup>c</sup> Determined by chiral HPLC analysis.

## General Procedure for (4+3) Cycloaddition Reaction

### General Procedure for Diastereoselective (4+3) Cycloaddition Reactions

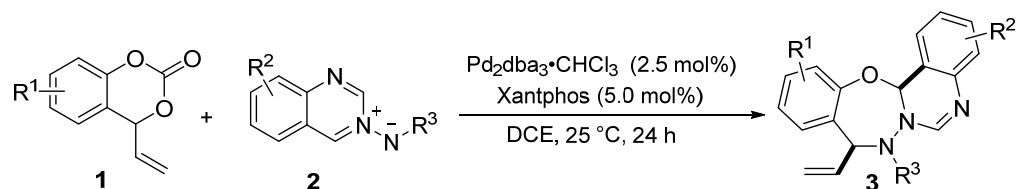

An oven-dried 10 mL of Schlenk tube was charged with 4-vinylbenzodioxinones **1** (0.12 mmol), azomethine imines **2** (0.1 mmol), Pd<sub>2</sub>dba<sub>3</sub>·CHCl<sub>3</sub> (0.025 equiv., 2.6 mg), Xantphos (0.05 equiv., 2.9 mg) in 1 mL of DCE under Ar atmosphere at 25 °C. Once the starting material was completely consumed (monitored by TLC), the mixture was concentrated to dryness. The residue was purified by flash column chromatography to afford the product **3** (petroleum ether/EtOAc as the eluent).

### General Procedure for enantioselective (4+3) Cycloaddition Reactions

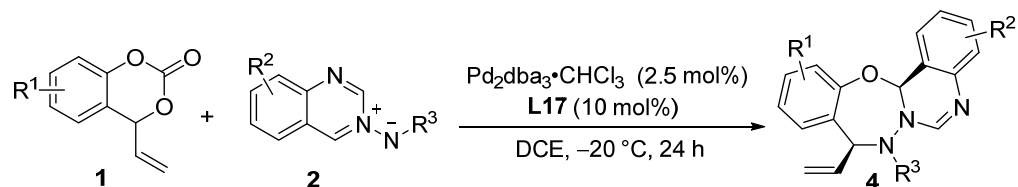

An oven-dried 10 mL of Schlenk tube was charged with 4-vinylbenzodioxinones **1** (0.12 mmol), azomethine imines **2** (0.1 mmol), Pd<sub>2</sub>dba<sub>3</sub>·CHCl<sub>3</sub> (0.025 equiv, 2.6 mg), **L17** (0.1 equiv., 7.6 mg) in 1 mL of DCE under Ar atmosphere at -20 °C. Once the starting material was completely consumed (monitored by TLC), the mixture was concentrated to dryness. The residue was purified by flash column chromatography to afford the product **4** (petroleum ether/EtOAc as the eluent).

### The Scaled-up Reaction

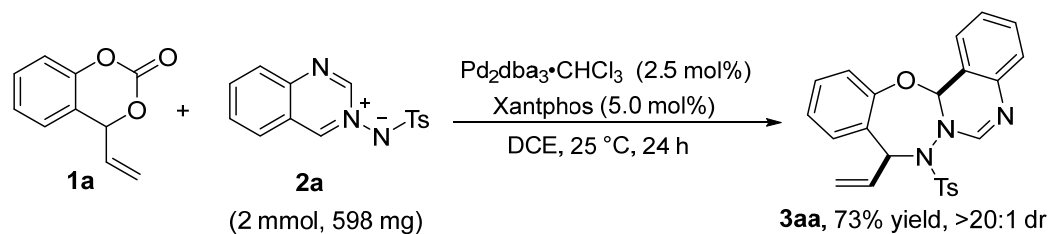

An oven-dried 100 mL of Schlenk tube was charged with 4-vinylbenzodioxinone **1a** (423 mg, 2.4 mmol), azomethine imines **2a** (598 mg, 2.0 mmol), Pd<sub>2</sub>dba<sub>3</sub>·CHCl<sub>3</sub> (0.025 equiv, 52 mg), Xantphos (0.05 equiv, 58 mg) in 20 mL of DCE under Ar atmosphere at 25 °C. Once the starting material was completely consumed (monitored by TLC), the mixture was concentrated to dryness. The residue was purified by flash column chromatography (petroleum ether/EtOAc as the eluent) to afford the product **3aa** (630 mg, 73% yield, >20:1 dr).

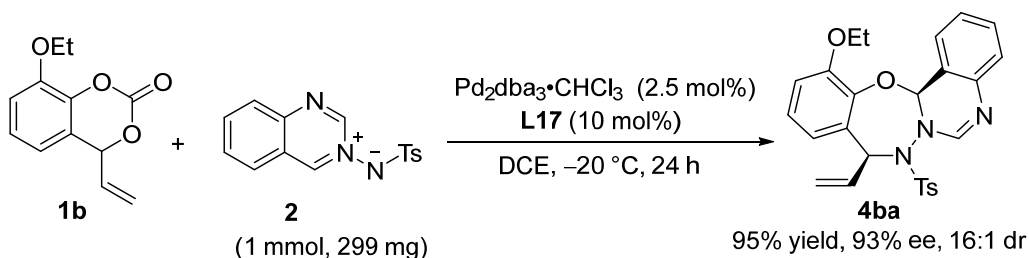

An oven-dried 100 mL of Schlenk tube was charged with 4-vinylbenzodioxinones **1b** (264 mg, 1.2 mmol), azomethine imine **2a** (299 mg, 1.0 mmol), Pd<sub>2</sub>dba<sub>3</sub>·CHCl<sub>3</sub> (0.025 equiv., 26 mg), **L17** (0.1 equiv., 76 mg) in 10 mL of DCE under Ar atmosphere at -20 °C. Once the starting material was completely consumed (monitored by TLC), the mixture was concentrated to dryness. The residue was purified by flash column chromatography (petroleum ether/EtOAc as the eluent) to afford the product **4ba** (452 mg, 95% yield, 93% ee, 16:1 dr).

#### Further Transformation of the Product 3aa

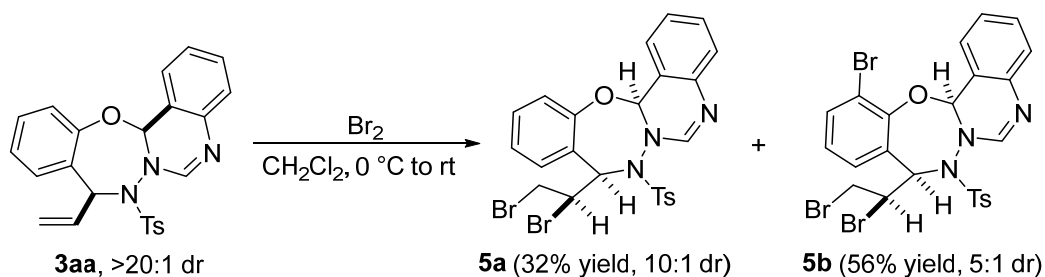

An oven-dried 10 mL of Schlenk tube was charged with the product **3aa** (43.1 mg, 0.1 mmol), at 0 °C, a solution of Br<sub>2</sub> in DCM (0.6 M in DCM, 5.0 equiv) was added. The reaction was stirred at ambient temperature for 2 h. Upon full conversion, the mixture was concentrated and then purified through flash column chromatography (20% EtOAc/PE) to afford the corresponding product **5a** as a white solid (18.9 mg, 32% yield, 10:1 dr) and **5b** as a white solid (37.4 mg, 56% yield, 5:1 dr).

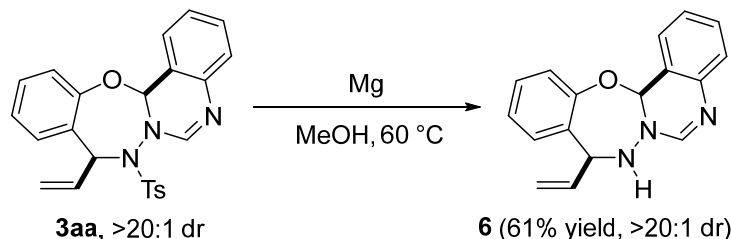

An oven-dried 10 mL of Schlenk tube was charged with the product **3aa** (43.1 mg, 0.1 mmol, > 20:1 dr), Mg (240 mg, 10 mmol, 200-300 mesh), and anhydrous MeOH (3 mL) under argon atmosphere. The resulting solution was heated at 60 °C for 1 h. Then NH<sub>4</sub>Cl (2 mL) was added to the reaction mixture to quench excess magnesium powder. The aqueous phase was extracted with ethyl acetate (3×3 mL). The combined organic layers were dried over Na<sub>2</sub>SO<sub>4</sub>, filtered and concentrated in vacuo. Then the mixture was purified through flash column chromatography (74% EtOAc/PE) to afford the corresponding product **6** as a light yellow solid (16.9 mg, 61% yield, > 20:1 dr).

## Characterization Data for New Substrates and All Products

### 4-vinyl-4H-benzo[d][1,3]dioxin-2-one (1a)

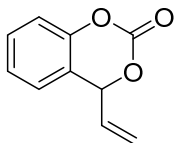

**1a**

Prepared according to the general procedure as described above in 53% yield. It was purified by flash chromatography (5% EtOAc/PE) to afford a yellow oil;  $^1\text{H}$  NMR (500 MHz,  $\text{CDCl}_3$ )  $\delta$  7.39 (td,  $J = 7.8, 1.6$  Hz, 1H), 7.23 (td,  $J = 7.5, 1.1$  Hz, 1H), 7.16 (dd,  $J = 7.6, 1.9$  Hz, 1H), 7.11 (dd,  $J = 8.2, 1.1$  Hz, 1H), 6.05 (ddd,  $J = 17.0, 10.3, 6.6$  Hz, 1H), 5.89 (d,  $J = 6.6$  Hz, 1H), 5.49 (d,  $J = 10.3$  Hz, 1H), 5.42 (dd,  $J = 17.0, 1.2$  Hz, 1H);  $^{13}\text{C}$  NMR (126 MHz,  $\text{CDCl}_3$ )  $\delta$  148.8, 146.5, 133.1, 130.2, 125.3, 125.1, 121.0, 119.8, 116.3, 80.2; IR (thin film)  $\nu_{\text{max}}$  1766, 1489, 1458, 1274, 1261, 1216, 1153, 1032, 942, 751, 468  $\text{cm}^{-1}$ ; HRMS (ESI) calculated for  $\text{C}_{10}\text{H}_9\text{O}_3^+$   $[\text{M} + \text{H}]^+$  177.0546, found 177.0547.

### 8-ethoxy-4-vinyl-4H-benzo[d][1,3]dioxin-2-one (1b)

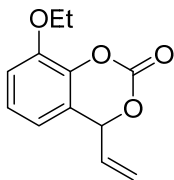

**1b**

Prepared according to the general procedure as described above in 56% yield. It was purified by flash chromatography (5% EtOAc/PE) to afford a red solid. Melting point: 46–47  $^{\circ}\text{C}$ ;  $^1\text{H}$  NMR (500 MHz,  $\text{CDCl}_3$ )  $\delta$  7.13 (t,  $J = 8.0$  Hz, 1H), 6.94 (dd,  $J = 8.3, 1.4$  Hz, 1H), 6.69 (d,  $J = 7.6$  Hz, 1H), 6.03 (ddd,  $J = 16.9, 10.3, 6.5$  Hz, 1H), 5.84 (d,  $J = 6.5$  Hz, 1H), 5.46 (d,  $J = 10.3$  Hz, 1H), 5.41 (dd,  $J = 17.0, 1.2$  Hz, 1H), 4.13 (q,  $J = 7.0$  Hz, 2H), 1.47 (t,  $J = 7.0$  Hz, 3H);  $^{13}\text{C}$  NMR (126 MHz,  $\text{CDCl}_3$ )  $\delta$  146.60, 146.42, 138.23, 133.13, 125.37, 120.98, 120.70, 116.02, 113.90, 80.13, 64.92, 14.70; IR (thin film)  $\nu_{\text{max}}$  1769, 1489, 1473, 1279, 1221, 1151, 1113, 1081, 1022, 944, 749  $\text{cm}^{-1}$ ; HRMS (ESI) calculated for  $\text{C}_{12}\text{H}_{13}\text{O}_4^+$   $[\text{M} + \text{H}]^+$  221.0808, found 221.0805.



**7-methoxy-4-vinyl-4H-benzo[d][1,3]dioxin-2-one (1c)**

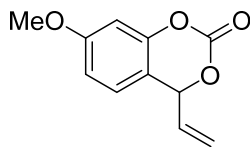

**1c**

Prepared according to the general procedure as described above in 76% yield. It was purified by flash chromatography (5% EtOAc/PE) to afford a brown solid. Melting point: 35–36 °C; <sup>1</sup>H NMR (500 MHz, CDCl<sub>3</sub>) δ 6.97 (d, *J* = 8.9 Hz, 1H), 6.82 (dd, *J* = 8.9, 2.9 Hz, 1H), 6.56 (dd, *J* = 2.9, 0.8 Hz, 1H), 5.96 (ddd, *J* = 17.0, 10.3, 6.6 Hz, 1H), 5.76 (d, *J* = 6.6 Hz, 1H), 5.42 (dt, *J* = 10.2, 0.8 Hz, 1H), 5.36 (dt, *J* = 16.9, 0.9 Hz, 1H), 3.73 (s, 3H); <sup>13</sup>C NMR (126 MHz, CDCl<sub>3</sub>) δ 155.8, 145.7, 141.5, 131.9, 120.0, 119.6, 116.2, 114.3, 108.9, 79.2, 54.8; IR (thin film)  $\nu_{\max}$  1770, 1497, 1433, 1259, 1225, 1163, 1034, 817, 764 cm<sup>-1</sup>; HRMS (ESI) calculated for C<sub>11</sub>H<sub>11</sub>O<sub>4</sub><sup>+</sup> [M + H]<sup>+</sup> 207.0652, found 207.0652.

**6-methoxy-4-vinyl-4H-benzo[d][1,3]dioxin-2-one (1d)**

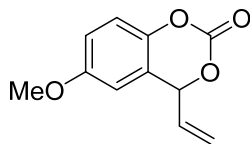

**1d**

Prepared according to the general procedure as described above in 68% yield. It was purified by flash chromatography (5% EtOAc/PE) to afford a brown solid. Melting point: 33–34 °C; <sup>1</sup>H NMR (500 MHz, CDCl<sub>3</sub>) δ 7.05 (d, *J* = 8.9 Hz, 0H), 6.89 (dd, *J* = 9.0, 2.9 Hz, 0H), 6.64 (d, *J* = 2.9 Hz, 0H), 6.04 (ddd, *J* = 17.0, 10.3, 6.6 Hz, 0H), 5.83 (d, *J* = 6.6 Hz, 0H), 5.49 (d, *J* = 10.3 Hz, 0H), 5.44 (d, *J* = 17.2 Hz, 0H), 3.80 (s, 1H); <sup>13</sup>C NMR (126 MHz, CDCl<sub>3</sub>) δ 189.5, 145.3, 143.5, 137.2, 134.6, 131.7, 130.6, 128.9, 128.8, 128.0, 127.6, 127.6, 127.5, 127.5, 123.5, 121.7, 118.3, 97.6, 83.8; IR (thin film)  $\nu_{\max}$  1768, 1496, 1432, 1259, 1224, 1162, 1033, 817, 765 cm<sup>-1</sup>; HRMS (ESI) calculated for C<sub>11</sub>H<sub>11</sub>O<sub>4</sub><sup>+</sup> [M + H]<sup>+</sup> 207.0652, found 207.0653.

**8-methyl-4-vinyl-4H-benzo[d][1,3]dioxin-2-one (1e)**

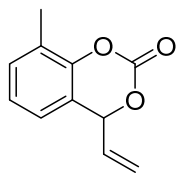

**1e**

Prepared according to the general procedure as described above in 27% yield. It was purified by flash chromatography (5% EtOAc/PE) to afford a white solid. Melting point: 78–79 °C; <sup>1</sup>H NMR (500 MHz, CDCl<sub>3</sub>) δ 7.17 – 7.11 (m, 1H), 7.03 (t, *J* = 7.6 Hz, 1H), 6.92 – 6.85 (m, 1H), 5.97 (ddd, *J* = 17.0, 10.3, 6.5 Hz, 1H), 5.77 (d, *J* = 6.5 Hz, 1H), 5.39 (dt, *J* = 10.4, 0.9 Hz, 1H), 5.33 (dt, *J* = 17.0, 0.9 Hz, 1H), 2.27 (s, 3H); <sup>13</sup>C NMR (126 MHz, CDCl<sub>3</sub>) δ 146.1, 145.8, 132.2, 130.6, 125.0, 123.8, 121.4, 119.6, 118.6, 79.1, 14.0; IR (thin film)  $\nu_{\max}$  1770, 1473, 1219, 1162, 1089, 1027, 943, 790, 755 cm<sup>-1</sup>; HRMS (ESI) calculated for C<sub>11</sub>H<sub>11</sub>O<sub>3</sub><sup>+</sup> [M + H]<sup>+</sup> 191.0703, found 191.0702.

**7-methyl-4-vinyl-4H-benzo[d][1,3]dioxin-2-one (1f)**

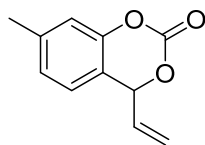

**1f**

Prepared according to the general procedure as described above in 20% yield. It was purified by flash chromatography (5% EtOAc/PE) to afford a yellow oil; <sup>1</sup>H NMR (500 MHz, CDCl<sub>3</sub>) δ 6.98 – 6.90 (m, 2H), 6.85 (s, 1H), 6.06 – 5.88 (m, 1H), 5.77 (d, *J* = 6.6 Hz, 1H), 5.39 (d, *J* = 10.2 Hz, 1H), 5.33 (d, *J* = 17.0 Hz, 1H), 2.31 (s, 3H); <sup>13</sup>C NMR (126 MHz, CDCl<sub>3</sub>) δ 148.8, 146.7, 140.9, 133.3, 126.0, 124.7, 120.7, 116.7, 116.6, 80.3, 21.3; IR (thin film)  $\nu_{\max}$  1780, 1415, 1259, 1155, 1016, 984, 807, 764, 750 cm<sup>-1</sup>; HRMS (ESI) calculated for C<sub>11</sub>H<sub>11</sub>O<sub>3</sub><sup>+</sup> [M + H]<sup>+</sup> 191.0703, found 191.0699.

**6-methyl-4-vinyl-4H-benzo[d][1,3]dioxin-2-one (1g)**

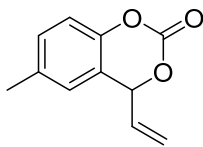

**1g**

Prepared according to the general procedure as described above in 40% yield. It was purified by flash chromatography (5% EtOAc/PE) to afford a white solid. Melting point: 44–45 °C; <sup>1</sup>H NMR (500 MHz, CDCl<sub>3</sub>) δ 7.07 (dd, *J* = 8.4, 2.1 Hz, 1H), 6.89 (d, *J* = 8.3 Hz, 1H), 6.84 (d, *J* = 2.1 Hz, 1H), 5.93 (ddd, *J* = 17.0, 10.3, 6.6 Hz, 1H), 5.74 (d, *J* = 6.7 Hz, 1H), 5.37 (d, *J* = 10.3 Hz, 1H), 5.33 (d, *J* = 16.9 Hz, 1H), 2.25 (s, 3H); <sup>13</sup>C NMR (126 MHz, CDCl<sub>3</sub>) δ 145.7, 145.6, 134.2, 132.2, 129.6, 124.3, 119.7, 118.4, 114.9, 79.3, 19.8; IR (thin film)  $\nu_{\max}$  1769, 1496, 1227, 1167, 1152, 1126, 1027, 815, 764 cm<sup>-1</sup>; HRMS (ESI) calculated for C<sub>11</sub>H<sub>10</sub>O<sub>3</sub><sup>+</sup> [M + H]<sup>+</sup> 191.0703, found 191.0702.

**6-(tert-butyl)-4-vinyl-4H-benzo[d][1,3]dioxin-2-one (1h)**

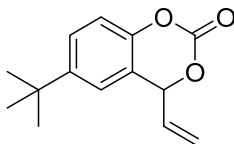

**1h**

Prepared according to the general procedure as described above in 68% yield. It was purified by flash chromatography (5% EtOAc/PE) to afford a yellow oil; <sup>1</sup>H NMR (500 MHz, CDCl<sub>3</sub>) δ 7.31 (dd, *J* = 8.6, 2.4 Hz, 1H), 7.04 (d, *J* = 2.4 Hz, 1H), 6.95 (d, *J* = 8.6 Hz, 1H), 5.97 (ddd, *J* = 16.9, 10.3, 6.5 Hz, 1H), 5.79 (d, *J* = 6.6 Hz, 1H), 5.40 (d, *J* = 10.3 Hz, 1H), 5.35 (dd, *J* = 17.0, 1.1 Hz, 1H), 1.23 (s, 9H); <sup>13</sup>C NMR (126 MHz, CDCl<sub>3</sub>) δ 148.7, 146.8, 146.6, 133.3, 127.2, 121.7, 120.8, 119.1, 115.7, 80.6, 34.6, 31.4; IR (thin film)  $\nu_{\max}$  2961, 1771, 1498, 1273, 1235, 1158, 1131, 1025, 823, 763 cm<sup>-1</sup>; HRMS (ESI) calculated for C<sub>14</sub>H<sub>17</sub>O<sub>3</sub><sup>+</sup> [M + H]<sup>+</sup> 233.1172, found 233.1171.

**7-fluoro-4-vinyl-4H-benzo[d][1,3]dioxin-2-one (1i)**

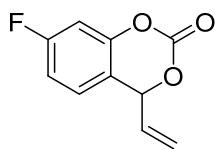

**1i**

Prepared according to the general procedure as described above in 21% yield. It was purified by flash chromatography (5% EtOAc/PE) to afford a yellow oil;  $^1\text{H}$  NMR (500 MHz,  $\text{CDCl}_3$ )  $\delta$  7.05 (dd,  $J = 8.5, 5.7$  Hz, 1H), 6.88 (td,  $J = 8.4, 2.5$  Hz, 1H), 6.80 (dd,  $J = 8.6, 2.5$  Hz, 1H), 5.96 (ddd,  $J = 17.0, 10.3, 6.7$  Hz, 1H), 5.79 (d,  $J = 6.7$  Hz, 1H), 5.44 (d,  $J = 10.3$  Hz, 1H), 5.36 (dd,  $J = 17.1, 1.1$  Hz, 1H);  $^{13}\text{C}$  NMR (126 MHz,  $\text{CDCl}_3$ )  $\delta$  163.2 (C-F,  $^1J_{\text{C-F}} = 250.0$  Hz), 149.7 (C-F,  $^2J_{\text{C-F}} = 12.4$  Hz), 145.8, 132.8, 126.4 (C-F,  $^3J_{\text{C-F}} = 9.8$  Hz), 121.4, 115.8 (C-F,  $^1J_{\text{C-F}} = 3.4$  Hz), 112.6 (C-F,  $^2J_{\text{C-F}} = 22.4$  Hz), 104.5 (C-F,  $^2J_{\text{C-F}} = 26.0$  Hz), 80.1;  $^{19}\text{F}$  NMR (471 MHz,  $\text{CDCl}_3$ )  $\delta$  -114.28; IR (thin film)  $\nu_{\text{max}}$  1599, 1497, 1274, 1261, 1152, 1099, 972, 835, 764, 749  $\text{cm}^{-1}$ ; HRMS (ESI) calculated for  $\text{C}_{10}\text{H}_8\text{FO}_3^+$   $[\text{M} + \text{H}]^+$  195.0452, found 195.0451.

**6-fluoro-4-vinyl-4H-benzo[d][1,3]dioxin-2-one (1j)**

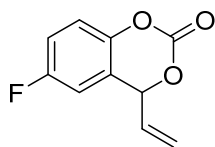

**1j**

Prepared according to the general procedure as described above in 26% yield. It was purified by flash chromatography (5% EtOAc/PE) to afford a white solid. Melting point: 37–38 °C.  $^1\text{H}$  NMR (500 MHz,  $\text{CDCl}_3$ )  $\delta$  7.28 (dd,  $J = 8.7, 2.4$  Hz, 1H), 7.07 (d,  $J = 2.4$  Hz, 1H), 7.00 (d,  $J = 8.7$  Hz, 1H), 5.95 (ddd,  $J = 17.0, 10.3, 6.7$  Hz, 1H), 5.78 (d,  $J = 6.8$  Hz, 1H), 5.47 (d,  $J = 10.3$  Hz, 1H), 5.39 (d,  $J = 17.0$  Hz, 1H);  $^{13}\text{C}$  NMR (126 MHz,  $\text{CDCl}_3$ )  $\delta$  159.4 (C-F,  $^1J_{\text{C-F}} = 245.8$  Hz), 146.1, 144.8 (C-F,  $^3J_{\text{C-F}} = 2.7$  Hz), 132.4, 121.7, 121.4 (C-F,  $^3J_{\text{C-F}} = 7.9$  Hz), 117.9 (C-F,  $^3J_{\text{C-F}} = 8.3$  Hz), 117.1 (C-F,  $^2J_{\text{C-F}} = 23.8$  Hz), 112.0 (C-F,  $^2J_{\text{C-F}} = 25.5$  Hz), 79.8 (C-F,  $^3J_{\text{C-F}} = 2.3$  Hz);  $^{19}\text{F}$  NMR (471 MHz,  $\text{CDCl}_3$ )  $\delta$  -115.78; IR (thin film)  $\nu_{\text{max}}$  1770, 1482, 1259, 1213, 1158, 1109, 1030, 820, 761  $\text{cm}^{-1}$ ; HRMS (ESI) calculated for  $\text{C}_{10}\text{H}_8\text{FO}_3^+$   $[\text{M} + \text{H}]^+$  195.0452, found 195.0453.

### 5-fluoro-4-vinyl-4H-benzo[d][1,3]dioxin-2-one (1k)

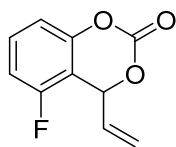

**1k**

Prepared according to the general procedure as described above in 35% yield. It was purified by flash chromatography (5% EtOAc/PE) to afford a yellow oil;  $^1\text{H}$  NMR (500 MHz,  $\text{CDCl}_3$ )  $\delta$  7.30 (td,  $J = 8.4, 6.1$  Hz, 1H), 6.87 (dd,  $J = 18.4, 8.8$  Hz, 2H), 6.11 – 5.85 (m, 2H), 5.35 – 5.28 (m, 1H), 5.29 – 5.20 (m, 1H);  $^{13}\text{C}$  NMR (126 MHz,  $\text{CDCl}_3$ )  $\delta$  157.7 (C-F,  $^1J_{\text{C-F}} = 250.0$  Hz), 149.5 (C-F,  $^3J_{\text{C-F}} 6.0$  Hz), 145.6, 132.5, 131.0 (C-F,  $^3J_{\text{C-F}} = 9.1$  Hz), 119.5, 112.2 (C-F,  $^2J_{\text{C-F}} = 14.8$  Hz), 112.1 (C-F,  $^3J_{\text{C-F}} = 1.2$  Hz), 108.3 (C-F,  $^2J_{\text{C-F}} = 20.8$  Hz), 75.8;  $^{19}\text{F}$  NMR (471 MHz,  $\text{CDCl}_3$ )  $\delta$  -118.15; IR (thin film)  $\nu_{\text{max}}$  1777, 1604, 1468, 1241, 1148, 1046, 942, 787, 765, 747  $\text{cm}^{-1}$ ; HRMS (ESI) calculated for  $\text{C}_{10}\text{H}_8\text{FO}_3^+ [\text{M} + \text{H}]^+$  195.0452, found 195.0452.

### 8-chloro-4-vinyl-4H-benzo[d][1,3]dioxin-2-one (1l)

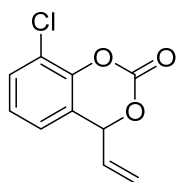

**1l**

Prepared according to the general procedure as described above in 10% yield. It was purified by flash chromatography (5% EtOAc/PE) to afford a white solid. Melting point: 46–47 °C;  $^1\text{H}$  NMR (500 MHz,  $\text{CDCl}_3$ )  $\delta$  7.36 (dd,  $J = 8.1, 1.4$  Hz, 1H), 7.10 (t,  $J = 7.8$  Hz, 1H), 6.99 (dt,  $J = 7.7, 1.2$  Hz, 1H), 5.96 (ddd,  $J = 16.9, 10.2, 6.5$  Hz, 1H), 5.81 (d,  $J = 6.5$  Hz, 1H), 5.44 (dd,  $J = 10.2, 1.0$  Hz, 1H), 5.37 (dd,  $J = 17.0, 1.2$  Hz, 1H);  $^{13}\text{C}$  NMR (126 MHz,  $\text{CDCl}_3$ )  $\delta$  145.46, 144.9, 132.5, 130.9, 125.7, 123.4, 121.7, 121.6, 121.5, 80.1; IR (thin film)  $\nu_{\text{max}}$  1774, 1457, 1236, 1162, 1140, 1028, 986, 785, 747  $\text{cm}^{-1}$ ; HRMS (ESI) calculated for  $\text{C}_{10}\text{H}_8\text{ClO}_3^+ [\text{M} + \text{H}]^+$  211.0156, found 211.0155.

**7-chloro-4-vinyl-4H-benzo[d][1,3]dioxin-2-one (1m)**

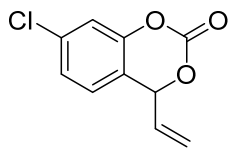

**1m**

Prepared according to the general procedure as described above in 19% yield. It was purified by flash chromatography (5% EtOAc/PE) to afford a yellow oil;  $^1\text{H}$  NMR (500 MHz,  $\text{CDCl}_3$ )  $\delta$  7.14 (dd,  $J = 8.2, 2.0$  Hz, 1H), 7.07 (d,  $J = 2.0$  Hz, 1H), 7.02 (d,  $J = 8.1$  Hz, 1H), 5.95 (ddd,  $J = 17.0, 10.3, 6.6$  Hz, 1H), 5.79 (d,  $J = 6.7$  Hz, 1H), 5.44 (d,  $J = 10.3$  Hz, 1H), 5.36 (d,  $J = 17.1$  Hz, 1H);  $^{13}\text{C}$  NMR (126 MHz,  $\text{CDCl}_3$ )  $\delta$  149.3, 145.7, 135.8, 132.6, 126.1, 125.6, 121.6, 118.4, 116.9, 80.0; IR (thin film)  $\nu_{\text{max}}$  1594, 1484, 1408, 1263, 1229, 982, 934, 900, 734, 703  $\text{cm}^{-1}$ ; HRMS (ESI) calculated for  $\text{C}_{10}\text{H}_8\text{ClO}_3^+$   $[\text{M} + \text{H}]^+$  211.0156, found 211.0156.

**6-chloro-4-vinyl-4H-benzo[d][1,3]dioxin-2-one (1n)**

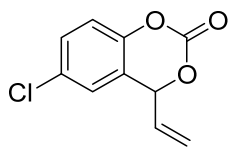

**1n**

Prepared according to the general procedure as described above in 34% yield. It was purified by flash chromatography (5% EtOAc/PE) to afford a yellow oil;  $^1\text{H}$  NMR (500 MHz,  $\text{CDCl}_3$ )  $\delta$  7.09 – 6.97 (m, 2H), 6.80 (dd,  $J = 7.6, 2.5$  Hz, 1H), 5.95 (ddd,  $J = 17.0, 10.3, 6.7$  Hz, 1H), 5.79 (d,  $J = 6.7$  Hz, 1H), 5.46 (d,  $J = 10.3$  Hz, 1H), 5.39 (dd,  $J = 17.0, 1.1$  Hz, 1H);  $^{13}\text{C}$  NMR (126 MHz,  $\text{CDCl}_3$ )  $\delta$  147.9, 145.8, 133.2, 132.33, 128.0, 121.9, 121.8, 118.1, 117.9, 79.7; IR (thin film)  $\nu_{\text{max}}$  1774, 1492, 1436, 1250, 1220, 1152, 1029, 824, 764  $\text{cm}^{-1}$ ; HRMS (ESI) calculated for  $\text{C}_{10}\text{H}_8\text{ClO}_3^+$   $[\text{M} + \text{H}]^+$  211.0156, found 211.0153.

**8-bromo-4-vinyl-4H-benzo[d][1,3]dioxin-2-one (1o)**

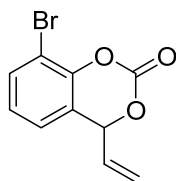

**1o**

Prepared according to the general procedure as described above in 8% yield. It was purified by flash chromatography (5% EtOAc/PE) to afford a white solid. Melting point: 78–79 °C. <sup>1</sup>H NMR (500 MHz, CDCl<sub>3</sub>) δ 7.58 – 7.50 (m, 1H), 7.07 – 6.99 (m, 2H), 5.96 (ddd, *J* = 16.9, 10.3, 6.5 Hz, 1H), 5.80 (dt, *J* = 6.6, 1.1 Hz, 1H), 5.44 (dd, *J* = 10.4, 1.0 Hz, 1H), 5.37 (dd, *J* = 17.1, 1.2 Hz, 1H); <sup>13</sup>C NMR (126 MHz, CDCl<sub>3</sub>) δ 146.0, 145.6, 134.0, 132.5, 126.1, 124.1, 121.7, 121.5, 110.1, 80.1; IR (thin film)  $\nu_{\max}$  1777, 1453, 1235, 1203, 1161, 1136, 1029, 986, 749, cm<sup>-1</sup>; HRMS (ESI) calculated for C<sub>10</sub>H<sub>8</sub>BrO<sub>3</sub><sup>+</sup> [M + H]<sup>+</sup> 254.9651, found 254.9650.

**7-bromo-4-vinyl-4H-benzo[d][1,3]dioxin-2-one (1p)**

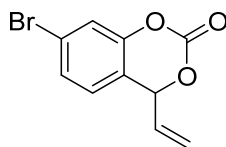

**1p**

Prepared according to the general procedure as described above in 12% yield. It was purified by flash chromatography (5% EtOAc/PE) to afford a light yellow solid. Melting point: 48–49 °C; <sup>1</sup>H NMR (500 MHz, CDCl<sub>3</sub>) δ 7.29 (dd, *J* = 8.1, 1.8 Hz, 1H), 7.22 (d, *J* = 1.9 Hz, 1H), 6.95 (dd, *J* = 8.1, 0.8 Hz, 1H), 5.95 (ddd, *J* = 17.0, 10.3, 6.6 Hz, 1H), 5.77 (dd, *J* = 6.8, 1.3 Hz, 1H), 5.44 (dd, *J* = 10.2, 1.0 Hz, 1H), 5.36 (dd, *J* = 17.1, 1.2 Hz, 1H); <sup>13</sup>C NMR (126 MHz, CDCl<sub>3</sub>) δ 148.3, 144.7, 131.5, 127.5, 125.3, 122.2, 120.5, 118.7, 117.9, 79.0; IR (thin film)  $\nu_{\max}$  1774, 1586, 1484, 1408, 1218, 1161, 1066, 1028, 947, 758 cm<sup>-1</sup>; HRMS (ESI) calculated for C<sub>10</sub>H<sub>8</sub>BrO<sub>3</sub><sup>+</sup> [M + H]<sup>+</sup> 254.9651, found 254.9652.

**6-bromo-4-vinyl-4H-benzo[d][1,3]dioxin-2-one (1q)**

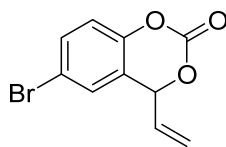

**1q**

Prepared according to the general procedure as described above in 13% yield. It was purified by flash chromatography (5% EtOAc/PE) to afford a white solid. Melting point: 50–51 °C; <sup>1</sup>H NMR (500 MHz, CDCl<sub>3</sub>) δ 7.41 (dd, *J* = 8.7, 2.3 Hz, 1H), 7.21 (dd, *J* = 2.4, 0.8 Hz, 1H), 6.93 (d, *J* = 8.6 Hz, 1H), 5.94 (ddd, *J* = 17.0, 10.3, 6.7 Hz, 1H), 5.79 (d, *J* = 6.8 Hz, 1H), 5.46 (d, *J* = 10.2 Hz, 1H), 5.39 (d, *J* = 17.0 Hz, 1H); <sup>13</sup>C NMR (126 MHz, CDCl<sub>3</sub>) δ 146.4, 144.8, 131.3, 129.6, 129.3, 124.1, 120.7, 120.5, 116.8, 78.8; IR (thin film)  $\nu_{\max}$  1769, 1479, 1260, 1148, 1124, 1108, 1027, 946, 817, 756, cm<sup>-1</sup>; HRMS (ESI) calculated for C<sub>10</sub>H<sub>8</sub>BrO<sub>3</sub><sup>+</sup> [M + H]<sup>+</sup> 254.9651, found 254.9651.

**8-tosyl-9-vinyl-8,9-dihydro-14aH-benzo[6,7][1,3,4]oxadiazepino[3,2-c]quinazoline (3aa)**

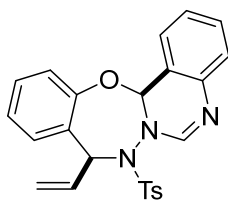

**3aa**

Prepared according to the general procedure as described above in 88% yield. It was purified by flash chromatography (20% EtOAc/PE) to afford a white solid. Melting point: 100–101 °C; <sup>1</sup>H NMR (500 MHz, CDCl<sub>3</sub>) δ 7.54 – 7.47 (m, 2H), 7.35 (ddd, *J* = 8.4, 6.8, 1.9 Hz, 1H), 7.28 (ddd, *J* = 17.7, 7.7, 1.4 Hz, 2H), 7.23 – 7.17 (m, 3H), 7.14 – 7.02 (m, 3H), 6.96 (dd, *J* = 7.9, 1.3 Hz, 1H), 6.90 (d, *J* = 1.5 Hz, 1H), 6.05 (ddd, *J* = 16.7, 10.2, 6.1 Hz, 1H), 5.97 (dt, *J* = 6.1, 1.5 Hz, 1H), 5.93 (d, *J* = 1.6 Hz, 1H), 5.24 (dt, *J* = 10.0, 1.0 Hz, 1H), 5.05 (dt, *J* = 16.9, 1.0 Hz, 1H), 2.27 (s, 3H); <sup>13</sup>C NMR (126 MHz, CDCl<sub>3</sub>) δ 158.1, 148.3, 145.1, 139.7, 134.6, 132.3, 130.9, 130.6, 130.1, 130.1, 123.0, 128.3, 128.2, 126.4, 126.1, 125.2, 122.2, 121.9, 121.4, 86.1, 67.3, 21.7; IR (thin film)  $\nu_{\max}$  1766, 1489, 1458, 1274, 1261, 1153, 1032, 942, 751 cm<sup>-1</sup>; HRMS (ESI) calculated for C<sub>24</sub>H<sub>22</sub>N<sub>3</sub>O<sub>3</sub>S<sup>+</sup> [M + H]<sup>+</sup> 432.1376, found 432.1376.



**13-ethoxy-8-tosyl-9-vinyl-8,9-dihydro-14aH-benzo[6,7][1,3,4]oxadiazepino [3,2-c]quinazoline (3ba)**

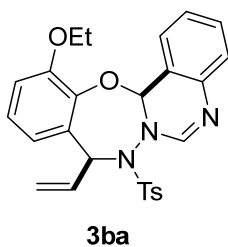

Prepared according to the general procedure as described above in 81% yield (38.4 mg). It was purified by flash chromatography (20% EtOAc/PE) to afford a white solid. Melting point: 130–131 °C; <sup>1</sup>H NMR (500 MHz, CDCl<sub>3</sub>) δ 7.55 – 7.51 (m, 2H), 7.35 (ddt, *J* = 5.7, 4.1, 1.9 Hz, 2H), 7.29 – 7.18 (m, 2H), 7.12 (d, *J* = 7.7 Hz, 2H), 7.05 (t, *J* = 7.9 Hz, 1H), 6.90 (dd, *J* = 7.7, 1.4 Hz, 1H), 6.85 (dd, *J* = 8.2, 1.5 Hz, 1H), 6.82 (d, *J* = 1.4 Hz, 0H), 6.11 (ddd, *J* = 16.8, 10.2, 6.3 Hz, 1H), 6.01 (d, *J* = 1.4 Hz, 1H), 5.93 (dt, *J* = 6.3, 1.4 Hz, 1H), 5.27 (dt, *J* = 10.1, 1.1 Hz, 1H), 5.19 (dt, *J* = 17.1, 1.2 Hz, 1H), 4.06 – 3.91 (m, 2H), 2.32 (s, 3H), 1.38 (t, *J* = 7.0 Hz, 3H); <sup>13</sup>C NMR (126 MHz, CDCl<sub>3</sub>) δ 150.6, 147.2, 146.4, 144.0, 138.6, 133.5, 132.1, 130.8, 129.4, 128.9, 127.8, 127.2, 125.2, 125.0, 124.5, 121.1, 120.3, 120.0, 112.8, 85.1, 66.3, 63.4, 20.6, 13.9; IR (thin film)  $\nu_{\max}$  1604, 1261, 1204, 1165, 1089, 931, 765, 751, 669 cm<sup>-1</sup>; HRMS (ESI) calculated for C<sub>26</sub>H<sub>26</sub>N<sub>3</sub>O<sub>4</sub>S<sup>+</sup> [M + H]<sup>+</sup> 476.1639, found 476.1638.

**12-methoxy-8-tosyl-9-vinyl-8,9-dihydro-14aH-benzo[6,7][1,3,4]oxadiazepino[3,2-c]quinazoline (3ca)**

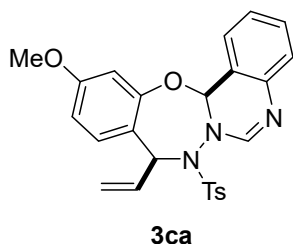

Prepared according to the general procedure as described above in 98% yield (45.1 mg). It was purified by flash chromatography (20% EtOAc/PE) to afford a light yellow solid. Melting point: 140–141 °C; <sup>1</sup>H NMR (500 MHz, CDCl<sub>3</sub>) δ 7.58 – 7.49 (m, 2H), 7.42 – 7.29 (m, 2H), 7.28 – 7.20 (m, 2H), 7.13 (d, *J* = 8.1 Hz, 2H), 6.98 – 6.88 (m, 2H), 6.82 (d, *J* = 3.0 Hz, 1H), 6.73 (dd, *J* = 8.7, 3.0 Hz, 1H), 6.04 (ddd, *J* = 16.8, 10.2, 6.1 Hz, 1H), 5.99 (d, *J* = 1.5 Hz, 1H), 5.89 (dt, *J* = 6.3, 1.5 Hz, 1H), 5.28 (dt, *J* = 10.2, 1.1 Hz, 1H), 5.11 (dt, *J* = 17.0, 1.1 Hz, 1H), 3.76 (s, 3H), 2.32 (s, 3H); <sup>13</sup>C NMR (126 MHz, CDCl<sub>3</sub>) δ 155.7, 150.5, 147.5, 144.3, 137.5, 133.4, 130.9, 130.7, 129.6, 129.0, 127.3, 127.1, 125.6, 124.4, 121.9, 121.3, 120.2, 113.9, 113.7, 85.3, 66.1, 54.7, 20.7; IR (thin film)  $\nu_{\max}$  1620, 1275, 1261, 1165, 930, 764, 750, 704, 663 cm<sup>-1</sup>; HRMS (ESI) calculated for C<sub>25</sub>H<sub>24</sub>N<sub>3</sub>O<sub>4</sub>S<sup>+</sup> [M + H]<sup>+</sup> 462.1482, found 462.1483.

**11-methoxy-8-tosyl-9-vinyl-8,9-dihydro-14aH-benzo[6,7][1,3,4]oxadiazepino[3,2-c]quinazoline (3da)**

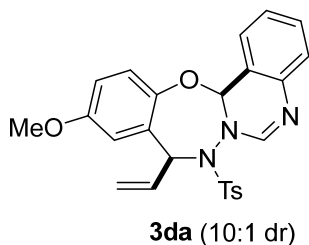

Prepared according to the general procedure as described above in 98% yield (45.1 mg, 10:1 dr). It was purified by flash chromatography (20% EtOAc/PE) to afford a light yellow solid. Melting point: 94–95 °C;  $^1\text{H}$  NMR (500 MHz,  $\text{CDCl}_3$ )  $\delta$  7.58 – 7.50 (m, 2H), 7.36 (ddd,  $J = 8.5, 6.7, 2.1$  Hz, 1H), 7.28 – 7.19 (m, 3H), 7.12 (d,  $J = 8.1$  Hz, 2H), 6.90 (d,  $J = 8.7$  Hz, 1H), 6.85 (d,  $J = 1.5$  Hz, 1H), 6.82 (d,  $J = 3.0$  Hz, 1H), 6.73 (dd,  $J = 8.7, 3.0$  Hz, 1H), 6.05 (ddd,  $J = 16.9, 10.2, 6.2$  Hz, 1H), 5.94 (d,  $J = 1.5$  Hz, 1H), 5.90 (dt,  $J = 6.2, 1.5$  Hz, 1H), 5.27 (dt,  $J = 10.2, 1.1$  Hz, 1H), 5.11 (dt,  $J = 17.1, 1.2$  Hz, 1H), 3.76 (s, 3H), 2.31 (s, 3H);  $^{13}\text{C}$  NMR (126 MHz,  $\text{CDCl}_3$ )  $\delta$  156.6, 151.7, 148.4, 145.1, 139.6, 134.6, 132.1, 131.8, 130.5, 123.0, 128.3, 128.2, 126.3, 126.1, 123.0, 122.0, 121.5, 114.9, 114.7, 86.2, 67.2, 55.8, 21.7; IR (thin film)  $\nu_{\text{max}}$  1605, 1495, 1203, 1176, 1165, 937, 764, 751, 667, 549  $\text{cm}^{-1}$ ; HRMS (ESI) calculated for  $\text{C}_{25}\text{H}_{24}\text{N}_3\text{O}_4\text{S}^+$   $[\text{M} + \text{H}]^+$  462.1482, found 462.1481.

**13-methyl-8-tosyl-9-vinyl-8,9-dihydro-14aH-benzo[6,7][1,3,4]oxadiazepino[3,2-c]quinazoline (3ea)**

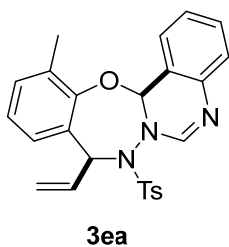

Prepared according to the general procedure as described above in 94% yield (41.8 mg). It was purified by flash chromatography (20% EtOAc/PE) to afford a light yellow solid. Melting point: 152–153 °C;  $^1\text{H}$  NMR (500 MHz,  $\text{CDCl}_3$ ) 7.57 – 7.48 (m, 2H), 7.38 (ddd,  $J = 8.4, 6.9, 1.8$  Hz, 2H), 7.28 (dd,  $J = 8.0, 1.2$  Hz, 2H), 7.26 – 7.19 (m, 3H), 7.15 (dd,  $J = 7.4, 1.7$  Hz, 4H), 7.11 (dd,  $J = 8.1, 2.2$  Hz, 1H), 7.00 (t,  $J = 7.5$  Hz, 1H), 6.87 (d,  $J = 1.5$  Hz, 1H), 6.08 (ddd,  $J = 16.7, 10.2, 6.3$  Hz, 1H), 5.95 (dd,  $J = 5.7, 1.6$  Hz, 1H), 5.25 (dt,  $J = 10.1, 1.1$  Hz, 1H), 5.11 (t,  $J = 1.2$  Hz, 1H), 2.31 (s, 3H), 2.16 (s, 3H);  $^{13}\text{C}$  NMR (126 MHz,  $\text{CDCl}_3$ )  $\delta$  156.5, 148.4, 145.1, 139.8, 134.6, 132.5, 131.6, 131.0, 130.9, 130.5, 129.9, 128.3, 128.2, 128.2, 127.7, 126.3, 126.2, 124.8, 121.8, 121.4, 86.0, 67.4, 21.7, 16.7; IR (thin film)  $\nu_{\text{max}}$  557, 667, 703, 733, 749, 764, 1166, 1264, 1491, 1619  $\text{cm}^{-1}$ ; HRMS (ESI) calculated for  $\text{C}_{25}\text{H}_{24}\text{N}_3\text{O}_3\text{S}^+$   $[\text{M} + \text{H}]^+$  446.1533, found 446.1533.

**12-methyl-8-tosyl-9-vinyl-8,9-dihydro-14aH-benzo[6,7][1,3,4]oxadiazepino[3,2-c]quinazoline (3fa)**

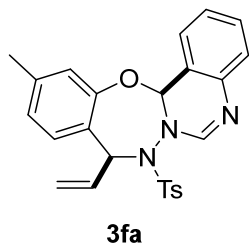

Prepared according to the general procedure as described above in 82% yield (36.5 mg). It was purified by flash chromatography (20% EtOAc/PE) to afford a light yellow solid. Melting point: 138–139 °C; <sup>1</sup>H NMR (500 MHz, CDCl<sub>3</sub>) δ 7.59 – 7.48 (m, 2H), 7.37 (ddd, *J* = 7.9, 5.3, 3.4 Hz, 1H), 7.30 – 7.16 (m, 4H), 7.11 (d, *J* = 8.1 Hz, 2H), 6.98 – 6.89 (m, 1H), 6.86 (d, *J* = 1.5 Hz, 1H), 6.80 (d, *J* = 1.7 Hz, 1H), 6.04 (ddd, *J* = 17.0, 10.2, 6.1 Hz, 1H), 6.00 (d, *J* = 1.5 Hz, 1H), 5.94 (dt, *J* = 6.0, 1.5 Hz, 1H), 5.24 (dt, *J* = 10.2, 1.1 Hz, 1H), 5.06 (dt, *J* = 17.0, 1.1 Hz, 1H), 2.31 (s, 3H), 2.27 (s, 3H); <sup>13</sup>C NMR (126 MHz, CDCl<sub>3</sub>) δ 189.5, 145.3, 143.5, 137.2, 134.6, 131.7, 130.6, 128.9, 128.8, 128.0, 127.6, 127.6, 127.5, 127.5, 123.5, 121.7, 118.3, 97.6, 83.8; IR (thin film)  $\nu_{\max}$  549, 597, 666, 703, 733, 764, 1165, 1263, 1605, 1618 cm<sup>-1</sup>; HRMS (ESI) calculated for C<sub>25</sub>H<sub>24</sub>N<sub>3</sub>O<sub>3</sub>S<sup>+</sup> [M + H]<sup>+</sup> 446.1533, found 446.1533.

**11-methyl-8-tosyl-9-vinyl-8,9-dihydro-14aH-benzo[6,7][1,3,4]oxadiazepino[3,2-c]quinazoline (3ga)**

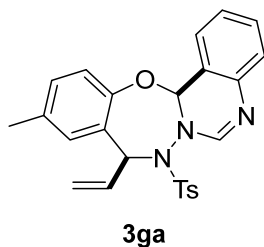

Prepared according to the general procedure as described above in 87% yield (38.7 mg). It was purified by flash chromatography (20% EtOAc/PE) to afford a light yellow solid, Melting point: 100–101 °C; <sup>1</sup>H NMR (500 MHz, CDCl<sub>3</sub>) δ 7.56 – 7.48 (m, 2H), 7.36 (ddd, *J* = 8.1, 5.9, 2.8 Hz, 1H), 7.27 – 7.19 (m, 3H), 7.14 – 7.07 (m, 3H), 7.04 – 6.99 (m, 1H), 6.87 (d, *J* = 8.0 Hz, 1H), 6.84 (d, *J* = 1.5 Hz, 1H), 6.05 (ddd, *J* = 16.8, 10.2, 6.2 Hz, 1H), 6.00 (d, *J* = 1.5 Hz, 1H), 5.91 (dt, *J* = 6.2, 1.5 Hz, 1H), 5.25 (dt, *J* = 10.2, 1.1 Hz, 1H), 5.08 (dt, *J* = 17.1, 1.2 Hz, 1H), 2.31 (s, 3H), 2.29 (s, 3H); <sup>13</sup>C NMR (126 MHz, CDCl<sub>3</sub>) δ 154.9, 147.3, 144.0, 138.6, 133.8, 133.5, 131.4, 129.5, 129.5, 129.4, 128.9, 127.3, 127.2, 125.3, 125.0, 120.9, 120.8, 120.5, 85.1, 66.2, 20.6, 19.7; IR (thin film)  $\nu_{\max}$  1915, 1605, 1177, 1165, 934, 765, 754, 667, 624, 557 cm<sup>-1</sup>; HRMS (ESI) calculated for C<sub>25</sub>H<sub>24</sub>N<sub>3</sub>O<sub>3</sub>S<sup>+</sup> [M + H]<sup>+</sup> 446.1533, found 446.1532.

**13-methyl-8-tosyl-9-vinyl-8,9-dihydro-14aH-benzo[6,7][1,3,4]oxadiazepino[3,2-c]quinazoline (3ha)**

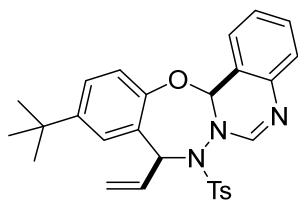

**3ha**

Prepared according to the general procedure as described above in 75% yield (36.5 mg). It was purified by flash chromatography (20% EtOAc/PE) to afford a light yellow solid; Melting point: 148–149 °C; <sup>1</sup>H NMR (500 MHz, CDCl<sub>3</sub>) δ 7.53 – 7.43 (m, 2H), 7.36 (ddd, *J* = 8.5, 7.2, 1.5 Hz, 1H), 7.31 – 7.19 (m, 4H), 7.14 (dd, *J* = 7.6, 1.5 Hz, 1H), 7.07 (d, *J* = 8.1 Hz, 1H), 6.96 (d, *J* = 1.5 Hz, 1H), 6.87 (d, *J* = 8.3 Hz, 1H), 6.08 (ddd, *J* = 16.8, 10.2, 6.2 Hz, 1H), 5.96 (dt, *J* = 6.2, 1.5 Hz, 1H), 5.77 (d, *J* = 1.5 Hz, 1H), 5.27 (dt, *J* = 10.2, 1.1 Hz, 1H), 5.10 (dt, *J* = 17.0, 1.1 Hz, 1H), 2.30 (s, 3H), 1.29 (s, 9H); <sup>13</sup>C NMR (126 MHz, CDCl<sub>3</sub>) δ 154.7, 147.5, 147.2, 143.9, 138.7, 133.9, 131.5, 129.5, 129.0, 128.8, 127.2, 127.1, 125.8, 125.2, 125.1, 120.8, 120.5, 120.4, 85.0, 66.8, 33.5, 30.4, 20.6; IR (thin film)  $\nu_{\max}$  1619, 1274, 1262, 1167, 764, 749, 703, 668, 622, 551 cm<sup>-1</sup>; HRMS (ESI) calculated for C<sub>28</sub>H<sub>30</sub>N<sub>3</sub>O<sub>3</sub>S<sup>+</sup> [M + H]<sup>+</sup> 488.2002, found 488.2003.

**12-fluoro-8-tosyl-9-vinyl-8,9-dihydro-14aH-benzo[6,7][1,3,4]oxadiazepino[3,2-c]quinazoline (3ia)**

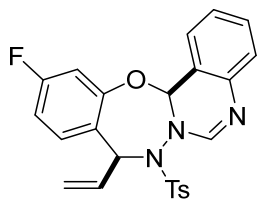

**3ia**

Prepared according to the general procedure as described above in 62% yield (27.8 mg). It was purified by flash chromatography (20% EtOAc/PE) to afford a yellow oil; <sup>1</sup>H NMR (500 MHz, CDCl<sub>3</sub>) δ 7.60 – 7.55 (m, 2H), 7.39 (ddd, *J* = 8.5, 6.9, 1.8 Hz, 1H), 7.29 (dd, *J* = 8.0, 1.2 Hz, 1H), 7.27 – 7.19 (m, 2H), 7.18 – 7.12 (m, 3H), 6.95 – 6.84 (m, 2H), 6.78 (dt, *J* = 8.1, 1.1 Hz, 1H), 6.50 (dq, *J* = 6.2, 1.4 Hz, 1H), 6.07 (d, *J* = 1.5 Hz, 1H), 6.02 (ddd, *J* = 16.7, 10.2, 6.1 Hz, 1H), 5.28 (dd, *J* = 10.3, 1.4 Hz, 1H), 5.11 (dd, *J* = 17.1, 1.5 Hz, 1H), 2.32 (s, 3H); <sup>13</sup>C NMR (126 MHz, CDCl<sub>3</sub>) δ 159.9, 158.4 (C-F, <sup>3</sup>*J*<sub>C-F</sub> = 4.0 Hz), 157.91, 147.0, 144.2, 138.6, 133.7, 130.3, 129.7, 129.3 (C-F, <sup>2</sup>*J*<sub>C-F</sub> = 10.3 Hz), 129.0, 127.2, 127.0, 125.3 (C-F, <sup>2</sup>*J*<sub>C-F</sub> = 25.5 Hz), 120.9, 120.0, 118.3 (C-F, <sup>2</sup>*J*<sub>C-F</sub> = 15.1 Hz), 116.8 (C-F, <sup>3</sup>*J*<sub>C-F</sub> = 3.3 Hz), 111.0 (C-F, <sup>2</sup>*J*<sub>C-F</sub> = 22.9 Hz), 85.4, 57.5 (C-F, <sup>3</sup>*J*<sub>C-F</sub> = 6.5 Hz), 20.7; <sup>19</sup>F NMR (471 MHz, CDCl<sub>3</sub>) δ -115.59; IR (thin film)  $\nu_{\max}$  1619 1263, 1167, 1007, 910, 764, 747, 732, 703, 667, 550 cm<sup>-1</sup>; HRMS (ESI) calculated for C<sub>24</sub>H<sub>21</sub>FN<sub>3</sub>O<sub>3</sub>S<sup>+</sup> [M + H]<sup>+</sup> 450.1282, found 450.1281.

**11-fluoro-8-tosyl-9-vinyl-8,9-dihydro-14aH-benzo[6,7][1,3,4]oxadiazepino[3,2-c]quinazoline (3ja)**

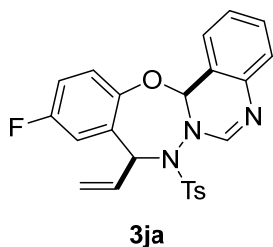

Prepared according to the general procedure as described above in 43% yield (19.3 mg). It was purified by flash chromatography (20% EtOAc/PE) to afford a light yellow solid. Melting point: 135–136 °C; <sup>1</sup>H NMR (500 MHz, CDCl<sub>3</sub>) δ 7.54 (d, *J* = 8.4 Hz, 2H), 7.38 (ddd, *J* = 8.4, 6.8, 1.9 Hz, 1H), 7.30 – 7.19 (m, 3H), 7.14 (d, *J* = 8.1 Hz, 2H), 7.03 (dd, *J* = 8.2, 2.9 Hz, 1H), 6.99 – 6.87 (m, 2H), 6.83 (d, *J* = 1.5 Hz, 1H), 6.13 – 5.98 (m, 2H), 5.89 (dt, *J* = 6.2, 1.5 Hz, 1H), 5.29 (d, *J* = 10.1 Hz, 1H), 5.11 (dd, *J* = 17.1, 1.5 Hz, 1H), 2.32 (s, 3H); <sup>13</sup>C NMR (126 MHz, CDCl<sub>3</sub>) δ 159.3, 157.3, 153.1 (C-F, <sup>3</sup>*J*<sub>C-F</sub> = 2.7 Hz), 147.0, 144.3, 138.5, 133.3, 131.6 (C-F, <sup>3</sup>*J*<sub>C-F</sub> = 7.2 Hz), 130.6, 129.6, 129.0, 127.3, 127.1, 122.6 (C-F, <sup>3</sup>*J*<sub>C-F</sub> = 8.4 Hz), 121.3, 120.1, 115.6, 115.4 (C-F, <sup>3</sup>*J*<sub>C-F</sub> = 23.3, 17.7 Hz), 115.3, 85.3, 65.6, 20.7; <sup>19</sup>F NMR (471 MHz, CDCl<sub>3</sub>) δ -117.41; IR (thin film) ν<sub>max</sub> 1619, 1606, 1264, 1166, 934, 733, 666, 654, 592, 550 cm<sup>-1</sup>; HRMS (ESI) calculated for C<sub>24</sub>H<sub>21</sub>FN<sub>3</sub>O<sub>3</sub>S<sup>+</sup> [M + H]<sup>+</sup> 450.1282, found 450.1284.

**10-fluoro-8-tosyl-9-vinyl-8,9-dihydro-14aH-benzo[6,7][1,3,4]oxadiazepino[3,2-c]quinazoline (3ka)**

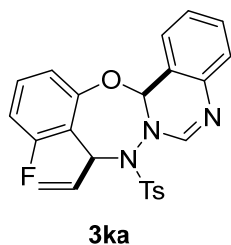

Prepared according to the general procedure as described above in 54% yield (24.3 mg). It was purified by flash chromatography (20% EtOAc/PE) to afford a light yellow solid. Melting point: 132–133 °C; <sup>1</sup>H NMR (500 MHz, CDCl<sub>3</sub>) δ 7.57 – 7.50 (m, 2H), 7.39 (ddd, *J* = 8.0, 7.2, 1.7 Hz, 1H), 7.34 – 7.20 (m, 4H), 7.17 – 7.11 (m, 2H), 6.93 – 6.79 (m, 2H), 6.72 (dd, *J* = 9.2, 2.6 Hz, 1H), 6.07 (d, *J* = 1.5 Hz, 1H), 6.06 – 6.00 (m, 1H), 5.97 (dt, *J* = 6.0, 1.4 Hz, 1H), 5.27 (d, *J* = 10.5 Hz, 1H), 5.05 (d, *J* = 17.3 Hz, 1H), 2.33 (s, 3H); <sup>13</sup>C NMR (126 MHz, CDCl<sub>3</sub>) δ 163.0, 161.0, 158.3 (C-F, <sup>2</sup>*J*<sub>C-F</sub> = 11.2 Hz), 147.0, 144.3, 138.5, 133.4, 131.2, 130.1 (C-F, <sup>3</sup>*J*<sub>C-F</sub> = 9.9 Hz), 129.7, 129.0, 127.2, 127.2, 126.0 (C-F, <sup>3</sup>*J*<sub>C-F</sub> = 3.4 Hz), 125.5, 125.2, 120.9, 119.9, 111.0 (C-F, <sup>2</sup>*J*<sub>C-F</sub> = 21.3 Hz), 109.0 (C-F, <sup>2</sup>*J*<sub>C-F</sub> = 23.1 Hz), 85.5, 66.0, 20.7; <sup>19</sup>F NMR (471 MHz, CDCl<sub>3</sub>) δ -115.59; IR (thin film) ν<sub>max</sub> 1617, 1605, 1263, 1166, 764, 747, 734, 703, 666, 549 cm<sup>-1</sup>; HRMS (ESI) calculated for C<sub>24</sub>H<sub>21</sub>FN<sub>3</sub>O<sub>3</sub>S<sup>+</sup> [M + H]<sup>+</sup> 450.1282, found 450.1283.

**13-chloro-8-tosyl-9-vinyl-8,9-dihydro-14aH-benzo[6,7][1,3,4]oxadiazepino[3,2-c]quinazoline (3la)**

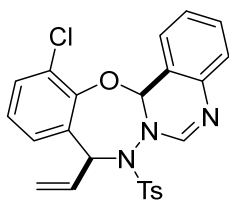

**3la**

Prepared according to the general procedure as described above in 75% yield (34.8 mg). It was purified by flash chromatography (20% EtOAc/PE) to afford a light yellow solid. Melting point: 90–91 °C; <sup>1</sup>H NMR (500 MHz, CDCl<sub>3</sub>) δ 7.53 (d, *J* = 8.2 Hz, 2H), 7.47 – 7.32 (m, 3H), 7.30 – 7.22 (m, 3H), 7.14 (d, *J* = 8.1 Hz, 2H), 7.07 (t, *J* = 7.8 Hz, 1H), 6.81 (d, *J* = 1.5 Hz, 1H), 6.13 (s, 1H), 5.96 (d, *J* = 6.4 Hz, 1H), 5.30 (d, *J* = 10.2 Hz, 1H), 5.14 (dd, *J* = 17.0, 1.4 Hz, 1H), 2.33 (s, 3H); <sup>13</sup>C NMR (126 MHz, CDCl<sub>3</sub>) δ 154.0, 147.8, 145.4, 139.6, 134.2, 133.5, 131.6, 130.8, 130.7, 130.0, 129.2, 128.3, 128.3, 128.2, 127.8, 126.5, 126.2, 125.8, 122.4, 120.6, 86.8, 67.0, 21.7; IR (thin film)  $\nu_{\max}$  1622, 1606, 1456, 1275, 1260, 1166, 764, 750, 704, 667 cm<sup>-1</sup>; HRMS (ESI) calculated for C<sub>24</sub>H<sub>21</sub>ClN<sub>3</sub>O<sub>3</sub>S<sup>+</sup> [M + H]<sup>+</sup> 466.0987, found 466.0985.

**12-chloro-8-tosyl-9-vinyl-8,9-dihydro-14aH-benzo[6,7][1,3,4]oxadiazepino[3,2-c]quinazoline (3ma)**

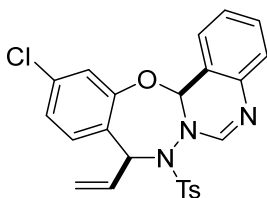

**3ma**

Prepared according to the general procedure as described above in 67% yield (31.2mg). It was purified by flash chromatography (20% EtOAc/PE) to afford a light yellow solid. Melting point: 90–91 °C; <sup>1</sup>H NMR (500 MHz, CDCl<sub>3</sub>) δ 7.61 – 7.49 (m, 2H), 7.40 (ddd, *J* = 8.3, 6.8, 2.0 Hz, 1H), 7.31 – 7.21 (m, 4H), 7.17 – 7.09 (m, 3H), 7.02 (d, *J* = 2.1 Hz, 1H), 6.83 (d, *J* = 1.5 Hz, 1H), 6.09 (d, *J* = 1.5 Hz, 1H), 6.02 (ddd, *J* = 16.7, 10.1, 6.0 Hz, 1H), 5.99 – 5.93 (m, 1H), 5.46 – 5.14 (m, 1H), 5.06 (dd, *J* = 17.0, 1.4 Hz, 1H), 2.34 (s, 3H); <sup>13</sup>C NMR (126 MHz, CDCl<sub>3</sub>) δ 158.7, 148.0, 145.4, 139.5, 135.2, 134.3, 131.9, 130.9, 130.8, 130.1, 129.6, 128.3, 128.2, 126.5, 126.2, 125.4, 122.8, 122.1, 121.0, 86.5, 66.6, 21.7; IR (thin film)  $\nu_{\max}$  1622, 1274, 1263, 1167, 937, 764, 748, 703, 666, 550, cm<sup>-1</sup>; HRMS (ESI) calculated for C<sub>24</sub>H<sub>21</sub>ClN<sub>3</sub>O<sub>3</sub>S<sup>+</sup> [M + H]<sup>+</sup> 466.0987, found 466.0986.

**11-chloro-8-tosyl-9-vinyl-8,9-dihydro-14aH-benzo[6,7][1,3,4]oxadiazepino[3,2-c]quinazoline (3na)**

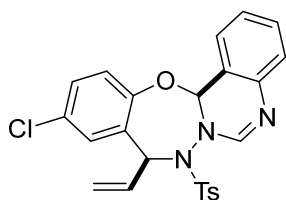

**3na**

Prepared according to the general procedure as described above in 75% yield (34.9 mg). It was purified by flash chromatography (20% EtOAc/PE) to afford a light yellow solid. Melting point: 152–153 °C; <sup>1</sup>H NMR (500 MHz, CDCl<sub>3</sub>) δ 7.58 – 7.51 (m, 2H), 7.38

(ddd, *J* = 8.4, 6.8, 2.0 Hz, 1H), 7.31 – 7.17 (m, 5H), 7.15 (d, *J* = 8.1 Hz, 2H), 6.93 (d, *J* = 8.5 Hz, 1H), 6.82 (d, *J* = 1.5 Hz, 1H), 6.08 (d, *J* = 1.5 Hz, 1H), 6.02 (ddd, *J* = 16.8, 10.2, 6.2 Hz, 1H), 5.90 (dt, *J* = 6.2, 1.5 Hz, 1H), 5.29 (dd, *J* = 10.2, 1.3 Hz, 1H), 5.09 (dd, *J* = 17.1, 1.5 Hz, 1H), 2.33 (s, 3H); <sup>13</sup>C NMR (126 MHz, CDCl<sub>3</sub>) δ 156.7, 148.0, 145.4, 139.5, 134.3, 132.6, 131.6, 130.7, 130.2, 130.1, 123.0, 129.8, 128.3, 128.2, 126.5, 126.2, 123.7, 122.4, 121.1, 86.4, 66.6, 21.7; IR (thin film)  $\nu_{\max}$  554, 1618, 1605, 1275, 1260, 1165, 935, 763, 749, 668 cm<sup>-1</sup>; HRMS (ESI) calculated for C<sub>24</sub>H<sub>21</sub>ClN<sub>3</sub>O<sub>3</sub>S<sup>+</sup> [M + H]<sup>+</sup> 466.0987, found 466.0985.

**13-bromo-8-tosyl-9-vinyl-8,9-dihydro-14aH-benzo[6,7][1,3,4]oxadiazepino[3,2-c]quinazoline (3oa)**

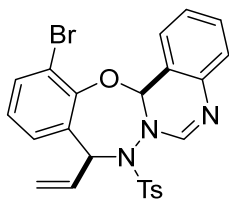

**3oa**

Prepared according to the general procedure as described above in 51% yield (26 mg). It was purified by flash chromatography (20% EtOAc/PE) to afford a light yellow solid. Melting point: 140–141 °C; <sup>1</sup>H NMR (500 MHz, CDCl<sub>3</sub>) δ 7.59 – 7.48 (m, 4H), 7.39 (ddd, *J* = 8.3, 7.3, 1.5 Hz,

1H), 7.31 – 7.24 (m, 3H), 7.14 (d, *J* = 8.1 Hz, 2H), 7.00 (t, *J* = 7.7 Hz, 1H), 6.82 (d, *J* = 1.5 Hz, 1H), 6.12 (d, *J* = 1.5 Hz, 1H), 6.07 (ddd, *J* = 16.8, 10.2, 6.3 Hz, 1H), 5.96 (dt, *J* = 6.3, 1.5 Hz, 1H), 5.29 (dt, *J* = 10.2, 1.0 Hz, 1H), 5.18 – 5.08 (m, 1H), 2.33 (s, 3H); <sup>13</sup>C NMR (126 MHz, CDCl<sub>3</sub>) δ 154.0, 146.8, 144.3, 138.6, 133.2, 132.7, 132.3, 130.6, 129.7, 129.0, 128.4, 128.1, 127.2, 125.4, 125.2, 125.1, 121.4, 119.5, 116.3, 85.8, 66.0, 20.7; IR (thin film)  $\nu_{\max}$  1621, 1605, 1488, 1275, 1260, 1165, 764, 750, 666, 545 cm<sup>-1</sup>; HRMS (ESI) calculated for C<sub>24</sub>H<sub>21</sub>BrN<sub>3</sub>O<sub>3</sub>S<sup>+</sup> [M + H]<sup>+</sup> 510.0482, found 510.0482.

**12-bromo-8-tosyl-9-vinyl-8,9-dihydro-14aH-benzo[6,7][1,3,4]oxadiazepino[3,2-c]quinazoline (3pa)**

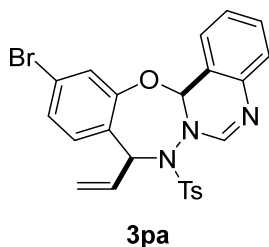

Prepared according to the general procedure as described above in 61% yield (31.1 mg). It was purified by flash chromatography (20% EtOAc/PE) to afford a light yellow solid. Melting point: 89–90 °C;  $^1\text{H}$  NMR (500 MHz,  $\text{CDCl}_3$ )  $\delta$  7.58 – 7.49 (m, 2H), 7.39 (ddd,  $J$  = 8.1, 6.5, 2.3 Hz, 1H), 7.32 – 7.20 (m, 4H), 7.20 – 7.17 (m, 2H), 7.17 – 7.10 (m, 2H), 6.83 (d,  $J$  = 1.5 Hz, 1H), 6.09 (d,  $J$  = 1.5 Hz, 1H), 6.02 (ddd,  $J$  = 16.9, 10.1, 6.1 Hz, 1H), 5.95 (dt,  $J$  = 6.1, 1.4 Hz, 1H), 5.28 (dd,  $J$  = 10.1, 1.9 Hz, 1H), 5.06 (dd,  $J$  = 16.9, 1.6 Hz, 1H), 2.33 (s, 3H);  $^{13}\text{C}$  NMR (126 MHz,  $\text{CDCl}_3$ )  $\delta$  157.8, 146.9, 144.4, 138.5, 133.3, 130.8, 130.1, 129.7, 129.1, 129.0, 127.3, 127.3, 127.1, 125.5, 125.1, 124.7, 121.9, 121.1, 119.9, 85.5, 65.7, 20.7; IR (thin film)  $\nu_{\text{max}}$  1618, 1605, 1495, 1203, 1164, 765, 752, 734, 667, 548,  $\text{cm}^{-1}$ ; HRMS (ESI) calculated for  $\text{C}_{24}\text{H}_{21}\text{BrN}_3\text{O}_3\text{S}^+$   $[\text{M} + \text{H}]^+$  510.0482, found 510.0482.

**11-chloro-8-tosyl-9-vinyl-8,9-dihydro-14aH-benzo[6,7][1,3,4]oxadiazepino[3,2-c]quinazoline (3qa)**

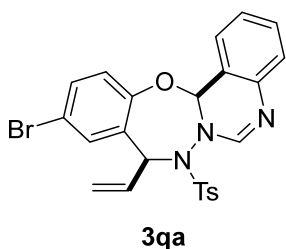

Prepared according to the general procedure as described above in 49% yield (24.9 mg). It was purified by flash chromatography (20% EtOAc/PE) to afford a light yellow solid. Melting point: 138–139 °C;  $^1\text{H}$  NMR (500 MHz,  $\text{CDCl}_3$ )  $\delta$  7.62 – 7.49 (m, 2H), 7.44 (d,  $J$  = 2.4 Hz, 1H), 7.38 (ddd,  $J$  = 8.6, 6.9, 1.8 Hz, 1H), 7.33 (dd,  $J$  = 8.5, 2.4 Hz, 1H), 7.30 – 7.19 (m, 3H), 7.15 (d,  $J$  = 8.0 Hz, 2H), 6.87 (d,  $J$  = 8.5 Hz, 1H), 6.82 (d,  $J$  = 1.5 Hz, 1H), 6.08 (d,  $J$  = 1.5 Hz, 1H), 6.01 (ddd,  $J$  = 16.8, 10.2, 6.1 Hz, 1H), 5.89 (dt,  $J$  = 6.2, 1.5 Hz, 1H), 5.29 (dd,  $J$  = 10.3, 1.3 Hz, 1H), 5.09 (dd,  $J$  = 17.0, 1.4 Hz, 1H), 2.32 (s, 3H);  $^{13}\text{C}$  NMR (126 MHz,  $\text{CDCl}_3$ )  $\delta$  156.2, 146.9, 144.4, 138.4, 133.3, 132.0, 131.9, 131.6, 130.6, 129.7, 129.0, 127.3, 127.2, 125.5, 125.1, 123.0, 121.3, 120.0, 116.8, 85.4, 65.5, 20.7; IR (thin film)  $\nu_{\text{max}}$  1618, 1605, 1478, 1261, 1165, 804, 765, 751, 663, 549  $\text{cm}^{-1}$ ; HRMS (ESI) calculated for  $\text{C}_{24}\text{H}_{21}\text{BrN}_3\text{O}_3\text{S}^+$   $[\text{M} + \text{H}]^+$  510.0482, found 510.0482.



**2-fluoro-8-tosyl-9-vinyl-8,9-dihydro-14aH-benzo[6,7][1,3,4]oxadiazepino[3,2-c]quinazoline (3ab)**

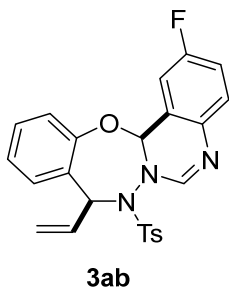

Prepared according to the general procedure as described above in 99% yield (44.4 mg). It was purified by flash chromatography (20% EtOAc/PE) to afford a light yellow solid. Melting point: 146–147 °C;  $^1\text{H}$  NMR (500 MHz,  $\text{CDCl}_3$ )  $\delta$  7.51 (d,  $J = 8.4$  Hz, 2H), 7.31 (dd,  $J = 7.5, 1.7$  Hz, 1H), 7.28 – 7.22 (m, 2H), 7.16 – 7.04 (m, 4H), 6.97 (dd,  $J = 8.0, 1.3$  Hz, 1H), 6.91 – 6.84 (m, 2H), 6.04 (ddd,  $J = 16.6, 10.1, 6.0$  Hz, 1H), 5.98 (dt,  $J = 6.1, 1.4$  Hz, 1H), 5.89 (d,  $J = 1.5$  Hz, 1H), 5.26 (d,  $J = 10.0$  Hz, 1H), 5.10 – 5.00 (m, 1H), 2.31 (s, 3H);  $^{13}\text{C}$  NMR (126 MHz,  $\text{CDCl}_3$ )  $\delta$  160.5 (C-F,  $^1J_{\text{C-F}} = 246.1$  Hz), 157.9, 147.7 (C-F,  $^3J_{\text{C-F}} = 2.1$  Hz), 145.2, 136.2 (C-F,  $^3J_{\text{C-F}} = 2.7$  Hz), 134.5, 132.3, 130.8, 130.2, 130.1, 130.0, 128.2, 128.0 (C-F,  $^3J_{\text{C-F}} = 8.4$  Hz), 127.9, 125.4, 122.5 (C-F,  $^3J_{\text{C-F}} = 8.2$  Hz), 122.1, 122.0, 118.0 (C-F,  $^2J_{\text{C-F}} = 22.6$  Hz), 114.3 (C-F,  $^2J_{\text{C-F}} = 23.5$  Hz), 85.6 (C-F,  $^1J_{\text{C-F}} = 2.1$  Hz), 67.3, 21.7;  $^{19}\text{F}$  NMR (471 MHz,  $\text{CDCl}_3$ )  $\delta$  -114.97; IR (thin film)  $\nu_{\text{max}}$  1615, 1489, 1164, 857, 764, 749, 719, 667, 550  $\text{cm}^{-1}$ ; HRMS (ESI) calculated for  $\text{C}_{24}\text{H}_{22}\text{N}_3\text{O}_4\text{S}^+$  [ $\text{M} + \text{H}$ ] $^+$  448.1326, found 448.1326.

**2-methyl-8-tosyl-9-vinyl-8,9-dihydro-14aH-benzo[6,7][1,3,4]oxadiazepino[3,2-c]quinazoline (3ac)**

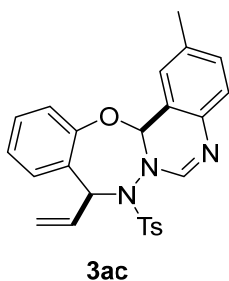

Prepared according to the general procedure as described above in 49% yield (21.8 mg). It was purified by flash chromatography (20% EtOAc/PE) to afford a light yellow solid. Melting point: 140–141 °C;  $^1\text{H}$  NMR (500 MHz,  $\text{CDCl}_3$ )  $\delta$  7.57 – 7.47 (m, 2H), 7.31 (dd,  $J = 7.5, 1.7$  Hz, 1H), 7.28 – 7.22 (m, 1H), 7.18 – 7.09 (m, 5H), 7.03 – 6.99 (m, 2H), 6.82 (d,  $J = 1.5$  Hz, 1H), 6.06 (ddd,  $J = 16.7, 10.2, 6.1$  Hz, 1H), 5.99 (d,  $J = 1.5$  Hz, 1H), 5.97 (dt,  $J = 6.1, 1.4$  Hz, 1H), 5.26 (dt,  $J = 10.0, 1.1$  Hz, 1H), 5.07 (dt,  $J = 16.9, 1.1$  Hz, 1H), 2.34 (s, 3H), 2.32 (s, 3H);  $^{13}\text{C}$  NMR (126 MHz,  $\text{CDCl}_3$ )  $\delta$  157.1, 146.6, 144.0, 136.3, 135.3, 133.6, 131.3, 130.5, 130.0, 129.0, 129.0, 128.9, 127.4, 127.1, 124.9, 124.1, 121.2, 120.8, 120.1, 85.2, 66.2, 20.6, 20.1; IR (thin film)  $\nu_{\text{max}}$  1610, 1275, 1261, 1165, 933, 764, 749, 669, 551  $\text{cm}^{-1}$ ; HRMS (ESI) calculated for  $\text{C}_{25}\text{H}_{24}\text{N}_3\text{O}_3\text{S}^+$  [ $\text{M} + \text{H}$ ] $^+$  446.1533, found 446.1533.

**1-methyl-8-tosyl-9-vinyl-8,9-dihydro-14aH-benzo[6,7][1,3,4]oxadiazepino[3,2-c]quinazoline (3ad)**

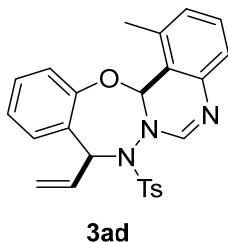

Prepared according to the general procedure as described above in 65% yield (28.9 mg). It was purified by flash chromatography (20% EtOAc/PE) to afford a light yellow solid. Melting point: 128–129 °C;  $^1\text{H}$  NMR (500 MHz,  $\text{CDCl}_3$ )  $\delta$  7.52 (d,  $J$  = 8.1 Hz, 2H), 7.31 (dd,  $J$  = 7.5, 1.7 Hz, 1H), 7.23 (td,  $J$  = 7.7, 1.7 Hz, 1H), 7.18 – 7.08 (m, 5H), 7.01 (dd,  $J$  = 8.2, 1.4 Hz, 2H), 6.82 (d,  $J$  = 1.5 Hz, 1H), 6.06 (ddd,  $J$  = 16.7, 10.2, 6.2 Hz, 1H), 6.00 – 5.92 (m, 2H), 5.25 (d,  $J$  = 10.1 Hz, 1H), 5.07 (d,  $J$  = 17.2 Hz, 1H), 2.33 (s, 3H), 2.31 (s, 3H);  $^{13}\text{C}$  NMR (126 MHz,  $\text{CDCl}_3$ ) 158.1, 147.7, 145.1, 137.3, 136.3, 134.6, 132.3, 131.6, 131.0, 130.07, 130.04, 129.9, 128.4, 128.2, 125.9, 125.2, 122.3, 121.9, 121.1, 86.2, 67.2, 21.7, 21.2  $\text{cm}^{-1}$ ; HRMS (ESI) calculated for  $\text{C}_{25}\text{H}_{24}\text{N}_3\text{O}_3\text{S}^+$   $[\text{M} + \text{H}]^+$  446.1533, found 446.1533.

**3-methoxy-8-tosyl-9-vinyl-8,9-dihydro-14aH-benzo[6,7][1,3,4]oxadiazepino[3,2-c]quinazoline (3ae)**

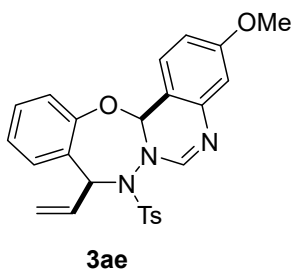

Prepared according to the general procedure as described above in 83% yield (38.3 mg). It was purified by flash chromatography (5% EtOAc/PE) to afford a light yellow solid. Melting point: 82–83 °C;  $^1\text{H}$  NMR (500 MHz,  $\text{CDCl}_3$ ) 7.57 – 7.44 (m, 2H), 7.31 (dd,  $J$  = 7.5, 1.7 Hz, 1H), 7.23 (td,  $J$  = 7.7, 1.7 Hz, 1H), 7.14 – 7.06 (m, 4H), 6.96 (dd,  $J$  = 7.9, 1.3 Hz, 1H), 6.89 (d,  $J$  = 1.5 Hz, 1H), 6.83 – 6.72 (m, 2H), 6.06 (ddd,  $J$  = 16.8, 10.2, 6.1 Hz, 1H), 5.97 (dd,  $J$  = 6.1, 1.5 Hz, 1H), 5.89 (d,  $J$  = 1.5 Hz, 1H), 5.26 (d,  $J$  = 9.9 Hz, 1H), 5.07 (d,  $J$  = 17.1 Hz, 1H), 3.76 (s, 3H), 2.31 (s, 3H);  $^{13}\text{C}$  NMR (126 MHz,  $\text{CDCl}_3$ )  $\delta$  161.3, 158.0, 148.7, 145.1, 141.0, 134.6, 132.3, 130.9, 130.1, 130.0, 129.9, 129.2, 128.2, 125.1, 122.3, 121.9, 114.1, 114.0, 109.2, 86.0, 67.2, 55.5, 21.7; IR (thin film)  $\nu_{\text{max}}$  1609, 1275, 1263, 1165, 764, 748, 733, 703, 669, 571  $\text{cm}^{-1}$ ; HRMS (ESI) calculated for  $\text{C}_{25}\text{H}_{23}\text{N}_3\text{O}_4\text{S}^+$   $[\text{M} + \text{H}]^+$  462.1482, found 462.1482.

**8-(mesitylsulfonyl)-9-vinyl-8,9-dihydro-14aH-benzo[6,7][1,3,4]oxadiazepino[3,2-c]quinazoline (3af)**

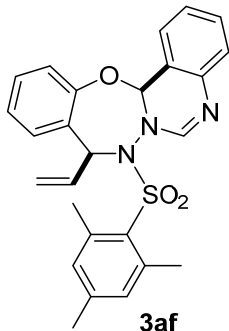

Prepared according to the general procedure as described above in 60% yield (27.6 mg). It was purified by flash chromatography (5% EtOAc/PE) to afford a white solid. Melting point: 131–132 °C; <sup>1</sup>H NMR (500 MHz, CDCl<sub>3</sub>) δ 7.42 – 7.30 (m, 3H), 7.29 – 7.20 (m, 3H), 7.12 (td, *J* = 7.4, 1.2 Hz, 1H), 7.07 (dd, *J* = 8.0, 1.2 Hz, 1H), 6.82 (s, 2H), 6.70 (d, *J* = 1.5 Hz, 1H), 6.55 (d, *J* = 1.5 Hz, 1H), 6.12 (ddd, *J* = 16.9, 10.2,

6.6 Hz, 1H), 5.97 (d, *J* = 6.6 Hz, 1H), 5.26 (d, *J* = 10.2 Hz, 1H), 5.14 (d, *J* = 17.0 Hz, 1H), 2.39 (s, 6H), 2.19 (s, 3H); <sup>13</sup>C NMR (126 MHz, CDCl<sub>3</sub>) δ 158.3, 147.7, 144.1, 140.8, 139.4, 132.3, 132.0, 131.4, 130.5, 130.3, 130.1, 129.9, 128.4, 126.5, 126.0, 125.4, 122.1, 121.8, 121.5, 86.5, 66.57, 22.8, 21.1; IR (thin film)  $\nu_{\max}$  1603, 1275, 1261, 1177, 1163, 930, 764, 750, 668, 627 cm<sup>-1</sup>; HRMS (ESI) calculated for C<sub>26</sub>H<sub>25</sub>N<sub>3</sub>O<sub>3</sub>S<sup>+</sup> [M + H]<sup>+</sup> 460.1689, found 460.1689.

**8-((4-(tert-butyl)phenyl)sulfonyl)-9-vinyl-8,9-dihydro-14aH-benzo[6,7][1,3,4]oxadiazepino[3,2-c]quinazoline (3ag)**

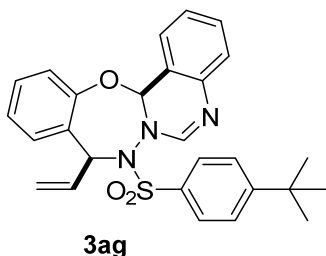

Prepared according to the general procedure as described above in 83% yield (39.3 mg). It was purified by flash chromatography (20% EtOAc/PE) to afford a white solid. Melting point: 156–157 °C; <sup>1</sup>H NMR (500 MHz, CDCl<sub>3</sub>) δ 7.59 – 7.46 (m, 2H), 7.37 (td, *J* = 7.6, 1.5 Hz, 1H), 7.34 – 7.26 (m,

4H), 7.21 (tdd, *J* = 7.4, 4.6, 1.5 Hz, 2H), 7.14 – 7.06 (m, 2H), 6.98 (s, 1H), 6.94 (dd, *J* = 7.9, 1.2 Hz, 1H), 6.07 (ddd, *J* = 16.8, 10.2, 6.1 Hz, 1H), 5.97 (dd, *J* = 6.1, 1.5 Hz, 1H), 5.77 (d, *J* = 1.5 Hz, 1H), 5.26 (dt, *J* = 10.1, 1.1 Hz, 1H), 5.07 (dt, *J* = 17.0, 1.0 Hz, 1H), 1.21 (s, 9H); <sup>13</sup>C NMR (126 MHz, CDCl<sub>3</sub>) δ 157.1, 157.0, 147.3, 138.6, 133.4, 131.3, 129.8, 129.5, 129.1, 129.0, 127.1, 126.9, 125.3, 125.2, 125.1, 124.2, 121.1, 120.9, 120.3, 85.0, 66.4, 34.2, 30.0; IR (thin film)  $\nu_{\max}$  1620, 1604, 1275, 1261, 1169, 931, 764, 750, 630, 547 cm<sup>-1</sup>; HRMS (ESI) calculated for C<sub>27</sub>H<sub>28</sub>N<sub>3</sub>O<sub>3</sub>S<sup>+</sup> [M + H]<sup>+</sup> 474.1846, found 474.1847

**8-((4-(methoxy)phenyl)sulfonyl)-9-vinyl-8,9-dihydro-14aH-benzo[6,7][1,3,4]oxadiazepino[3,2-c]quinazoline (3ah)**

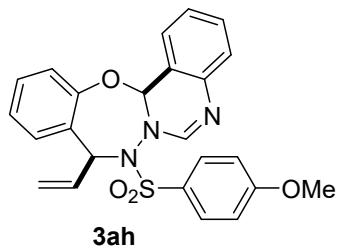

Prepared according to the general procedure as described above in 77% yield (34.4 mg). It was purified by flash chromatography (5% EtOAc/PE) to afford a light yellow solid. Melting point: 100–101 °C; <sup>1</sup>H NMR (500 MHz, CDCl<sub>3</sub>) δ 7.59 – 7.50 (m, 2H), 7.37 (ddd, *J* = 8.5, 6.6, 2.1 Hz, 1H), 7.33 – 7.19 (m, 5H), 7.11 (td, *J* = 7.4, 1.3 Hz, 1H), 6.97 (dd, *J* = 8.0, 1.3 Hz, 1H), 6.92 (d, *J* = 1.5 Hz, 1H), 6.80 – 6.68 (m, 2H), 6.06 (ddd, *J* = 16.7, 10.2, 6.1 Hz, 1H), 5.97 (dt, *J* = 6.1, 1.5 Hz, 1H), 5.94 (d, *J* = 1.5 Hz, 1H), 5.26 (dt, *J* = 10.2, 1.0 Hz, 1H), 5.06 (dt, *J* = 16.9, 1.0 Hz, 1H), 3.73 (s, 3H); <sup>13</sup>C NMR (126 MHz, CDCl<sub>3</sub>) δ 163.9, 158.1, 148.4, 139.7, 132.4, 130.9, 130.6, 130.4, 130.13, 130.09, 128.7, 128.3, 126.3, 126.1, 125.2, 122.2, 121.9, 121.3, 114.5, 85.9, 67.2, 55.7; IR (thin film)  $\nu_{\max}$  1621, 1605, 1274, 1262, 764, 748, 730, 702, 672, 556 cm<sup>-1</sup>; HRMS (ESI) calculated for C<sub>24</sub>H<sub>22</sub>N<sub>3</sub>O<sub>4</sub>S<sup>+</sup> [M + H]<sup>+</sup> 448.1326, found 448.1326.

**(9S,14aS)-8-tosyl-9-vinyl-8,9-dihydro-14aH-benzo[6,7][1,3,4]oxadiazepino[3,2-c]quinazoline (4aa)**

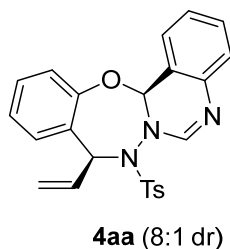

Prepared according to the general procedure as described above in 51% yield (22.0 mg, 8:1 dr). It was purified by flash chromatography (25% EtOAc/PE) to afford a white solid. Melting point: 98–99°C; [ $\alpha$ ]<sub>D</sub><sup>25</sup> = +72 (*c* 0.5, CH<sub>2</sub>Cl<sub>2</sub>); <sup>1</sup>H NMR (500 MHz, CDCl<sub>3</sub>) δ 7.63 – 7.54 (m, 2H), 7.47 – 7.27 (m, 6H), 7.23 – 7.16 (m, 3H), 7.05 (dd, *J* = 8.0, 1.2 Hz, 1H), 6.96 (d, *J* = 1.5 Hz, 1H), 6.14 (ddd, *J* = 16.6, 10.1, 6.1 Hz, 1H), 6.07 – 5.99 (m, 2H), 5.34 (d, *J* = 10.2 Hz, 1H), 5.14 (dd, *J* = 17.1, 1.4 Hz, 1H), 2.38 (s, 3H); <sup>13</sup>C NMR (126 MHz, CDCl<sub>3</sub>) δ 158.1, 148.3, 145.1, 139.6, 134.6, 132.3, 130.9, 130.6, 130.1, 130.0, 129.9, 128.3, 128.2, 126.3, 126.1, 125.2, 122.2, 121.9, 121.4, 86.1, 67.3, 21.7; IR (thin film)  $\nu_{\max}$  1766, 1489, 1458, 1274, 1261, 1153, 1032, 942, 751 cm<sup>-1</sup>; HRMS (ESI) calculated for C<sub>24</sub>H<sub>22</sub>N<sub>3</sub>O<sub>3</sub>S<sup>+</sup> [M + H]<sup>+</sup> 432.1376, found 432.1376.; HPLC analysis: **4aa**, 75% ee (IE, isopropanol : hexane=40 : 60, 1 mL/min, UV: 254 nm), *t*<sub>R</sub> =22.0 min (major), 24.1 min (minor).

**(9S,14aS)-13-ethoxy-8-tosyl-9-vinyl-8,9-dihydro-14aH-benzo[6,7][1,3,4]oxadiazepine-[3,2-c]quinazoline (4ba)**

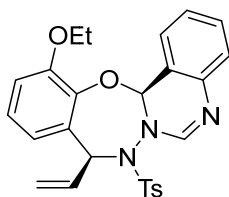

Prepared according to the general procedure as described above in 98% yield (48.5 mg, 16:1 dr). It was purified by flash chromatography (30% EtOAc/PE) to afford a white solid. Melting point: 128–129 °C;  $[\alpha]_D^{25} = +104$  (*c* 0.5, CH<sub>2</sub>Cl<sub>2</sub>); <sup>1</sup>H NMR (500 MHz, CDCl<sub>3</sub>) δ 7.59 (d, *J* = 8.2 Hz, 2H), 7.42 (ddd, *J* = 7.2, 4.0, 2.3 Hz, 2H), 7.35 – 7.26 (m, 2H), 7.14 (dd, *J* = 37.6, 8.0 Hz, 3H), 7.03 – 6.83 (m, 3H), 6.18 (ddd, *J* = 16.8, 10.2, 6.3 Hz, 1H), 6.06 (d, *J* = 1.5 Hz, 1H), 6.00 (dt, *J* = 6.4, 1.5 Hz, 1H), 5.34 (d, *J* = 10.2 Hz, 1H), 5.26 (dd, *J* = 17.1, 1.3 Hz, 1H), 4.21 – 3.94 (m, 2H), 2.38 (s, 3H), 1.44 (t, *J* = 7.0 Hz, 3H); <sup>13</sup>C NMR (126 MHz, CDCl<sub>3</sub>) δ 151.6, 148.2, 147.4, 145.0, 139.7, 134.6, 133.1, 131.9, 130.5, 129.9, 128.8, 128.2, 126.2, 126.0, 125.6, 122.1, 121.4, 121.1, 113.9, 86.1, 67.3, 64.4, 21.7, 14.9; IR (film)  $\nu_{\max}$  1604, 1261, 1204, 1165, 1089, 931, 765, 751, 669 cm<sup>-1</sup>; HRMS (ESI) calculated for C<sub>26</sub>H<sub>26</sub>N<sub>3</sub>O<sub>4</sub>S<sup>+</sup> [M + H]<sup>+</sup> 476.1639, found 476.1638; HPLC analysis: **4ba**, 94% ee (IE, isopropanol : hexane=40 : 60, 1 mL/min, UV: 254 nm), *t<sub>R</sub>* =25.6 min (major), 28.1 min (minor).

**(9S,14aS)-13-methyl-8-tosyl-9-vinyl-8,9-dihydro-14aH-benzo[6,7][1,3,4]oxadiazepino-[3,2-c]quinazoline (4ea)**

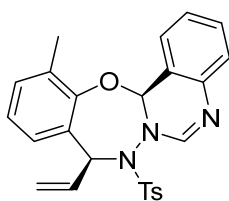

Prepared according to the general procedure as described above in 83% yield (36.9 mg, 6:1 dr). It was purified by flash chromatography (25% EtOAc/PE) to afford a light yellow solid. Melting point: 146–147 °C;  $[\alpha]_D^{25} = +40$  (*c* 0.5, CH<sub>2</sub>Cl<sub>2</sub>); <sup>1</sup>H NMR (500 MHz, CDCl<sub>3</sub>) δ 7.60 (d, *J* = 8.1 Hz, 2H), 7.48 – 7.04 (m, 10H), 6.98 – 6.89 (m, 1H), 6.15 (ddd, *J* = 16.8, 10.2, 6.2 Hz, 1H), 6.10 – 5.91 (m, 1H), 5.32 (d, *J* = 10.0 Hz, 1H), 5.17 (d, *J* = 17.0 Hz, 1H), 2.38 (s, 3H), 2.23 (s, 3H); <sup>13</sup>C NMR (126 MHz, CDCl<sub>3</sub>) δ 156.4, 148.45, 145.06, 134.6, 132.5, 131.5, 131.0, 130.9, 130.5, 129.93, 129.91, 128.3, 128.2, 127.7, 126.3, 126.2, 124.8, 121.8, 121.4, 86.0, 67.4, 21.7, 16.7; IR (film)  $\nu_{\max}$  1619, 1491, 1264, 1166, 764, 749, 733, 703, 667, 557 cm<sup>-1</sup>; HRMS (ESI) calculated for C<sub>25</sub>H<sub>24</sub>N<sub>3</sub>O<sub>3</sub>S<sup>+</sup> [M + H]<sup>+</sup> 446.1533, found 446.1533; HPLC analysis: **4ea**, 82% ee (IE, isopropanol : hexane=40 : 60, 1 mL/min, UV: 254 nm), *t<sub>R</sub>* =20.5 min (major), 24.0 min (minor).

**(9S,14aS)-13-ethoxy-2-fluoro-8-tosyl-9-vinyl-8,9-dihydro-14aH-benzo[6,7][1,3,4]oxadiazepino[3,2-c]quinazoline (4bb)**

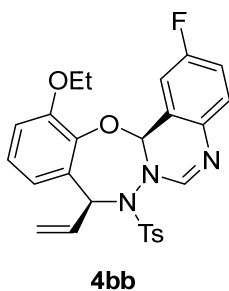

Prepared according to the general procedure as described above in 93% yield (45.9 mg). It was purified by flash chromatography (30% EtOAc/PE) to afford a light yellow solid. Melting point: 131–132 °C;  $[\alpha]_D^{25} = +64$  (*c* 0.5, CH<sub>2</sub>Cl<sub>2</sub>); <sup>1</sup>H NMR (500 MHz, CDCl<sub>3</sub>) δ 7.59 (d, *J* = 8.2 Hz, 2H), 7.33 – 7.05 (m, 6H), 7.04 – 6.83 (m, 3H), 6.16 (ddd, *J* = 16.8, 10.2, 6.2 Hz, 1H), 6.03 – 6.01 (m, 1H), 6.01 – 5.97 (m, 1H), 5.34 (d, *J* = 10.2 Hz, 1H), 5.25 (d, *J* = 17.1 Hz, 1H), 4.06 (h, *J* = 7.0 Hz, 2H), 2.39 (s, 3H), 1.48 (t, *J* = 7.0 Hz, 3H); <sup>13</sup>C NMR (126 MHz, CDCl<sub>3</sub>) δ 160.6 (C-F, <sup>1</sup>*J*<sub>C-F</sub> = 245.9 Hz), 151.6, 147.5 (C-F, <sup>3</sup>*J*<sub>C-F</sub> = 2.1 Hz), 147.1, 145.2, 136.2 (C-F, <sup>3</sup>*J*<sub>C-F</sub> = 2.7 Hz), 134.5, 133.0, 131.8, 129.9, 128.2, 127.8 (C-F, <sup>2</sup>*J*<sub>C-F</sub> = 8.4 Hz), 125.8, 122.6 (C-F, <sup>3</sup>*J*<sub>C-F</sub> = 8.4 Hz), 122.1, 121.0, 117.9 (C-F, <sup>2</sup>*J*<sub>C-F</sub> = 22.7 Hz), 114.8 (C-F, <sup>2</sup>*J*<sub>C-F</sub> = 23.7 Hz), 113.7, 85.6 (C-F, <sup>3</sup>*J*<sub>C-F</sub> = 2.0 Hz), 67.3, 64.4, 21.7, 14.8; <sup>19</sup>F NMR (471 MHz, CDCl<sub>3</sub>) δ -115.46; IR (film)  $\nu_{\max}$  1617, 1491, 1346, 1277, 1205, 1166, 1091, 946, 868 cm<sup>-1</sup>; HRMS (ESI) calculated for C<sub>26</sub>H<sub>25</sub>FN<sub>3</sub>O<sub>4</sub>S [M + H] 494.1550, found 494.1543. HPLC analysis: **4bb**, 95% ee (IC, isopropanol : hexane=30 : 70, 1 mL/min, UV: 254 nm), *t<sub>R</sub>* =9.4 min (major), 13.1 min (minor).

**(9S,14aS)-13-ethoxy-1-methyl-8-tosyl-9-vinyl-8,9-dihydro-14aH-benzo[6,7][1,3,4]oxadiazepino[3,2-c]quinazoline (4bd)**

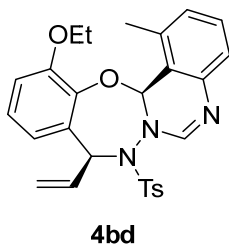

Prepared according to the general procedure as described above in 85% yield (41.6 mg). It was purified by flash chromatography (30% EtOAc/PE) to afford a light yellow solid. Melting point: 136–137 °C;  $[\alpha]_D^{25} = +96$  (*c* 0.5, CH<sub>2</sub>Cl<sub>2</sub>); <sup>1</sup>H NMR (500 MHz, CDCl<sub>3</sub>) δ 7.68 – 7.45 (m, 2H), 7.28 – 6.98 (m, 6H), 6.87 (ddd, *J* = 25.9, 8.0, 1.4 Hz, 2H), 6.74 (d, *J* = 1.4 Hz, 1H), 6.10 (ddd, *J* = 16.9, 10.2, 6.3 Hz, 1H), 6.03 (d, *J* = 1.4 Hz, 1H), 5.91 (dt, *J* = 6.5, 1.5 Hz, 1H), 5.25 (d, *J* = 10.2 Hz, 1H), 5.18 (d, *J* = 17.0 Hz, 1H), 4.05 – 3.93 (m, 2H), 2.32 (s, 3H), 2.31 (s, 3H), 1.42 (t, *J* = 6.9 Hz, 3H); <sup>13</sup>C NMR (126 MHz, CDCl<sub>3</sub>) δ 150.7, 146.5, 146.3, 144.0, 136.4, 135.0, 133.6, 132.2, 130.8, 130.3, 128.9, 128.0, 127.2, 124.8, 124.5, 121.0, 120.12, 119.98, 112.6, 85.2, 66.2, 63.3, 20.6, 20.1, 13.9; IR (film)  $\nu_{\max}$  1610, 1496, 1276, 1196, 1164, 1089, 1016, 935, 801 cm<sup>-1</sup>; HRMS (ESI) calculated for C<sub>27</sub>H<sub>28</sub>N<sub>3</sub>O<sub>4</sub>S [M + H] 490.1801, found 490.1804; HPLC analysis: **4bd**, 94% ee (IC, isopropanol : hexane=30 : 70, 1 mL/min, UV: 254 nm), *t<sub>R</sub>* =13.8 min (major), 17.0 min (minor).

**(9S,14aS)-13-ethoxy-3-methoxy-8-tosyl-9-vinyl-8,9-dihydro-14aH-benzo[6,7][1,3,4]oxadiazepino[3,2-c]quinazoline (4be)**

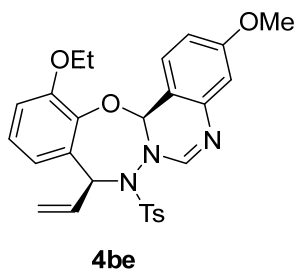

**4be**

Prepared according to the general procedure as described above in 46% yield (23.3 mg). It was purified by flash chromatography (30% EtOAc/PE) to afford a light yellow solid. Melting point: 144–145 °C;  $[\alpha]_D^{25} = +24$  (*c* 0.5, CH<sub>2</sub>Cl<sub>2</sub>); <sup>1</sup>H NMR (500 MHz, CDCl<sub>3</sub>) δ 7.68 – 7.52 (m, 2H), 7.31 (d, *J* = 8.6 Hz, 1H), 7.14 (dd, *J* = 41.9, 7.9 Hz, 3H), 7.01 – 6.76 (m, 5H), 6.18 (ddd, *J* = 16.8, 10.2, 6.3 Hz, 1H), 6.05 – 5.93 (m, 2H), 5.41 – 5.31 (m, 1H), 5.31 – 5.22 (m, 1H), 4.09 – 4.00 (m, 2H), 3.83 (s, 3H), 2.39 (s, 3H), 1.44 (t, *J* = 6.9 Hz, 3H); <sup>13</sup>C NMR (126 MHz, CDCl<sub>3</sub>) δ 161.3, 151.7, 148.5, 147.3, 145.0, 141.1, 134.6, 133.1, 131.9, 129.9, 129.7, 128.2, 125.5, 122.1, 121.1, 114.0, 113.9, 109.1, 86.1, 67.3, 64.4, 55.5, 21.7, 14.9; IR (film)  $\nu_{\max}$  1609, 1498, 1469, 1279, 1164, 1088, 1015, 933, 798 cm<sup>-1</sup>; HRMS (ESI) calculated for C<sub>27</sub>H<sub>28</sub>N<sub>3</sub>O<sub>5</sub>S [M + H] 506.1750, found 506.1750; HPLC analysis: **4be**, 90% ee (ID, isopropanol : hexane=60 : 40, 1 mL/min, UV: 254 nm), *t<sub>R</sub>* = 21.8 min (major), 45.7 min (minor).

**(9S,14aS)-13-ethoxy-8-(mesitylsulfonyl)-9-vinyl-8,9-dihydro-14aH-benzo[6,7][1,3,4]oxadiazepino[3,2-c]quinazoline (4bf)**

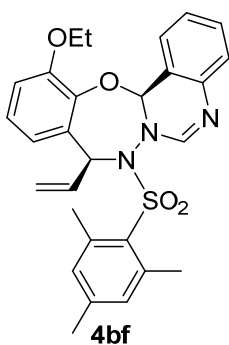

**4bf**

Prepared according to the general procedure as described above in 98% yield (49.5 mg). It was purified by flash chromatography (25% EtOAc/PE) to afford a white solid. Melting point: 168–169 °C;  $[\alpha]_D^{25} = +160$  (*c* 0.5, CH<sub>2</sub>Cl<sub>2</sub>); <sup>1</sup>H NMR (500 MHz, CDCl<sub>3</sub>) δ 7.51 (dd, *J* = 7.7, 1.5 Hz, 1H), 7.42 – 7.15 (m, 3H), 7.05 (t, *J* = 7.9 Hz, 1H), 6.96 – 6.78 (m, 4H), 6.70 (d, *J* = 1.4 Hz, 1H), 6.49 (d, *J* = 1.4 Hz, 1H), 6.18 (ddd, *J* = 17.0, 10.2, 6.8 Hz, 1H), 5.91 (dd, *J* = 6.8, 1.3 Hz, 1H), 5.35 – 5.10 (m, 2H), 4.02 (dt, *J* = 16.0, 9.1, 7.0 Hz, 2H), 2.41 (s, 6H), 2.20 (s, 3H), 1.42 (t, *J* = 7.0 Hz, 3H); <sup>13</sup>C NMR (126 MHz, CDCl<sub>3</sub>) δ 150.6, 146.6, 146.4, 143.0, 139.8, 138.5, 132.4, 131.3, 130.6, 129.4, 127.9, 125.2, 124.8, 124.7, 120.9, 120.4, 119.8, 112.6, 85.6, 65.7, 63.2, 21.7, 20.1, 13.9; IR (film)  $\nu_{\max}$  1620, 1604, 1486, 1332, 1205, 1177, 931, 863 cm<sup>-1</sup>; HRMS (ESI) calculated for C<sub>28</sub>H<sub>30</sub>N<sub>3</sub>O<sub>4</sub>S [M + H] 504.1957, found 504.1961; HPLC analysis: **4bf**, 92% ee (IE, isopropanol : hexane=40 : 60, 1 mL/min, UV: 254 nm), *t<sub>R</sub>* = 7.5 min (major), 8.5 min (minor).

**(9S,14aS)-8-((4-(tert-butyl)phenyl)sulfonyl)-13-ethoxy-9-vinyl-8,9-dihydro-14aH-benzo-[6,7][1,3,4]oxadiazepino[3,2-c]quinazoline (4bg)**

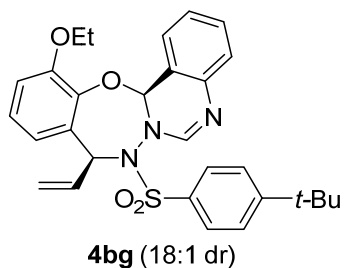

Prepared according to the general procedure as described above in 92% yield (47.6 mg, 18:1 dr). It was purified by flash chromatography (25% EtOAc/PE) to afford a white solid. Melting point: 142–143 °C;  $[\alpha]_D^{25} = +24$  (*c* 0.5, CH<sub>2</sub>Cl<sub>2</sub>); <sup>1</sup>H NMR (500 MHz, CDCl<sub>3</sub>) δ 7.62 – 7.53 (m, 2H), 7.47 – 7.21 (m, 6H), 7.17 – 6.83 (m, 4H), 6.20 (ddd, *J* = 16.8, 10.2, 6.3 Hz, 1H), 5.99 (dt, *J* = 6.3, 1.5 Hz, 1H), 5.69 (d, *J* = 1.4 Hz, 1H), 5.35 (d, *J* = 10.2 Hz, 1H), 5.26 (dt, *J* = 17.1, 1.1 Hz, 1H), 4.02 (q, *J* = 7.0 Hz, 2H), 1.43 (t, *J* = 7.0 Hz, 3H), 1.29 (s, 9H); <sup>13</sup>C NMR (126 MHz, CDCl<sub>3</sub>) δ 158.0, 151.7, 148.4, 147.3, 139.8, 134.5, 133.0, 131.9, 130.5, 128.7, 128.0, 126.2, 126.1, 126.0, 125.5, 122.1, 121.3, 121.2, 113.6, 85.9, 67.6, 64.3, 35.2, 31.0, 14.9; IR (film)  $\nu_{\max}$  1620, 1605, 1486, 1361, 1204, 1173, 1086, 931, 862, cm<sup>-1</sup>; HRMS (ESI) calculated for C<sub>29</sub>H<sub>32</sub>N<sub>3</sub>O<sub>4</sub>S [M + H] 518.2114, found 518.2112; HPLC analysis: **4bg**, 94% ee (IC, isopropanol : hexane=40 : 60, 1 mL/min, UV: 254 nm), *t<sub>R</sub>* =9.2 min (major), 11.3 min (minor)

**(9S,14aS)-13-ethoxy-8-((4-methoxyphenyl)sulfonyl)-9-vinyl-8,9-dihydro-14aH-benzo-[6,7][1,3,4]oxadiazepino[3,2-c]quinazoline (4bh)**

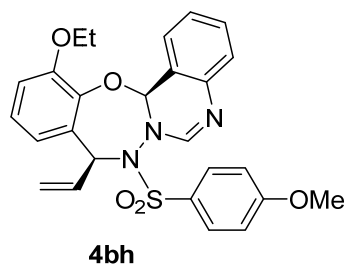

Prepared according to the general procedure as described above in 72% yield (35.4 mg). It was purified by flash chromatography (5% EtOAc/PE) to afford a light yellow solid. Melting point: 138–139 °C;  $[\alpha]_D^{25} = +56$  (*c* 0.5, CH<sub>2</sub>Cl<sub>2</sub>); <sup>1</sup>H NMR (500 MHz, CDCl<sub>3</sub>) δ 7.63 – 7.49 (m, 2H), 7.40 – 7.19 (m, 4H), 7.09 – 6.68 (m, 5H), 6.11 (ddd, *J* = 16.8, 10.2, 6.3 Hz, 1H), 5.98 (d, *J* = 1.4 Hz, 1H), 5.92 (dt, *J* = 6.2, 1.5 Hz, 1H), 5.27 (d, *J* = 10.2 Hz, 1H), 5.18 (d, *J* = 17.0 Hz, 1H), 3.98 (dt, *J* = 16.1, 9.2, 7.0 Hz, 2H), 3.75 (s, 3H), 1.38 (t, *J* = 7.0 Hz, 3H); <sup>13</sup>C NMR (126 MHz, CDCl<sub>3</sub>) δ 162.8, 150.6, 147.3, 146.4, 138.7, 132.0, 130.9, 129.4, 127.8, 127.7, 125.1, 125.0, 124.5, 121.0, 120.3, 120.0, 113.4, 112.8, 85.0, 66.3, 63.4, 54.7, 13.8; IR (film)  $\nu_{\max}$  1604, 1486, 1356, 1205, 1161, 1092, 932, 835 cm<sup>-1</sup>; HRMS (ESI) calculated for C<sub>26</sub>H<sub>26</sub>N<sub>3</sub>O<sub>5</sub>S [M + H] 492.1593, found 492.1591; HPLC analysis: **4bh**, 94% ee (IC, isopropanol : hexane=40 : 60, 1 mL/min, UV: 254 nm), *t<sub>R</sub>* =10.9 min (major), 13.6 min (minor).



**9-(1,2-dibromoethyl)-8-tosyl-8,9-dihydro-14aH-benzo[6,7][1,3,4]oxadiazepino[3,2-c]quinazoline (5a)**

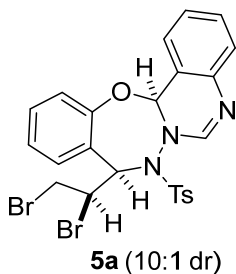

Prepared according to the general procedure as described above in 32% yield (18.9 mg, 10:1 dr). It was purified by flash chromatography (15% EtOAc/PE) to afford a white solid. Melting point: 172–173 °C; <sup>1</sup>H NMR (500 MHz, CDCl<sub>3</sub>) δ 7.73–7.63 (m, 3H), 7.61 (dd, *J* = 7.6, 1.7 Hz, 7H), 7.40 (ddd, *J* = 8.3, 6.9, 1.9 Hz, 2H), 7.34–7.20 (m, 1H), 7.17 (dd, *J* = 7.5, 1.2 Hz, 1H), 7.05 (dd, *J* = 8.0, 1.2 Hz, 1H), 5.67 (d, *J* = 10.5 Hz, 1H), 4.79 (d, *J* = 10.5 Hz, 1H), 3.50 (dd, *J* = 12.0, 3.3 Hz, 1H), 2.98 (dd, *J* = 11.9, 3.2 Hz, 1H), 2.35 (s, 3H); <sup>13</sup>C NMR (126 MHz, CDCl<sub>3</sub>) δ 157.0, 145.7, 144.5, 138.3, 132.8, 130.6, 130.3, 129.8, 129.0, 127.6, 127.4, 127.2, 125.6, 125.3, 124.5, 121.2, 119.9, 86.4, 68.4, 48.5, 36.2, 20.7; HRMS (ESI) calculated for C<sub>24</sub>H<sub>22</sub>Br<sub>2</sub>N<sub>3</sub>O<sub>3</sub>S<sup>+</sup> [M + H]<sup>+</sup> 589.9743, found 589.9749.

**13-bromo-9-1,2-dibromoethyl)-8-tosyl-8,9-dihydro-14aH-benzo[6,7][1,3,4]oxadiazepino[3,2-c]quinazoline (5b)**

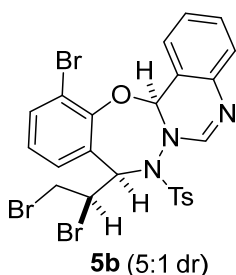

Prepared according to the general procedure as described above in 56% yield (37.3 mg, 5:1 dr). It was purified by flash chromatography (20% EtOAc/PE) to afford a white solid. Melting point: 138–139 °C; <sup>1</sup>H NMR (500 MHz, CDCl<sub>3</sub>) δ 7.67 (d, *J* = 8.3 Hz, 2H), 7.52–7.39 (m, 2H), 7.39–7.18 (m, 7H), 7.09 (dd, *J* = 8.0, 1.2 Hz, 1H), 6.89 (d, *J* = 1.4 Hz, 1H), 6.22 (d, *J* = 1.4 Hz, 1H), 5.89 (d, *J* = 9.4 Hz, 1H), 4.87–4.62 (m, 1H), 4.04–3.78 (m, 2H), 2.41 (s, 3H); <sup>13</sup>C NMR (126 MHz, CDCl<sub>3</sub>) δ 158.5, 146.0, 145.9, 139.2, 133.7, 132.4, 130.9, 130.8, 130.2, 129.5, 128.6, 128.4, 126.8, 126.3, 124.9, 121.8, 121.0, 87.2, 66.9, 49.6, 36.5, 21.8; HRMS (ESI) calculated for C<sub>24</sub>H<sub>22</sub>Br<sub>3</sub>N<sub>3</sub>O<sub>3</sub>S<sup>+</sup> [M + H]<sup>+</sup> 667.8848, found 667.8840.

**9-vinyl-8,9-dihydro-14aH-benzo[6,7][1,3,4]oxadiazepino[3,2-c]quinazoline (6)**

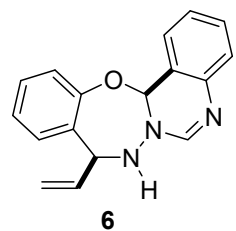

Prepared according to the general procedure as described above in 61% yield (16.9 mg). It was purified by flash chromatography (75% EtOAc/PE) to afford a light yellow solid. Melting point: 191–192 °C; <sup>1</sup>H NMR (500 MHz, DMSO-*d*<sub>6</sub>) δ 10.24 (s, 1H), 7.83 (s, 1H), 7.60–7.47 (m, 1H), 7.23–6.99 (m, 6H), 6.86 (dd, *J* = 8.1, 1.2 Hz, 1H), 6.78–6.67 (m, 2H), 6.39 (ddd, *J* = 17.3, 10.3, 8.9 Hz, 1H), 5.81–5.51 (m, 1H), 5.45 (dd, *J* = 17.3, 1.2 Hz, 1H); <sup>13</sup>C NMR (126 MHz, DMSO-*d*<sub>6</sub>) δ 153.1, 148.8, 142.1, 139.7, 134.5, 129.6, 128.6, 128.3, 127.6, 127.3, 127.0, 126.2, 125.7, 124.1, 120.6, 116.1, 52.0; HRMS (ESI) calculated for C<sub>17</sub>H<sub>15</sub>N<sub>3</sub>O [M + H] 278.1293, found 278.1292..

# $^1\text{H}$ and $^{13}\text{C}$ NMR Spectra of New Substrates

## $^1\text{H}$ NMR spectrum (500 MHz, $\text{CDCl}_3$ )

7.41, 7.40, 7.39, 7.37, 7.35, 7.28, 7.26, 7.25, 7.24, 7.23, 7.22, 7.21, 7.19, 7.18, 7.15, 7.12, 7.11, 7.10, 7.07, 6.06, 6.03, 6.01, 5.89, 5.87, 5.85, 5.84, 5.81, 5.81

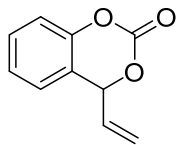

**1a**

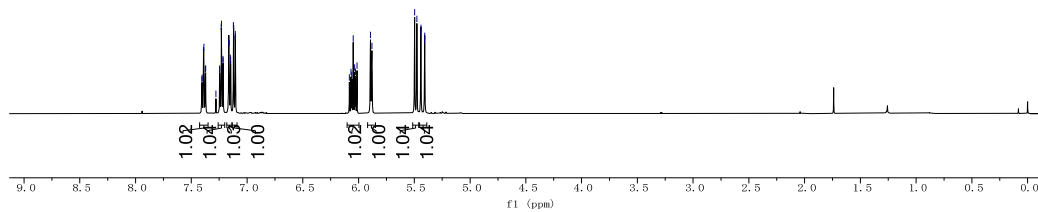

## $^{13}\text{C}$ NMR (126 MHz, $\text{CDCl}_3$ )

148.82, 146.52, 133.08, 130.22, 125.34, 125.07, 121.77, 119.83, 116.26, 80.24

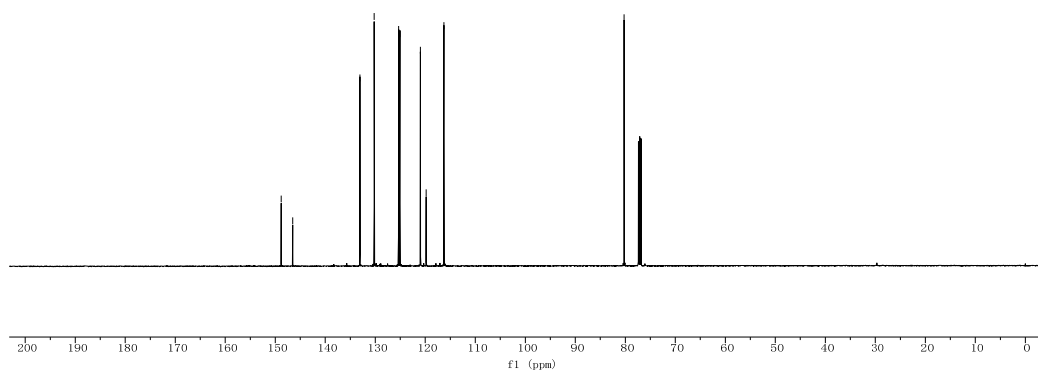

<sup>1</sup>H NMR spectrum (500 MHz, CDCl<sub>3</sub>)

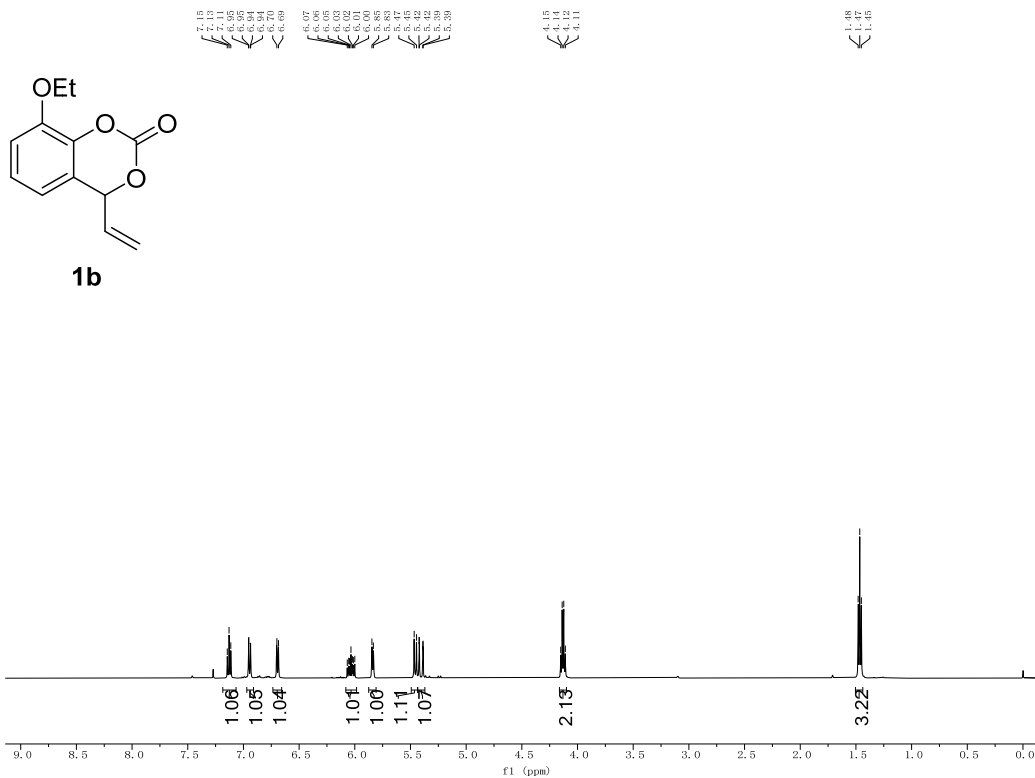

<sup>13</sup>C NMR (126 MHz, CDCl<sub>3</sub>)

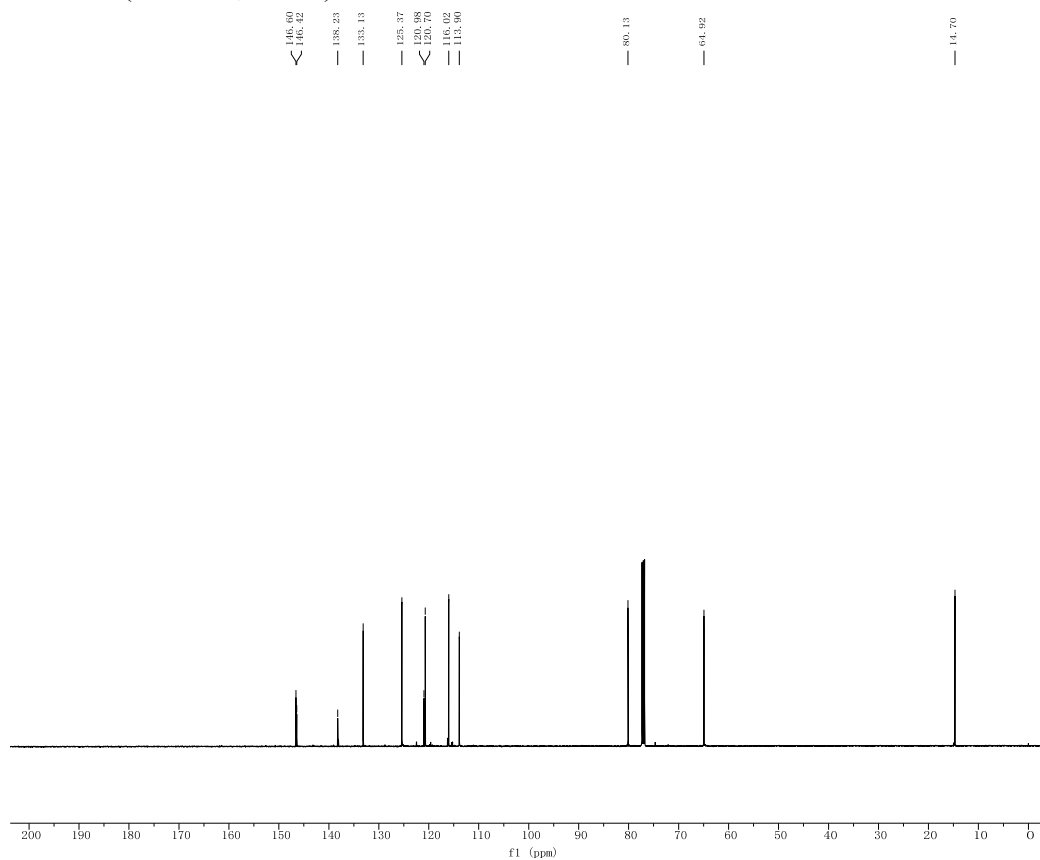

<sup>1</sup>H NMR spectrum (500 MHz, CDCl<sub>3</sub>)

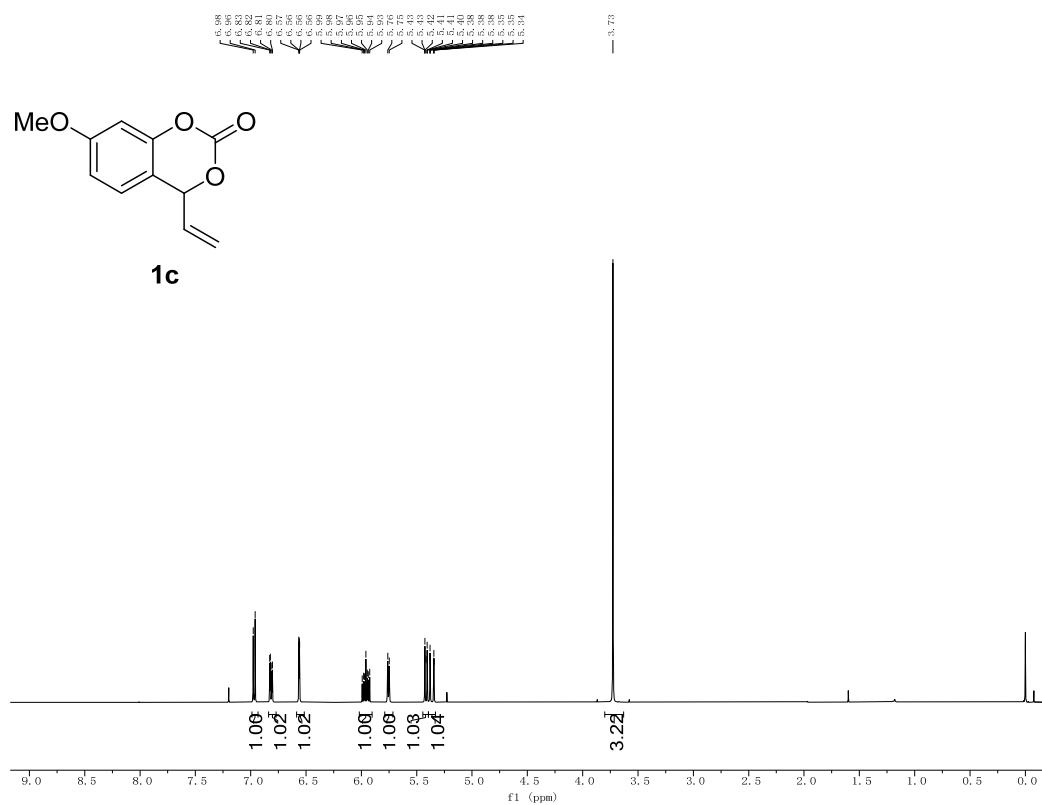

<sup>13</sup>C NMR (126 MHz, CDCl<sub>3</sub>)

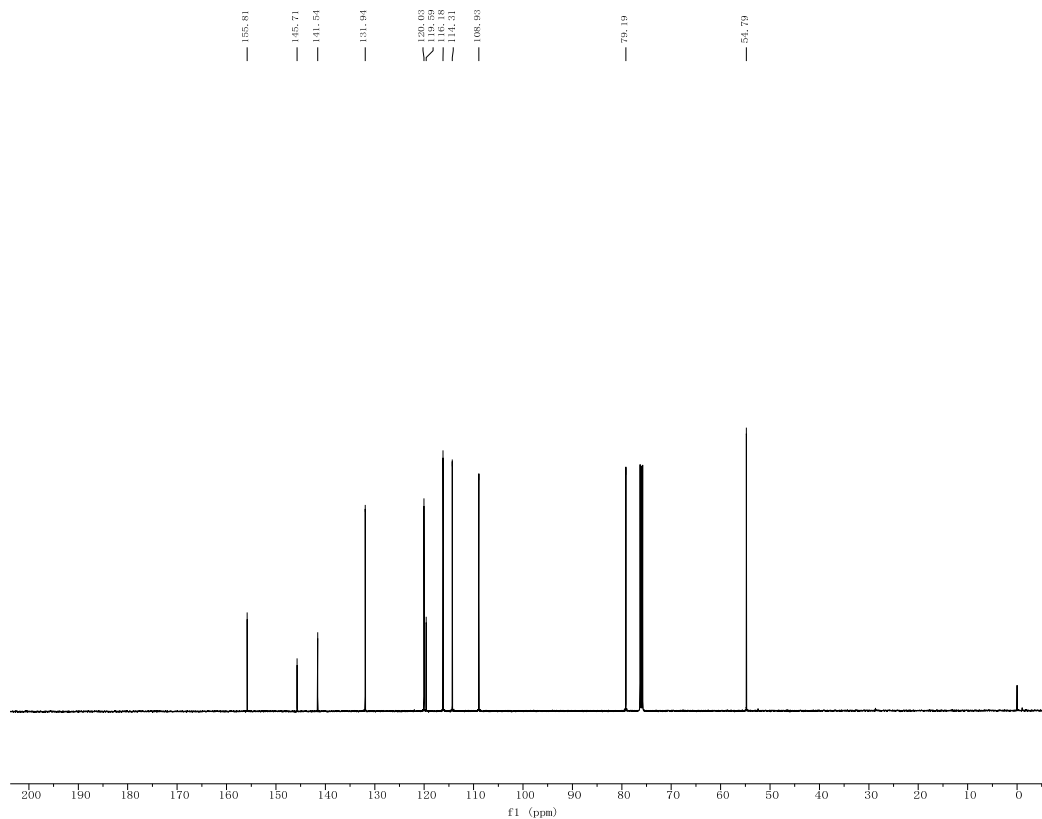

<sup>1</sup>H NMR spectrum (500 MHz, CDCl<sub>3</sub>)

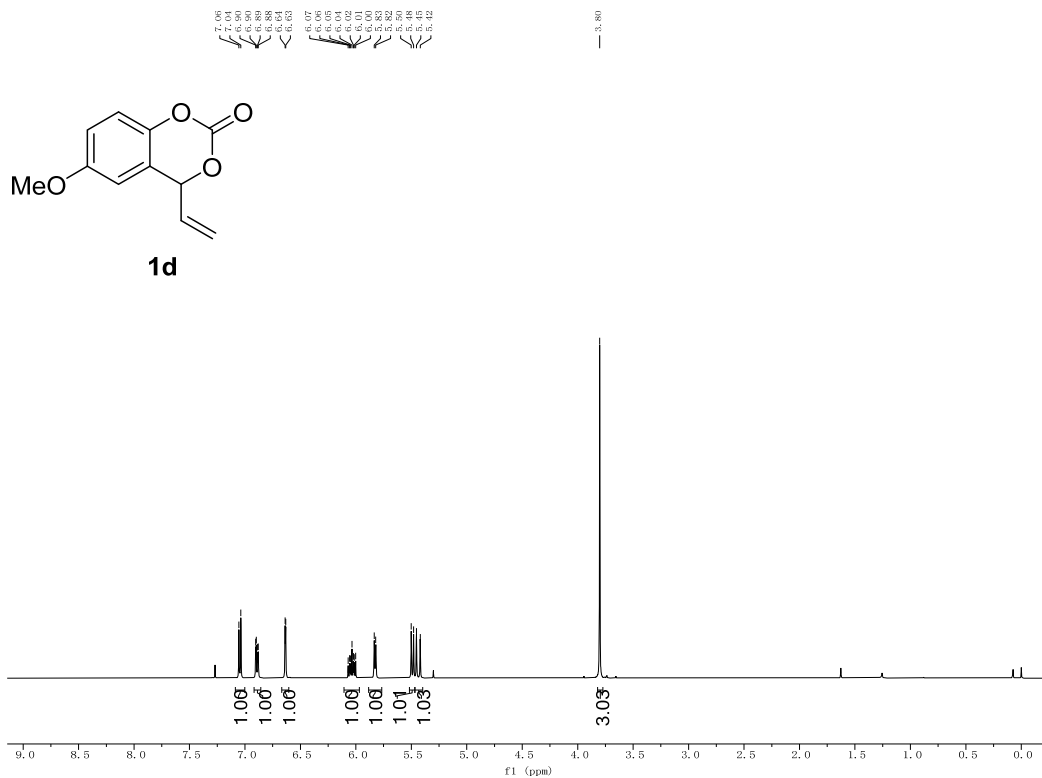

<sup>13</sup>C NMR (126 MHz, CDCl<sub>3</sub>)

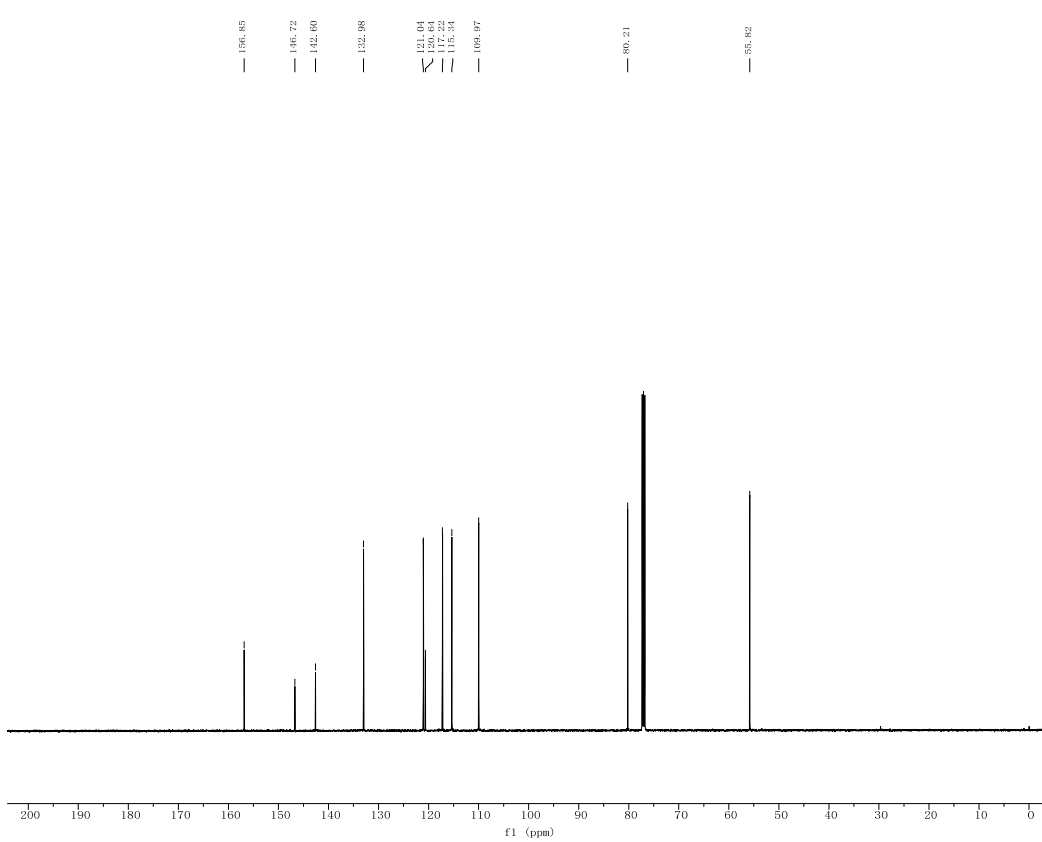

<sup>1</sup>H NMR spectrum (500 MHz, CDCl<sub>3</sub>)

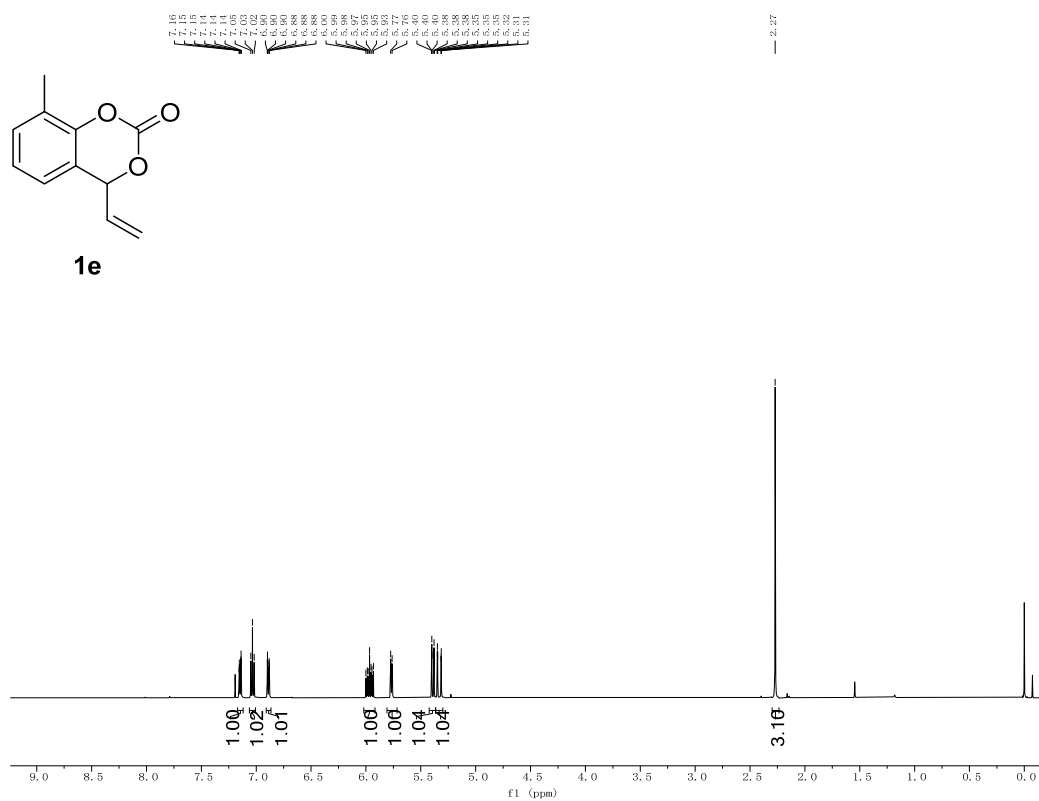

<sup>13</sup>C NMR (126 MHz, CDCl<sub>3</sub>)

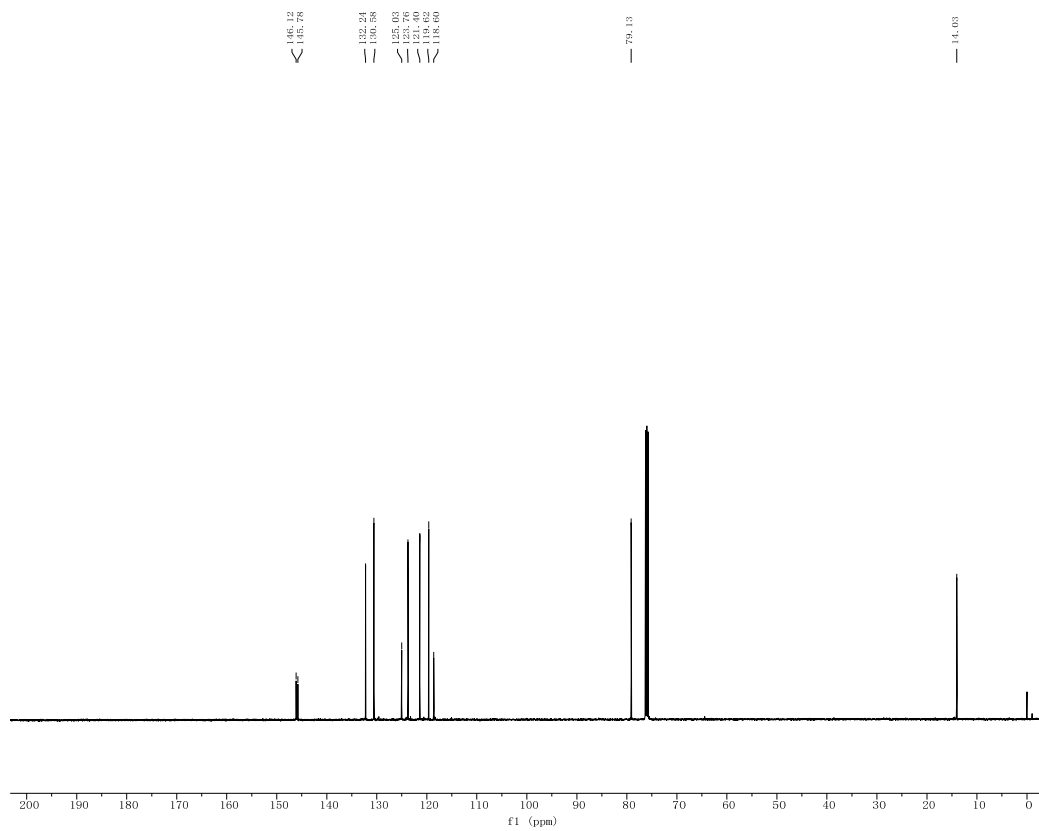

<sup>1</sup>H NMR spectrum (500 MHz, CDCl<sub>3</sub>)

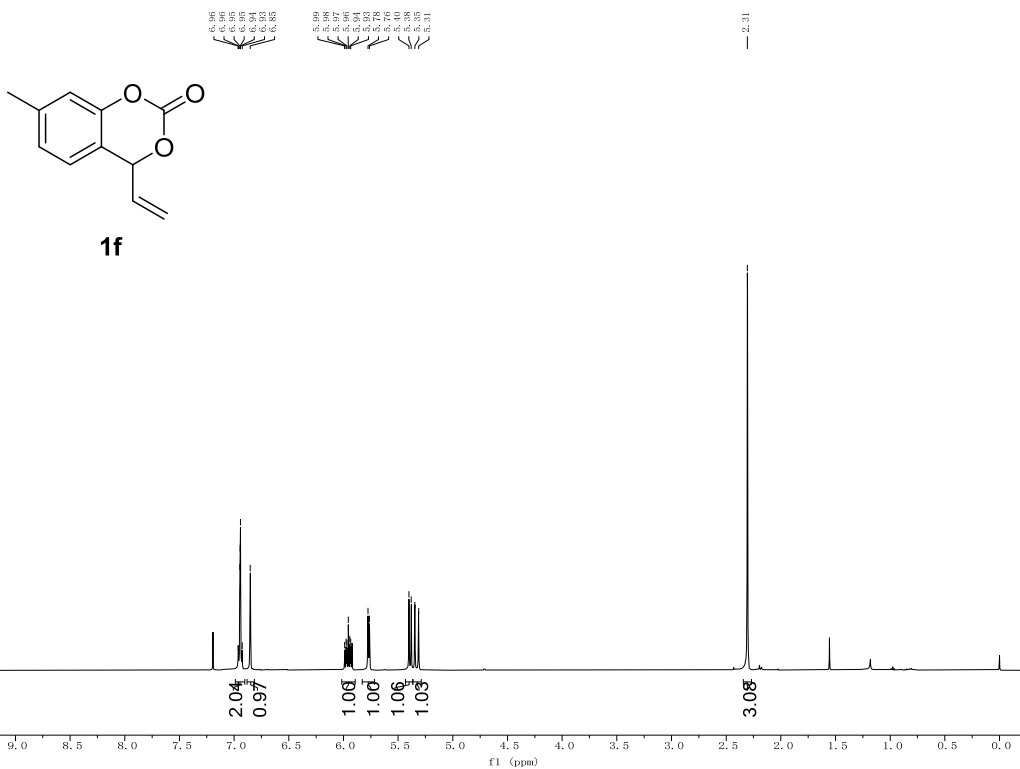

<sup>13</sup>C NMR (126 MHz, CDCl<sub>3</sub>)

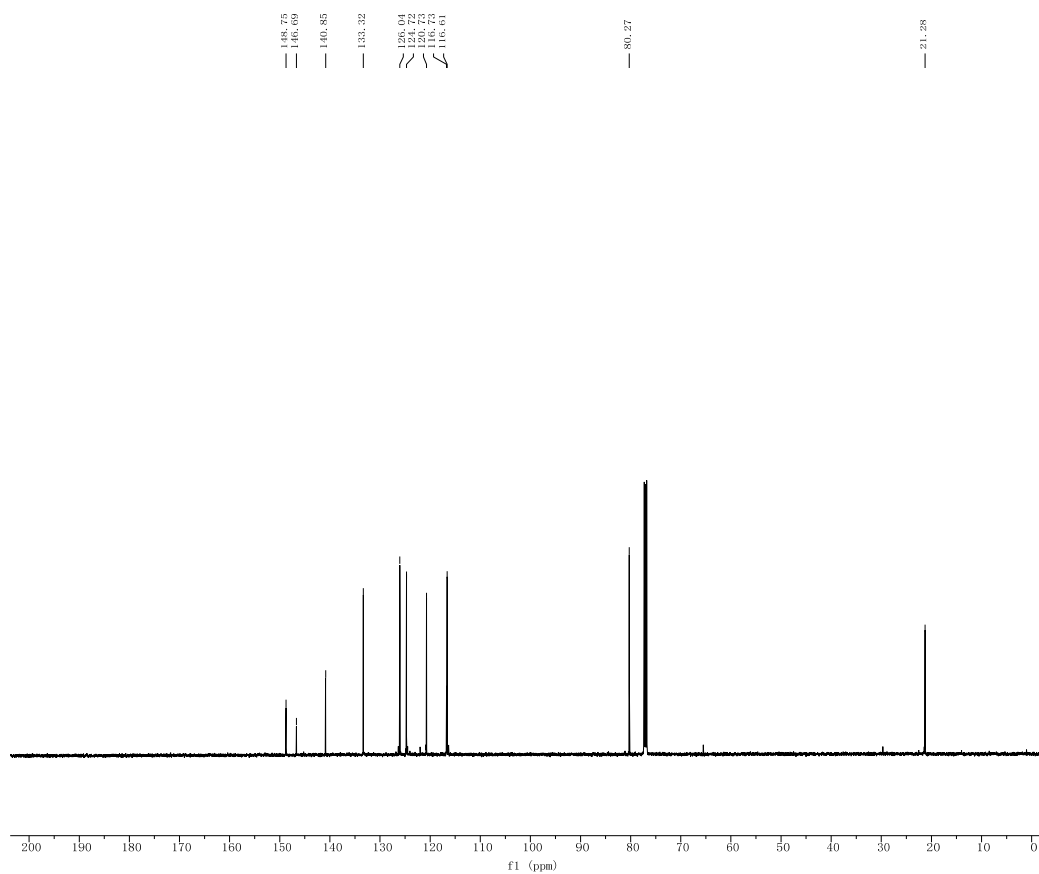

<sup>1</sup>H NMR spectrum (500 MHz, CDCl<sub>3</sub>)

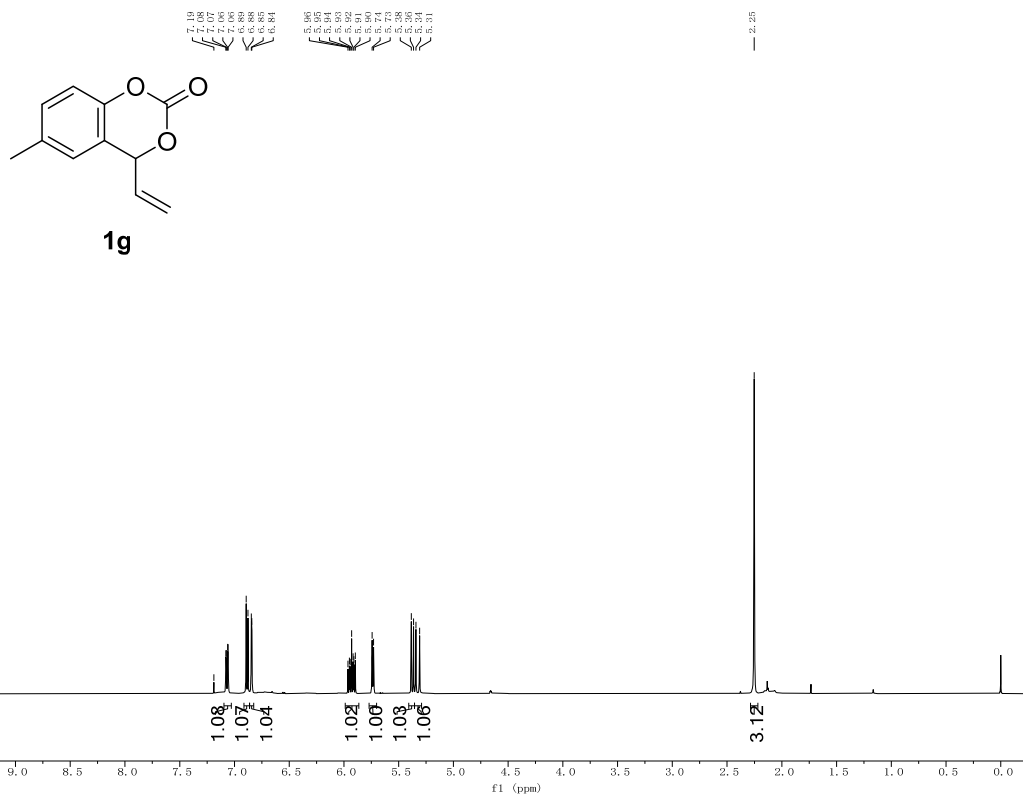

<sup>13</sup>C NMR (126 MHz, CDCl<sub>3</sub>)

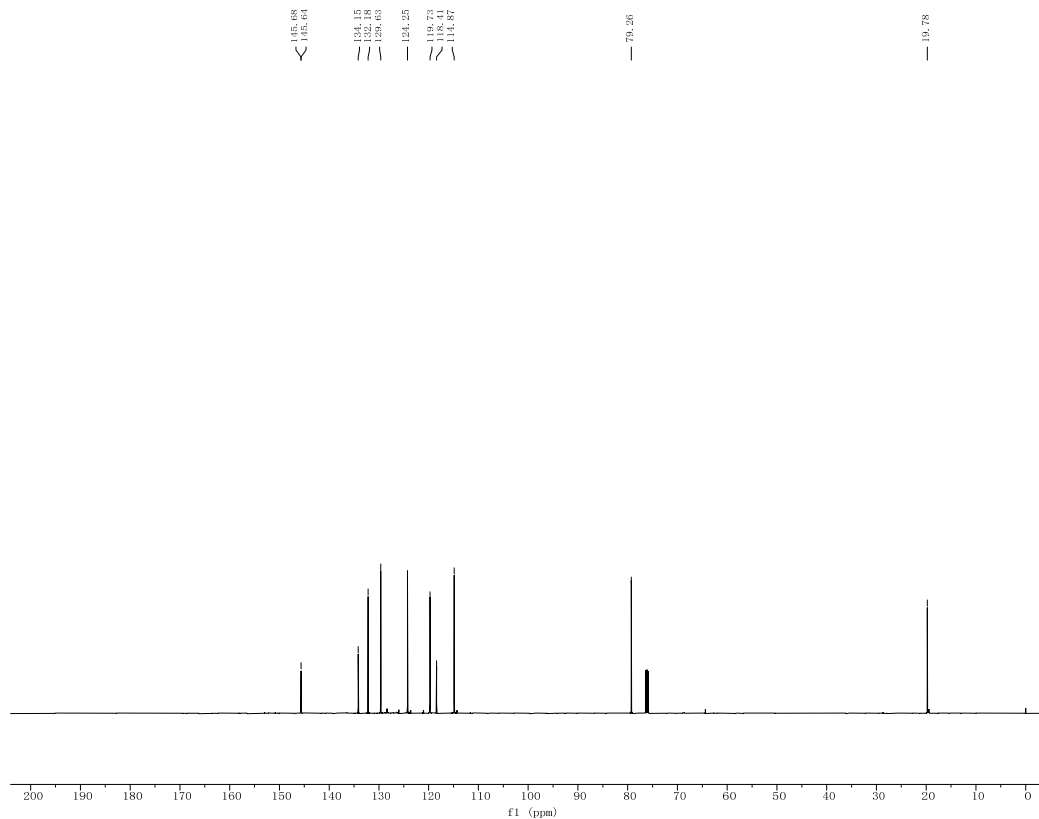





<sup>1</sup>H NMR spectrum (500 MHz, CDCl<sub>3</sub>)

7.05, 7.03, 7.00, 6.98, 6.96, 6.94, 6.92, 6.90, 6.88, 6.86, 6.84, 6.82, 6.80, 6.78, 6.76, 6.74, 6.72, 6.70, 6.68, 6.66, 6.64, 6.62, 6.60, 6.58, 6.56, 6.54, 6.52, 6.50, 6.48, 6.46, 6.44, 6.42, 6.40, 6.38, 6.36, 6.34, 6.32, 6.30, 6.28, 6.26, 6.24, 6.22, 6.20, 6.18, 6.16, 6.14, 6.12, 6.10, 6.08, 6.06, 6.04, 6.02, 6.00, 5.98, 5.96, 5.94, 5.92, 5.90, 5.88, 5.86, 5.84, 5.82, 5.80, 5.78, 5.76, 5.74, 5.72, 5.70, 5.68, 5.66, 5.64, 5.62, 5.60, 5.58, 5.56, 5.54, 5.52, 5.50, 5.48, 5.46, 5.44, 5.42, 5.40, 5.38, 5.36, 5.34, 5.32, 5.30, 5.28, 5.26, 5.24, 5.22, 5.20, 5.18, 5.16, 5.14, 5.12, 5.10, 5.08, 5.06, 5.04, 5.02, 5.00, 4.98, 4.96, 4.94, 4.92, 4.90, 4.88, 4.86, 4.84, 4.82, 4.80, 4.78, 4.76, 4.74, 4.72, 4.70, 4.68, 4.66, 4.64, 4.62, 4.60, 4.58, 4.56, 4.54, 4.52, 4.50, 4.48, 4.46, 4.44, 4.42, 4.40, 4.38, 4.36, 4.34, 4.32, 4.30, 4.28, 4.26, 4.24, 4.22, 4.20, 4.18, 4.16, 4.14, 4.12, 4.10, 4.08, 4.06, 4.04, 4.02, 4.00, 3.98, 3.96, 3.94, 3.92, 3.90, 3.88, 3.86, 3.84, 3.82, 3.80, 3.78, 3.76, 3.74, 3.72, 3.70, 3.68, 3.66, 3.64, 3.62, 3.60, 3.58, 3.56, 3.54, 3.52, 3.50, 3.48, 3.46, 3.44, 3.42, 3.40, 3.38, 3.36, 3.34, 3.32, 3.30, 3.28, 3.26, 3.24, 3.22, 3.20, 3.18, 3.16, 3.14, 3.12, 3.10, 3.08, 3.06, 3.04, 3.02, 3.00, 2.98, 2.96, 2.94, 2.92, 2.90, 2.88, 2.86, 2.84, 2.82, 2.80, 2.78, 2.76, 2.74, 2.72, 2.70, 2.68, 2.66, 2.64, 2.62, 2.60, 2.58, 2.56, 2.54, 2.52, 2.50, 2.48, 2.46, 2.44, 2.42, 2.40, 2.38, 2.36, 2.34, 2.32, 2.30, 2.28, 2.26, 2.24, 2.22, 2.20, 2.18, 2.16, 2.14, 2.12, 2.10, 2.08, 2.06, 2.04, 2.02, 2.00, 1.98, 1.96, 1.94, 1.92, 1.90, 1.88, 1.86, 1.84, 1.82, 1.80, 1.78, 1.76, 1.74, 1.72, 1.70, 1.68, 1.66, 1.64, 1.62, 1.60, 1.58, 1.56, 1.54, 1.52, 1.50, 1.48, 1.46, 1.44, 1.42, 1.40, 1.38, 1.36, 1.34, 1.32, 1.30, 1.28, 1.26, 1.24, 1.22, 1.20, 1.18, 1.16, 1.14, 1.12, 1.10, 1.08, 1.06, 1.04, 1.02, 1.00, 0.98, 0.96, 0.94, 0.92, 0.90, 0.88, 0.86, 0.84, 0.82, 0.80, 0.78, 0.76, 0.74, 0.72, 0.70, 0.68, 0.66, 0.64, 0.62, 0.60, 0.58, 0.56, 0.54, 0.52, 0.50, 0.48, 0.46, 0.44, 0.42, 0.40, 0.38, 0.36, 0.34, 0.32, 0.30, 0.28, 0.26, 0.24, 0.22, 0.20, 0.18, 0.16, 0.14, 0.12, 0.10, 0.08, 0.06, 0.04, 0.02, 0.00

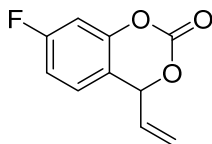

**1i**

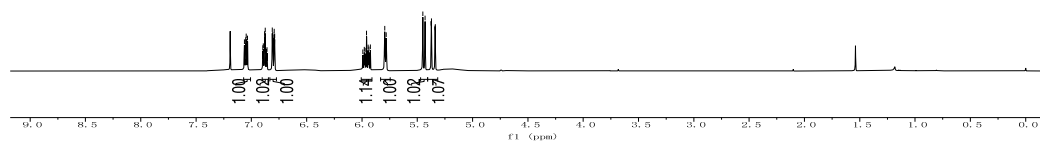

<sup>13</sup>C NMR (126 MHz, CDCl<sub>3</sub>)

164.19, 162.21, 146.22, 145.27, 132.81, 126.29, 125.52, 121.42, 115.29, 112.57, 112.59, 104.98, 80.05

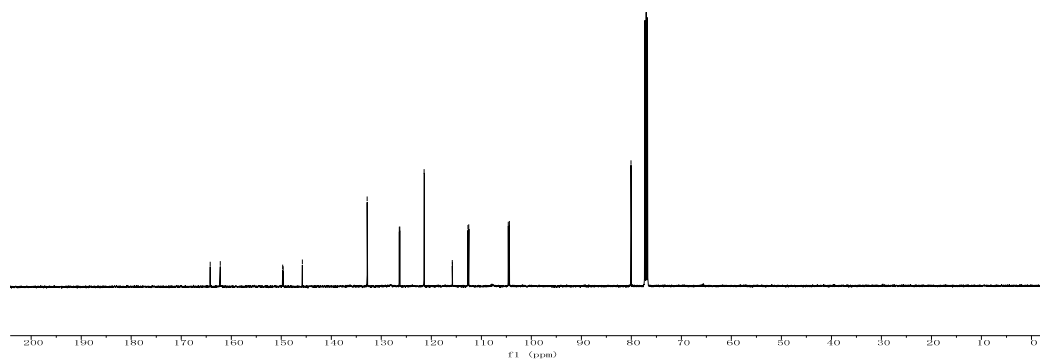

<sup>19</sup>F NMR (471 MHz, CDCl<sub>3</sub>)

-111.8

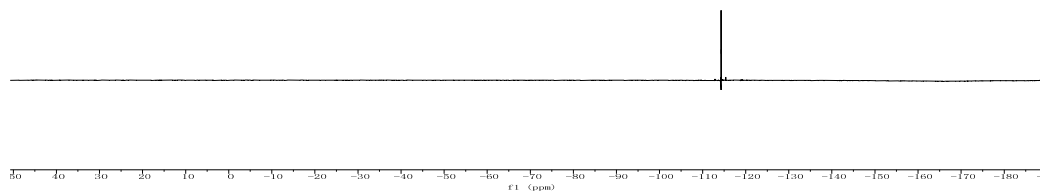

<sup>1</sup>H NMR spectrum (500 MHz, CDCl<sub>3</sub>)

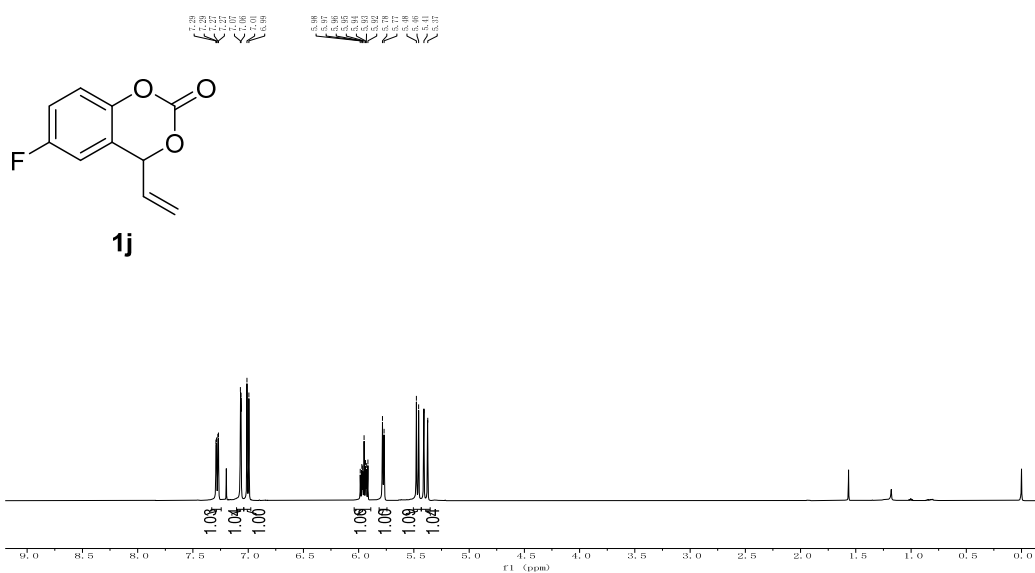

<sup>13</sup>C NMR (126 MHz, CDCl<sub>3</sub>)

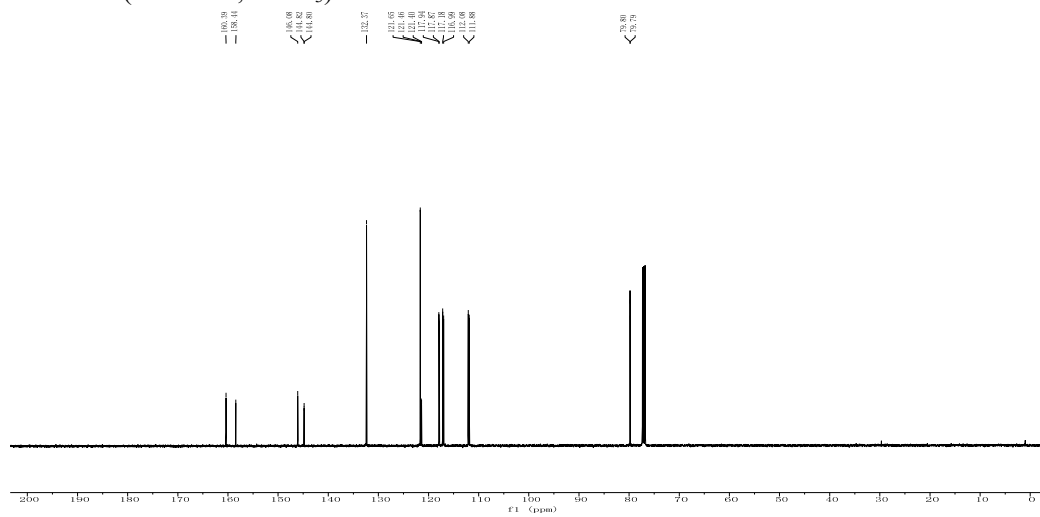

<sup>19</sup>F NMR (471 MHz, CDCl<sub>3</sub>)

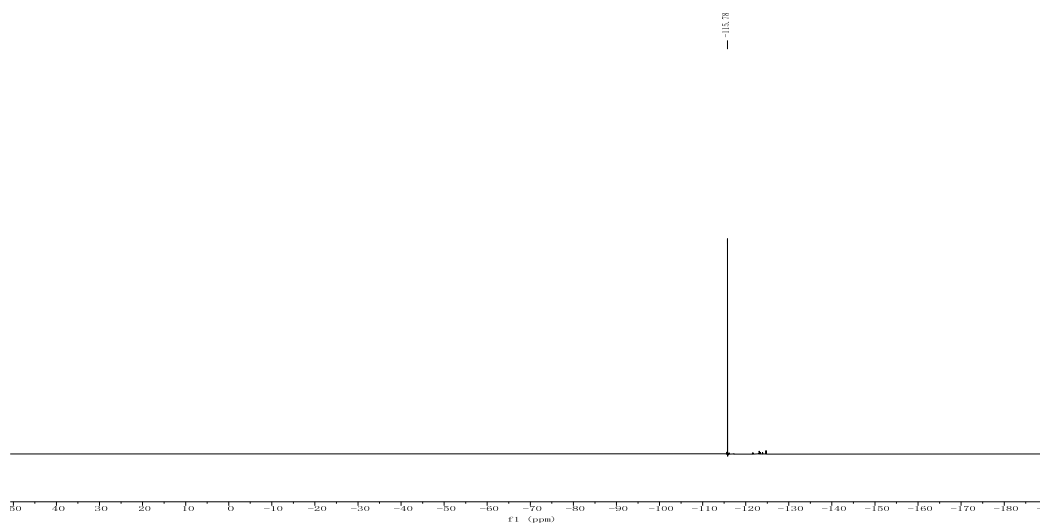

$^1\text{H}$  NMR spectrum (500 MHz,  $\text{CDCl}_3$ )

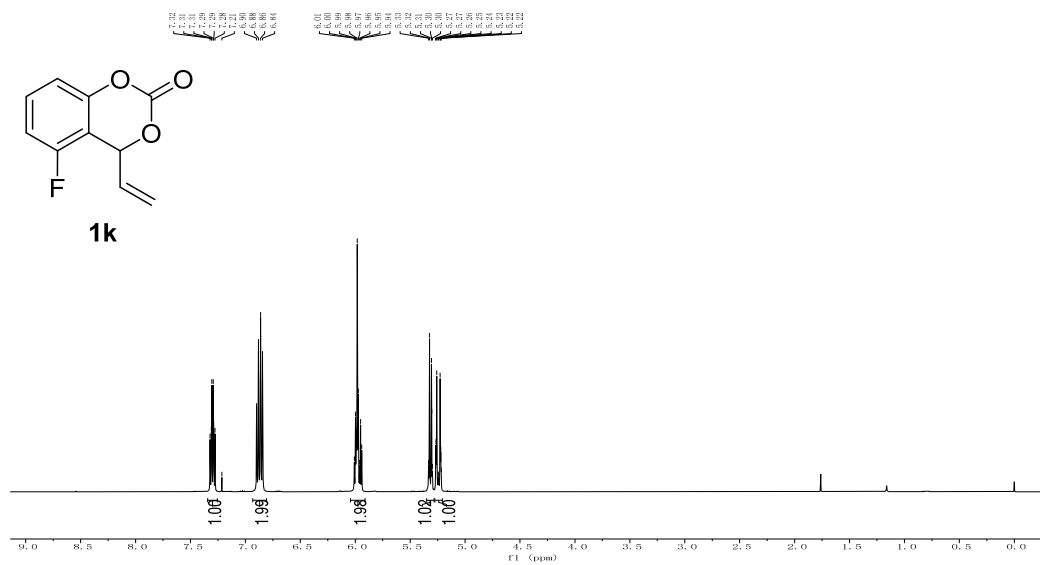

$^{13}\text{C}$  NMR (126 MHz,  $\text{CDCl}_3$ )

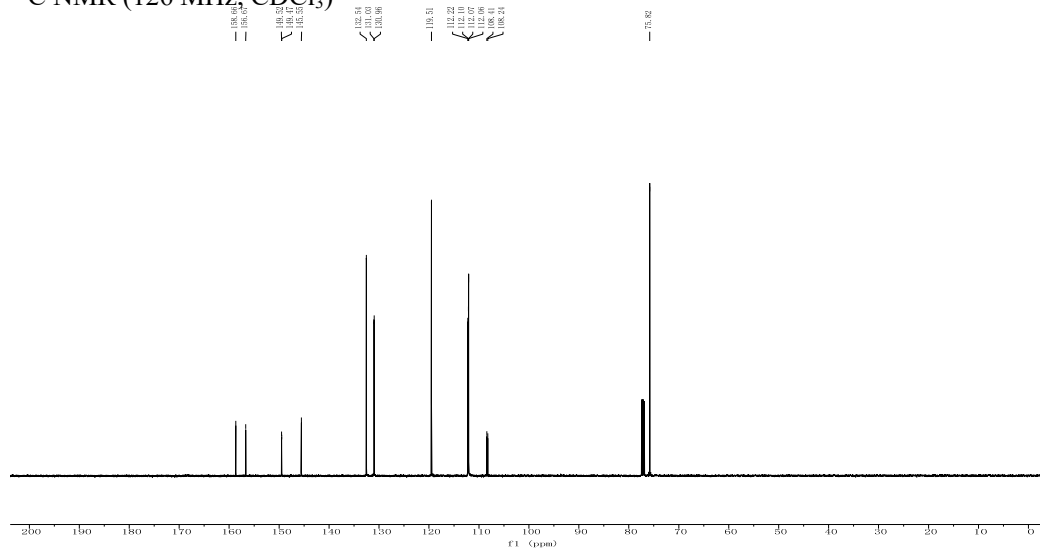

$^{19}\text{F}$  NMR (471 MHz,  $\text{CDCl}_3$ )

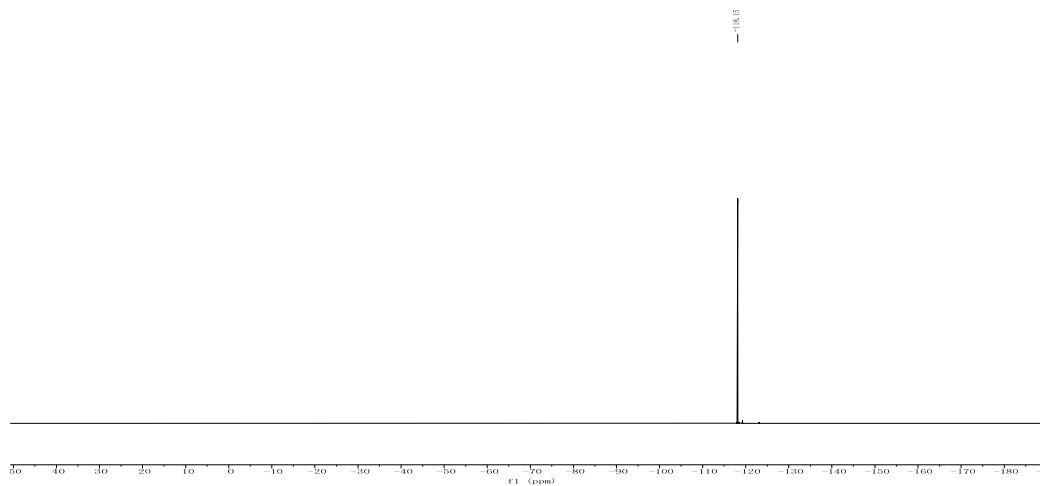



<sup>1</sup>H NMR spectrum (500 MHz, CDCl<sub>3</sub>)

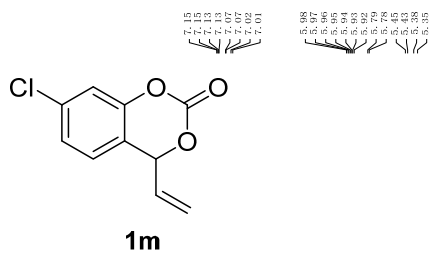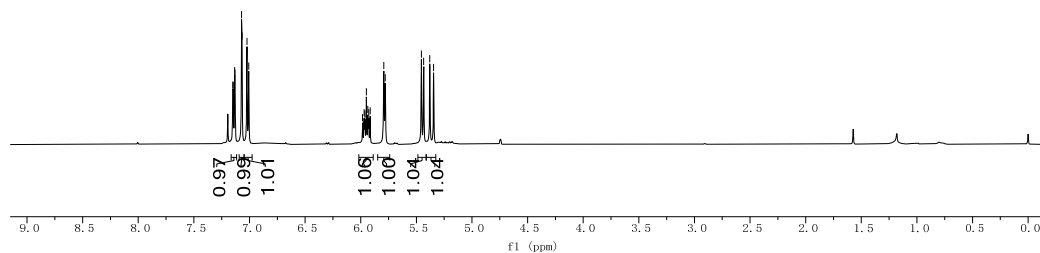

<sup>13</sup>C NMR (126 MHz, CDCl<sub>3</sub>)

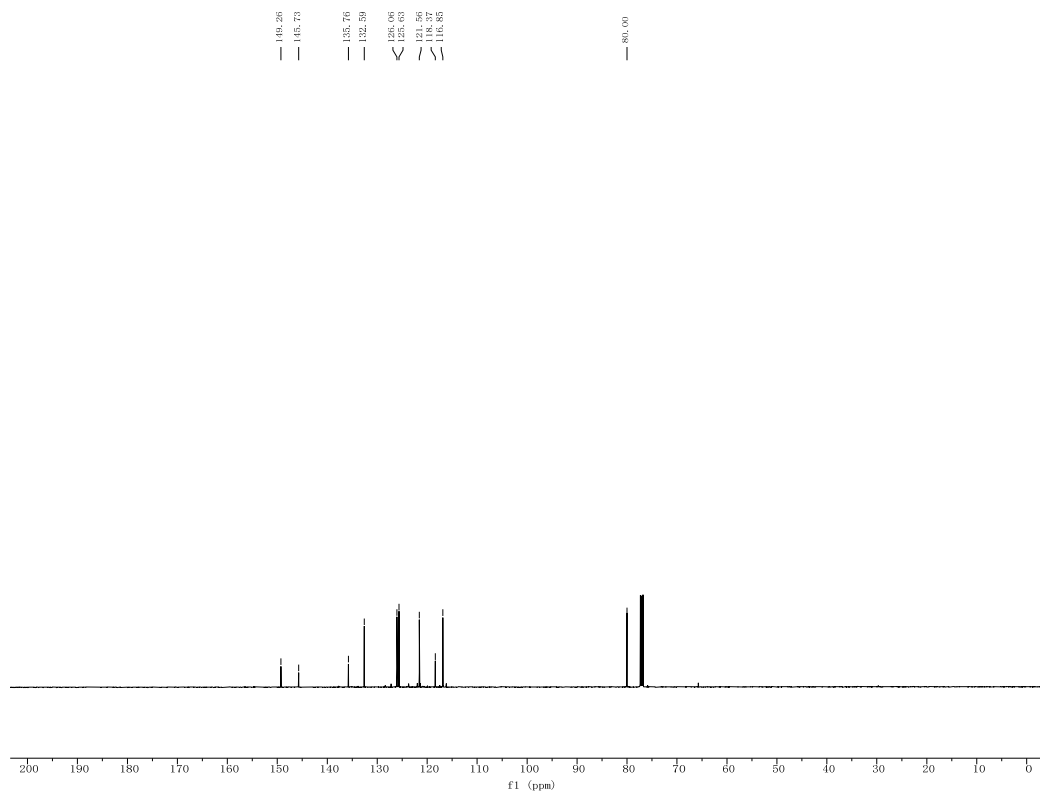

<sup>1</sup>H NMR spectrum (500 MHz, CDCl<sub>3</sub>)

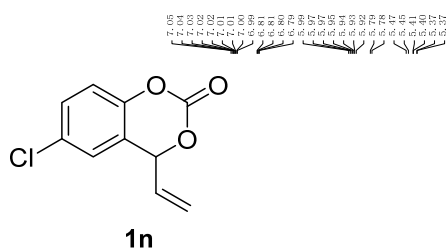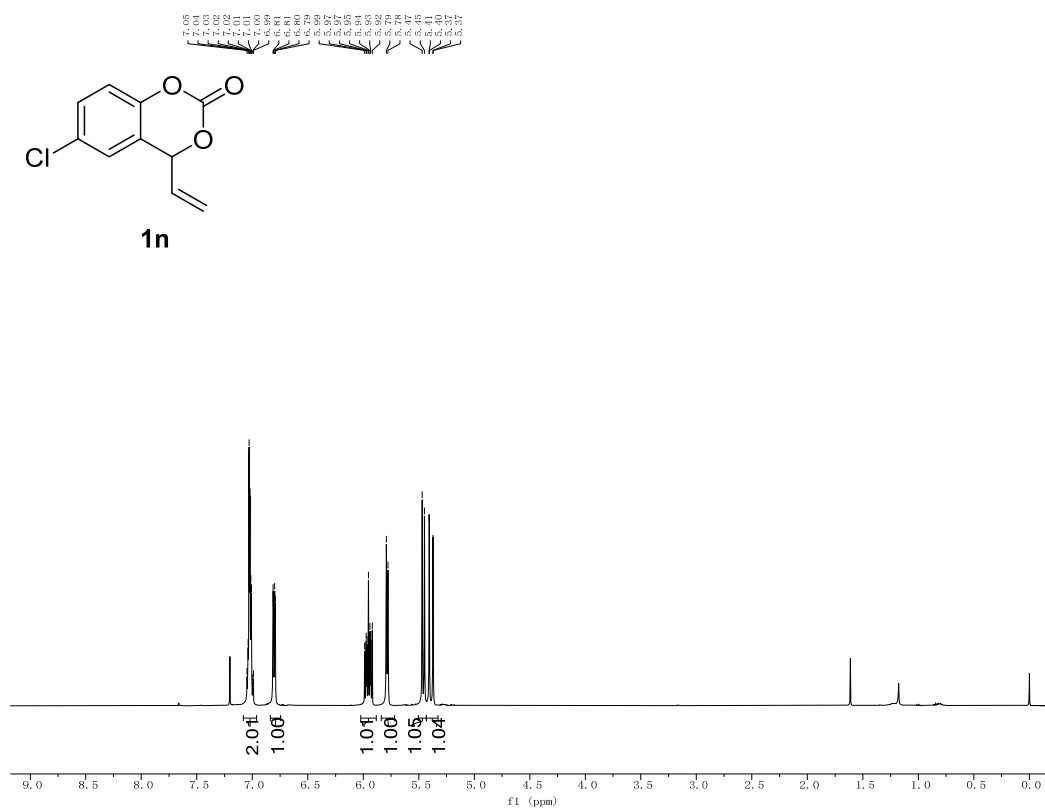

<sup>13</sup>C NMR (126 MHz, CDCl<sub>3</sub>)

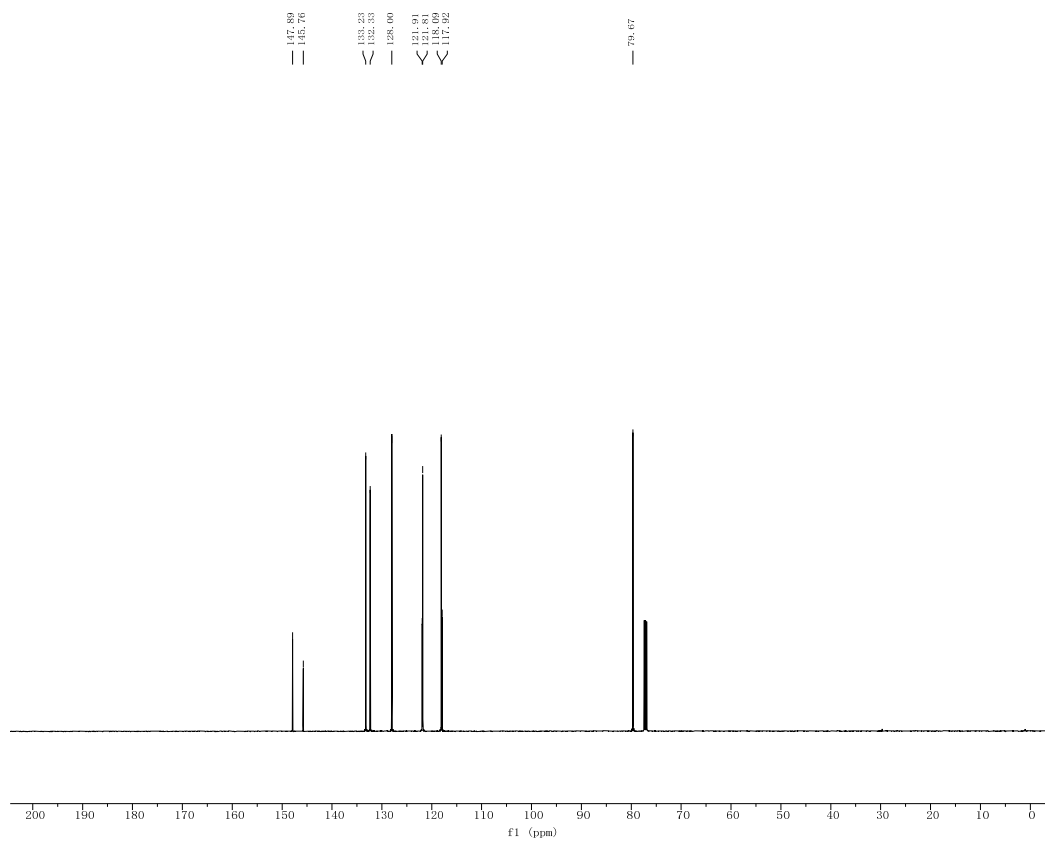

<sup>1</sup>H NMR spectrum (500 MHz, CDCl<sub>3</sub>)

7.57, 7.54, 7.53, 7.52, 7.51, 7.50, 7.49, 7.48, 7.47, 7.46, 7.45, 7.44, 7.43, 7.42, 7.41, 7.40, 7.39, 7.38, 7.37, 7.36, 7.35, 7.34, 7.33, 7.32, 7.31, 7.30, 7.29, 7.28, 7.27, 7.26, 7.25, 7.24, 7.23, 7.22, 7.21, 7.20, 7.19, 7.18, 7.17, 7.16, 7.15, 7.14, 7.13, 7.12, 7.11, 7.10, 7.09, 7.08, 7.07, 7.06, 7.05, 7.04, 7.03, 7.02, 7.01, 7.00, 6.99, 6.98, 6.97, 6.96, 6.95, 6.94, 6.93, 6.92, 6.91, 6.90, 6.89, 6.88, 6.87, 6.86, 6.85, 6.84, 6.83, 6.82, 6.81, 6.80, 6.79, 6.78, 6.77, 6.76, 6.75, 6.74, 6.73, 6.72, 6.71, 6.70, 6.69, 6.68, 6.67, 6.66, 6.65, 6.64, 6.63, 6.62, 6.61, 6.60, 6.59, 6.58, 6.57, 6.56, 6.55

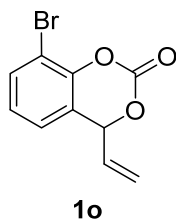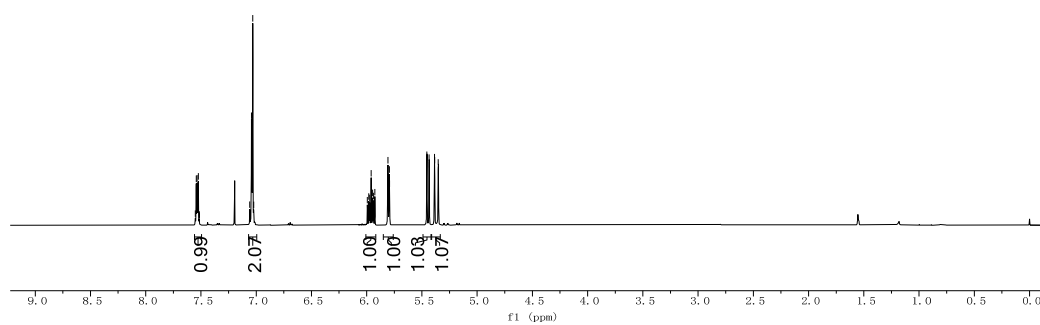

<sup>13</sup>C NMR (126 MHz, CDCl<sub>3</sub>)

146.57, 146.57, 133.05, 132.52, 126.12, 124.08, 121.51, 121.51, 110.08, 80.12

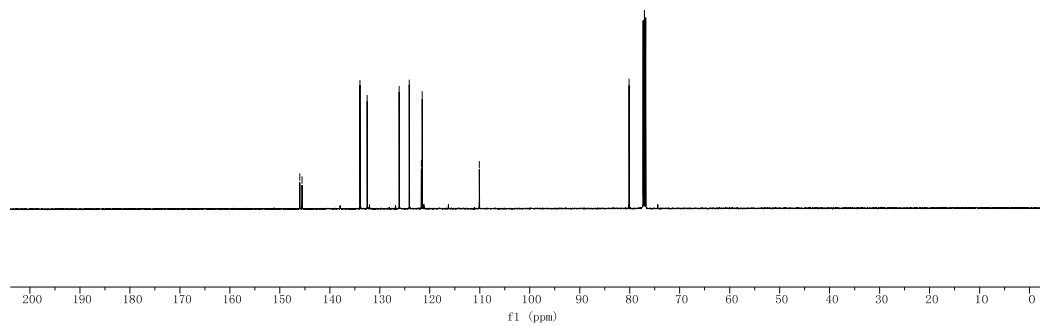



<sup>1</sup>H NMR spectrum (500 MHz, CDCl<sub>3</sub>)

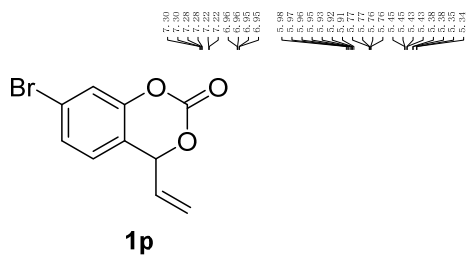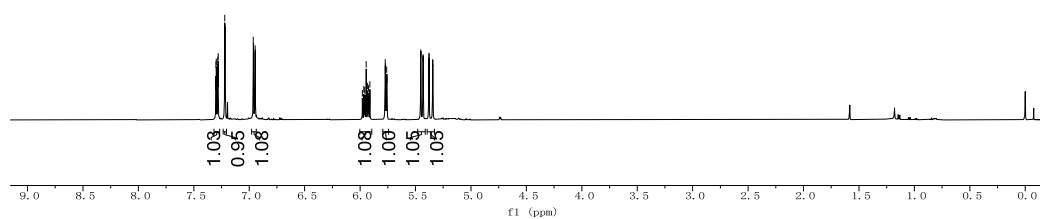

<sup>13</sup>C NMR (126 MHz, CDCl<sub>3</sub>)

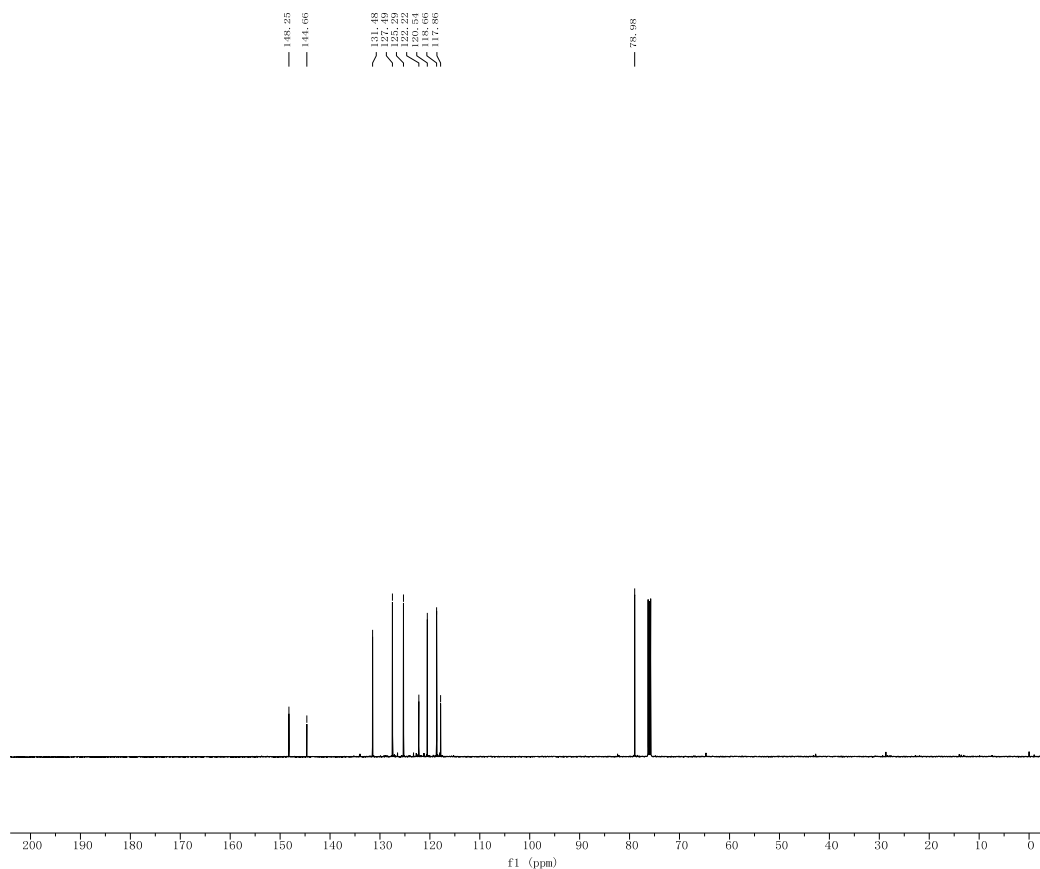

<sup>1</sup>H NMR spectrum (500 MHz, CDCl<sub>3</sub>)

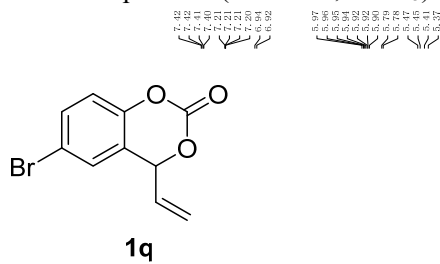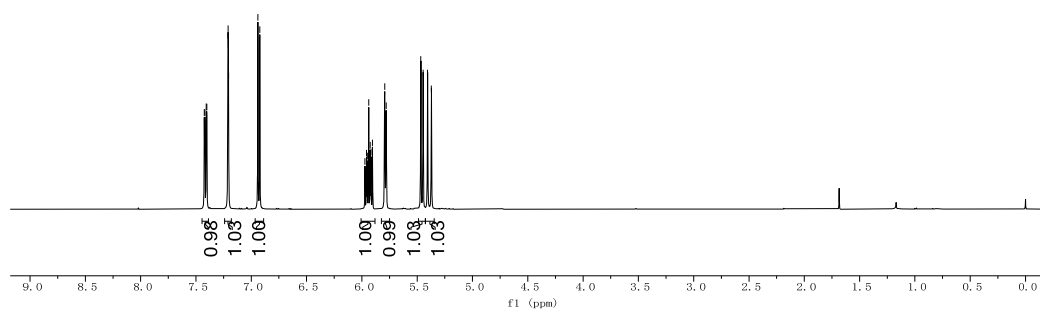

<sup>13</sup>C NMR spectrum (126 MHz, CDCl<sub>3</sub>)

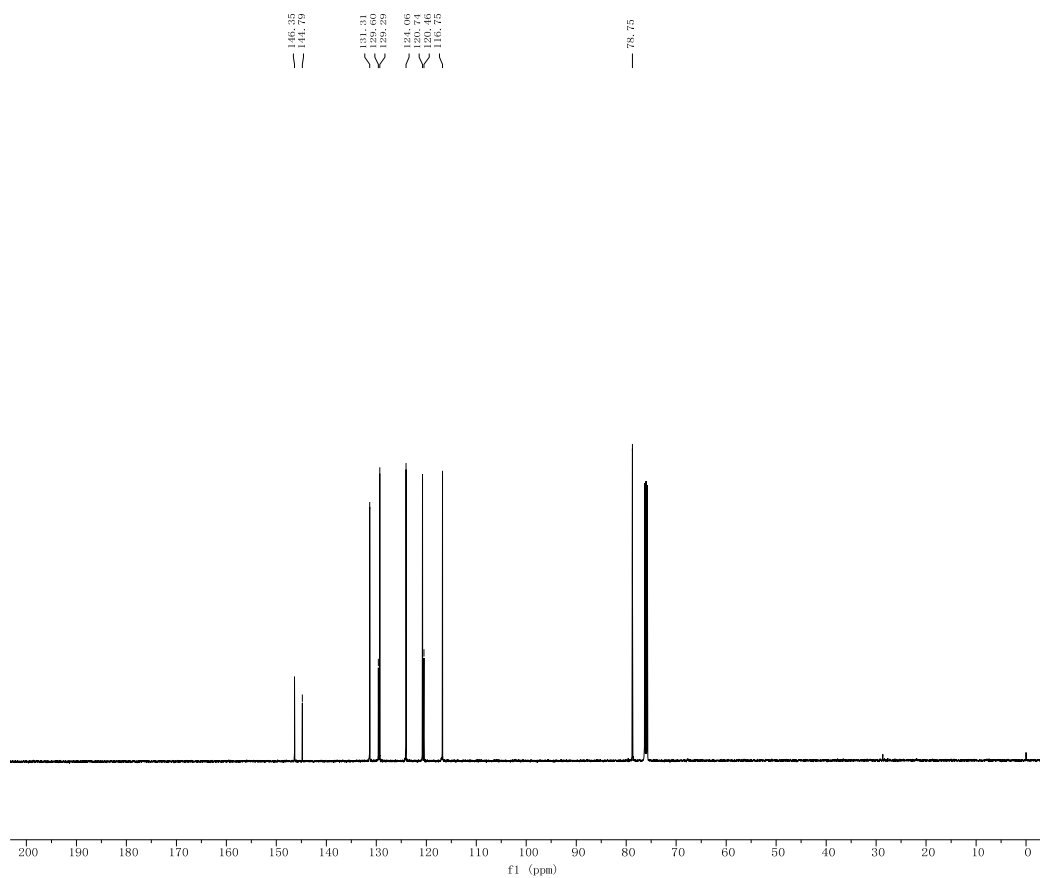



<sup>1</sup>H NMR spectrum (500 MHz, CDCl<sub>3</sub>)

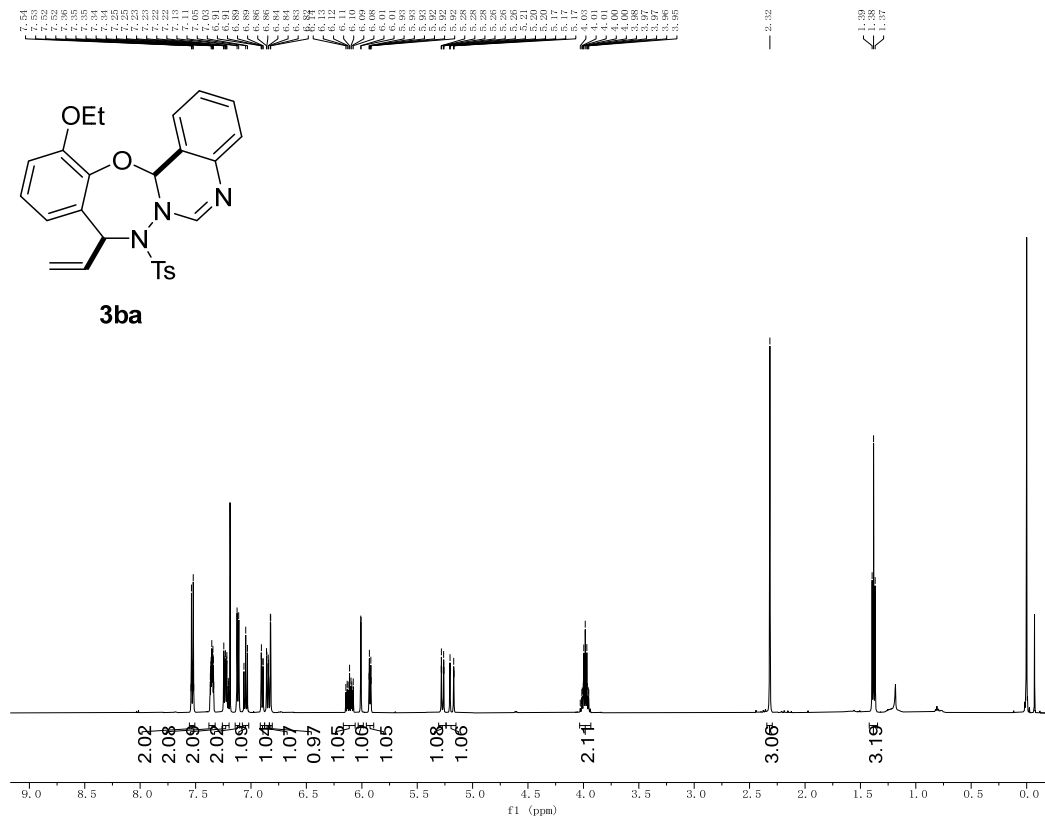

<sup>13</sup>C NMR (126 MHz, CDCl<sub>3</sub>)

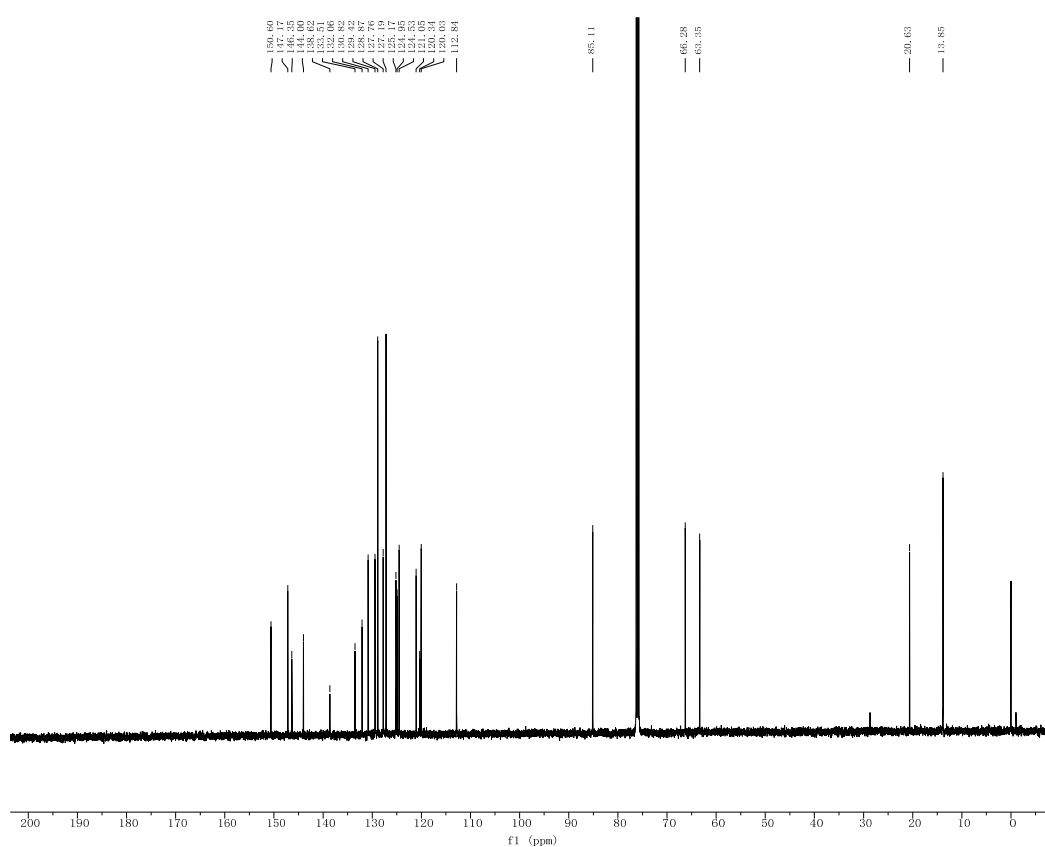

<sup>1</sup>H NMR spectrum (500 MHz, CDCl<sub>3</sub>)

7.81, 7.74, 7.65, 7.58, 7.52, 7.48, 7.44, 7.38, 7.35, 7.28, 7.25, 7.21, 7.17, 7.14, 7.08, 7.05, 7.01, 6.94, 6.88, 6.82, 6.75, 6.67, 6.62, 6.57, 6.52, 6.48, 6.41, 6.34, 6.28, 6.22, 6.16, 6.10, 6.04, 5.98, 5.92, 5.86, 5.80, 5.74, 5.68, 5.62, 5.56, 5.50, 5.44, 5.38, 5.32, 5.26, 5.20, 5.14, 5.08, 5.02, 4.96, 4.90, 4.84, 4.78, 4.72, 4.66, 4.60, 4.54, 4.48, 4.42, 4.36, 4.30, 4.24, 4.18, 4.12, 4.06, 4.00, 3.94, 3.88, 3.82, 3.76, 3.70, 3.64, 3.58, 3.52, 3.46, 3.40, 3.34, 3.28, 3.22, 3.16, 3.10, 3.04, 2.98, 2.92, 2.86, 2.80, 2.74, 2.68, 2.62, 2.56, 2.50, 2.44, 2.38, 2.32, 2.26, 2.20, 2.14, 2.08, 2.02, 2.00, 1.94, 1.88, 1.82, 1.76, 1.70, 1.64, 1.58, 1.52, 1.46, 1.40, 1.34, 1.28, 1.22, 1.16, 1.10, 1.04, 1.00, 0.94, 0.88, 0.82, 0.76, 0.70, 0.64, 0.58, 0.52, 0.46, 0.40, 0.34, 0.28, 0.22, 0.16, 0.10, 0.04, 0.00

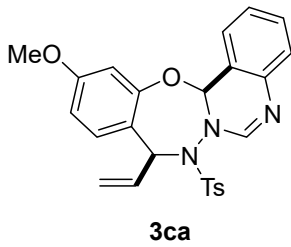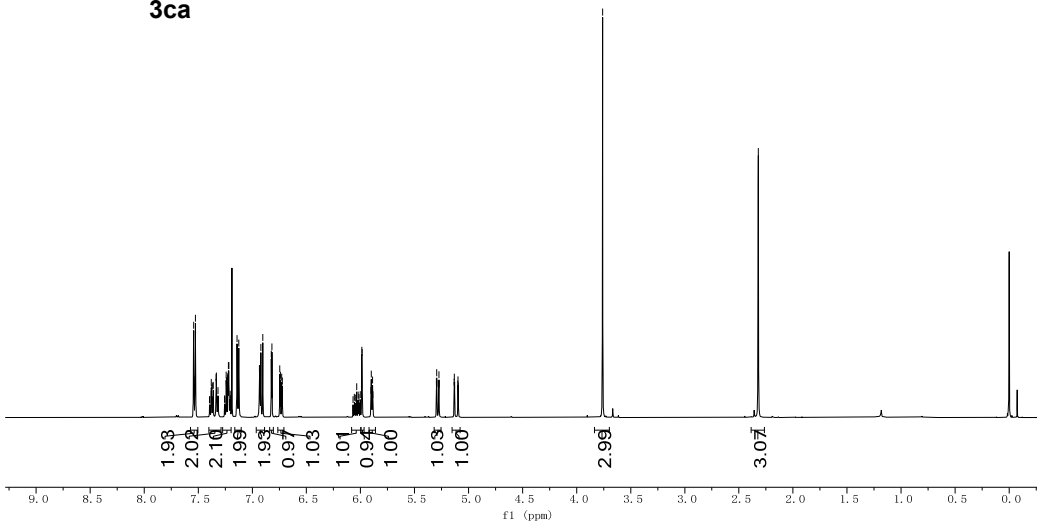

<sup>13</sup>C NMR (126 MHz, CDCl<sub>3</sub>)

155.68, 150.53, 149.57, 144.30, 137.45, 133.35, 130.87, 129.64, 128.29, 127.14, 126.44, 121.91, 120.18, 113.74, 85.26, 66.12, 54.74, 20.66

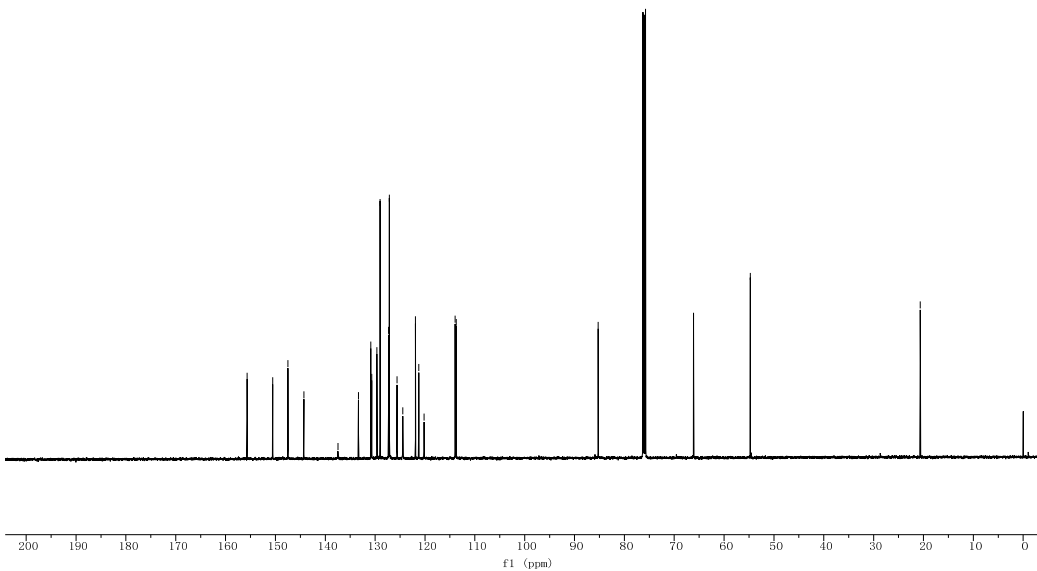

<sup>1</sup>H NMR spectrum (500 MHz, CDCl<sub>3</sub>)

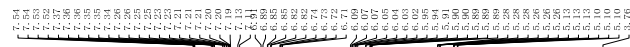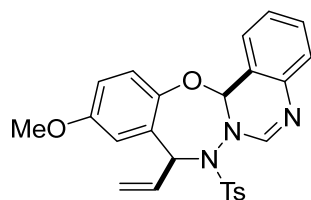

**3da**, 10:1 dr

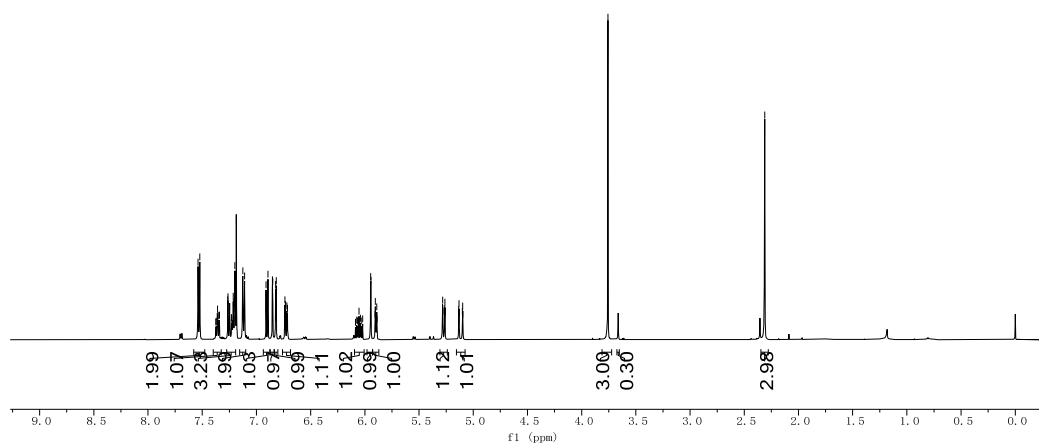

<sup>13</sup>C NMR (126 MHz, CDCl<sub>3</sub>)

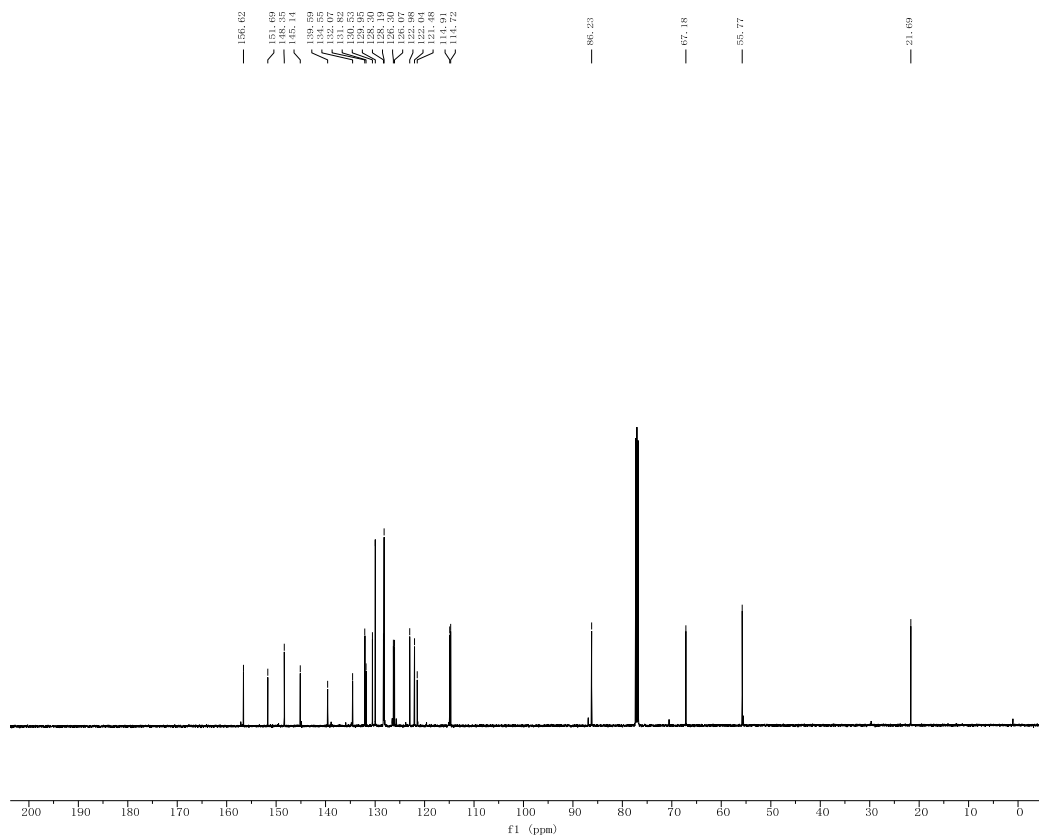

$^1\text{H}$  NMR spectrum (500 MHz,  $\text{CDCl}_3$ )

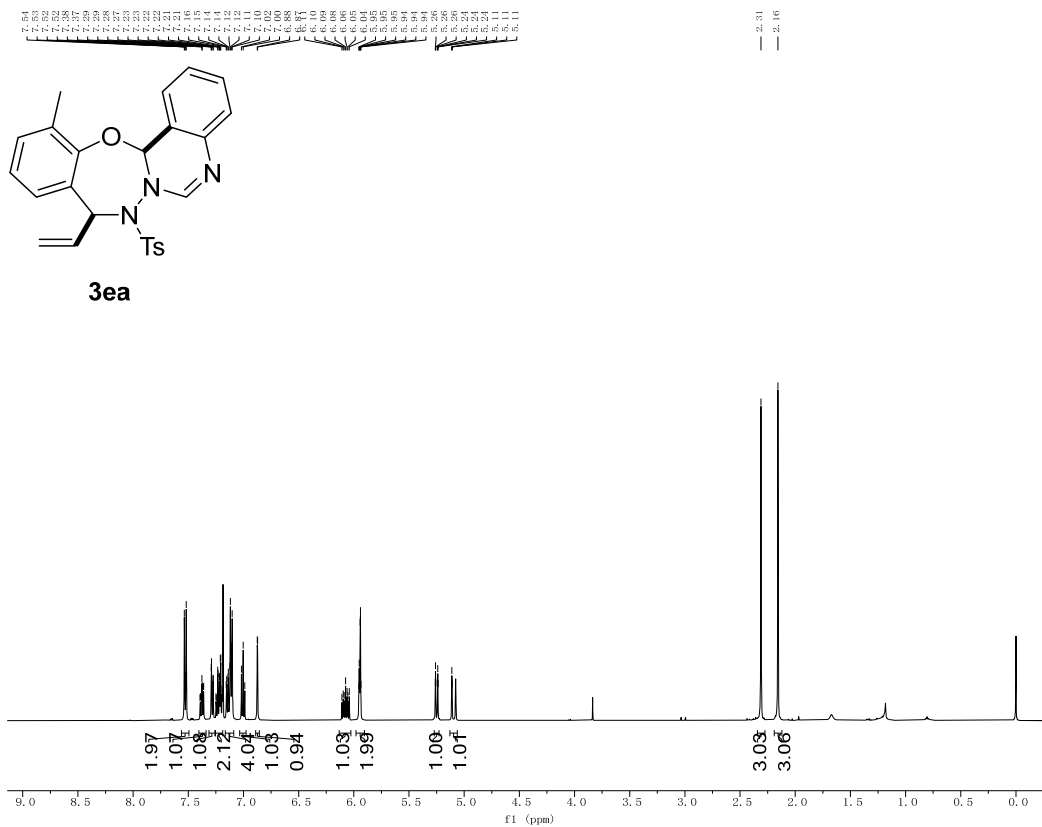

$^{13}\text{C}$  NMR (126 MHz,  $\text{CDCl}_3$ )

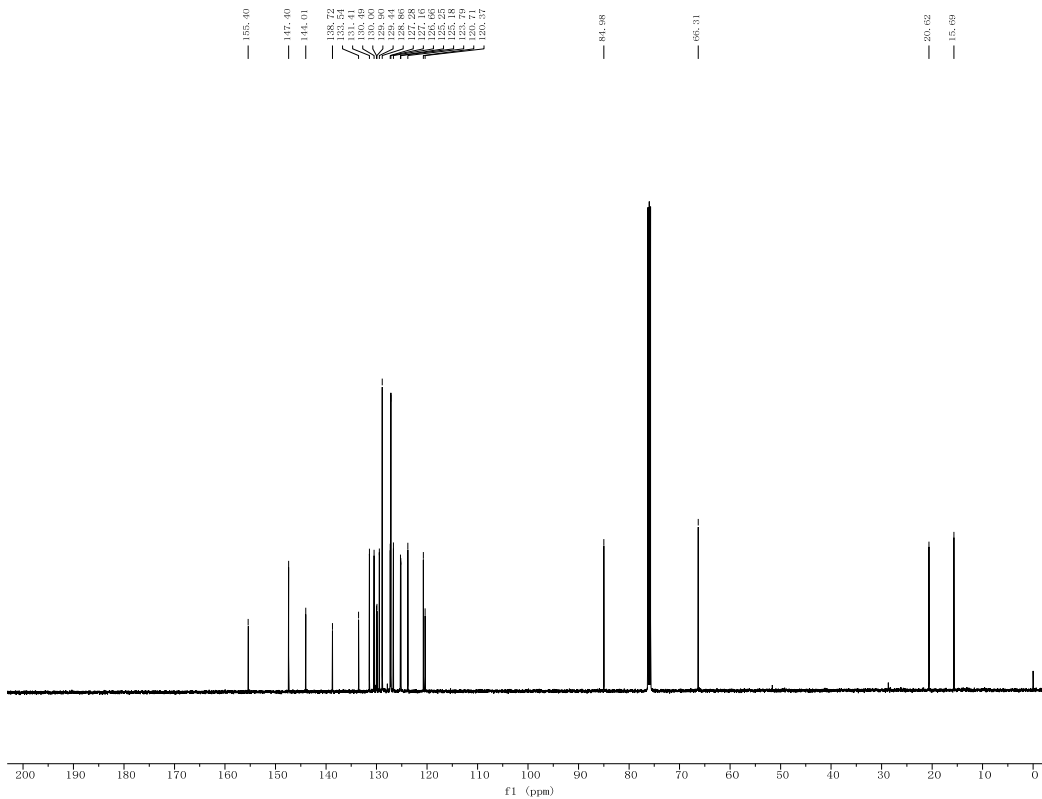

<sup>1</sup>H NMR spectrum (500 MHz, CDCl<sub>3</sub>)

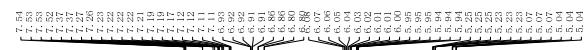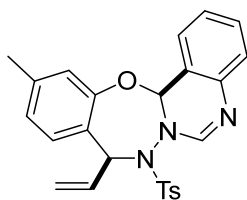

**3fa**

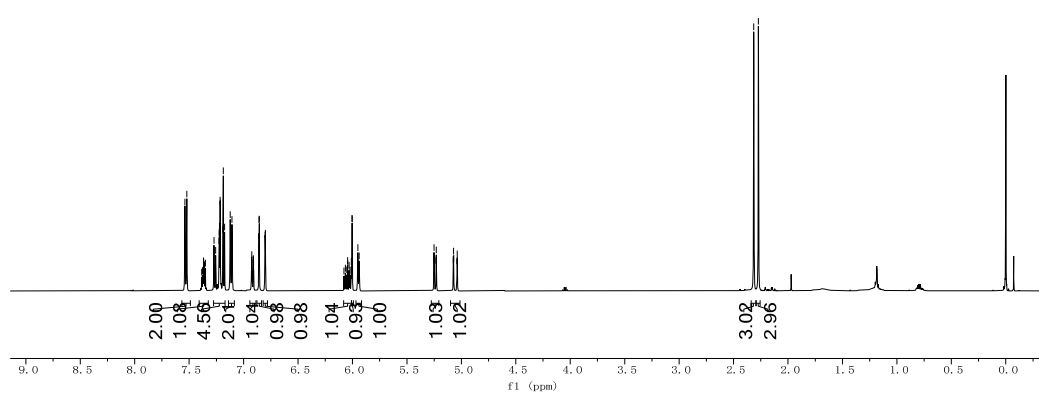

<sup>13</sup>C NMR (126 MHz, CDCl<sub>3</sub>)

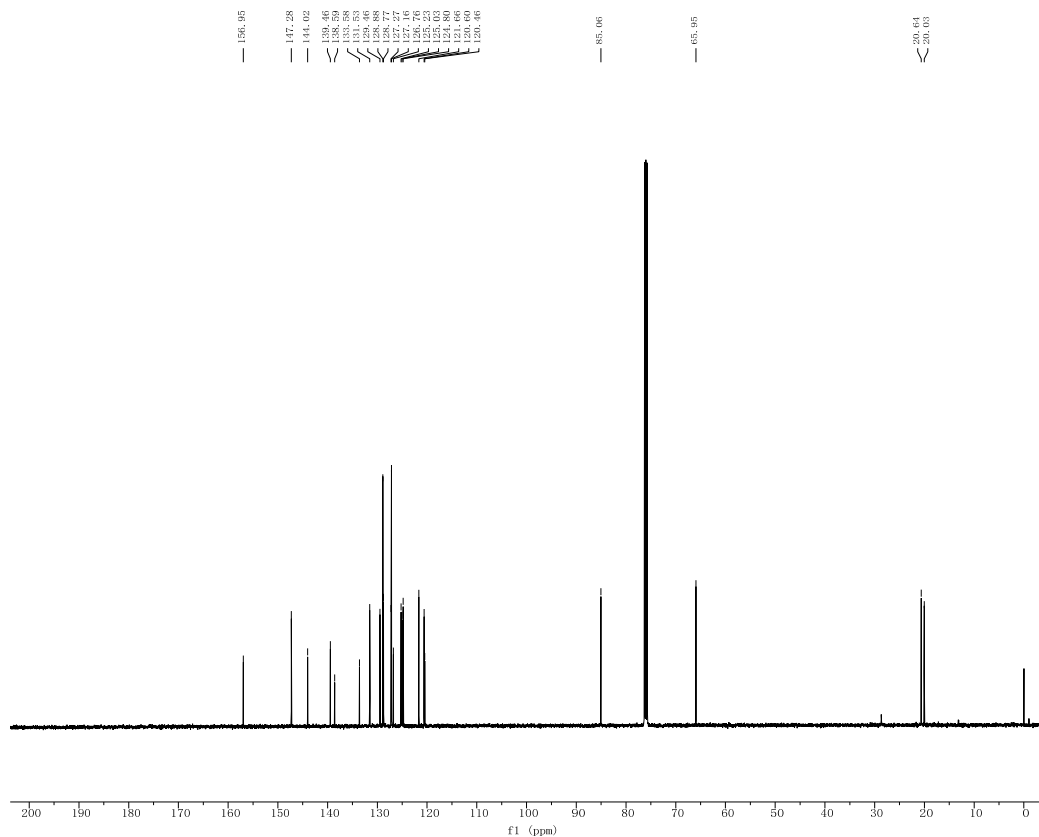



<sup>1</sup>H NMR spectrum (500 MHz, CDCl<sub>3</sub>)

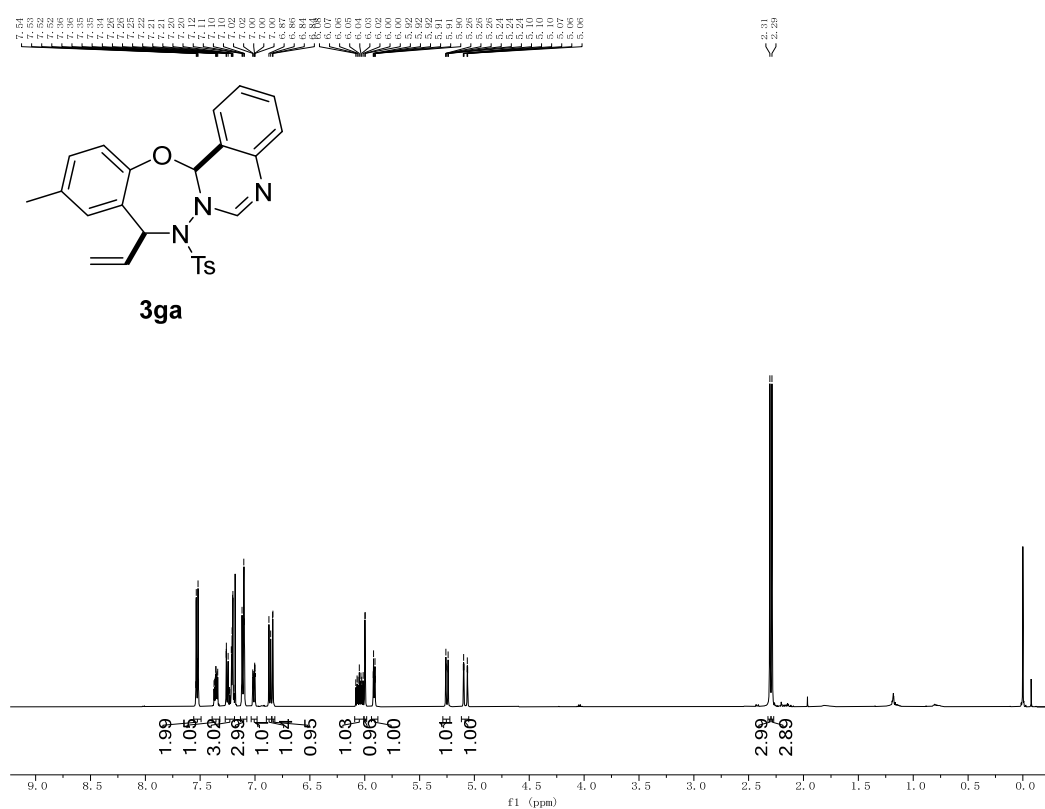

<sup>13</sup>C NMR (126 MHz, CDCl<sub>3</sub>)

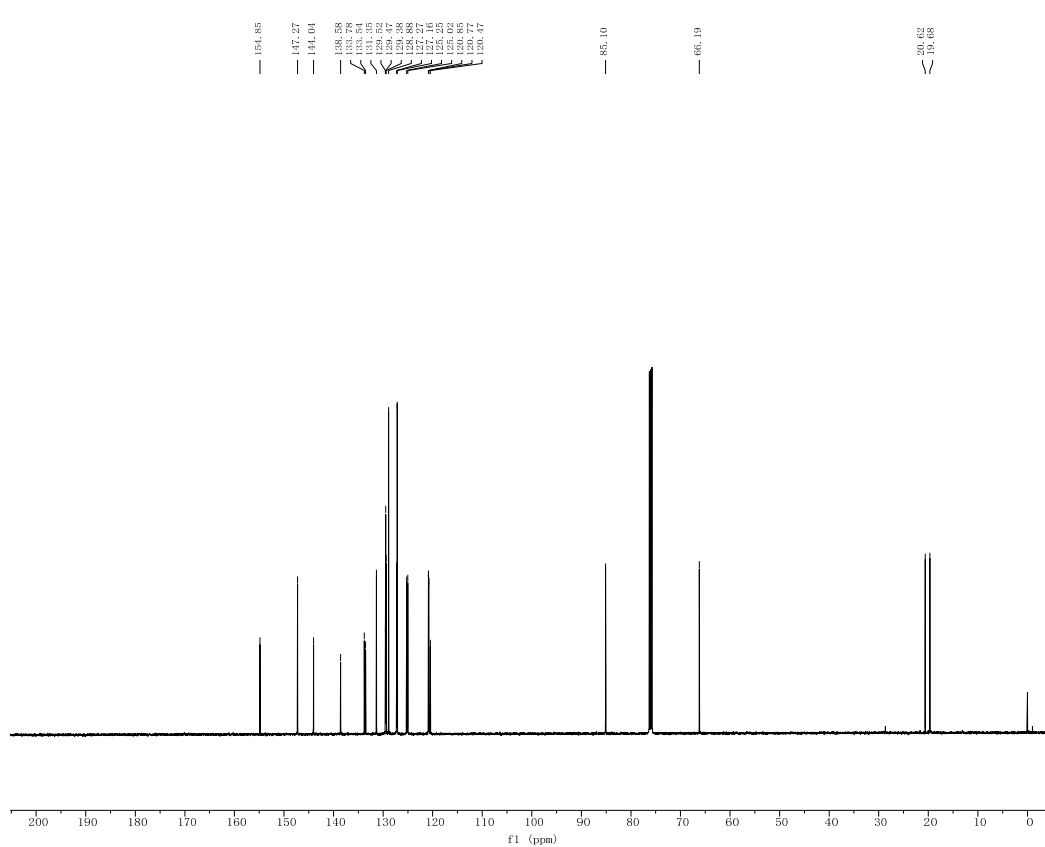

<sup>1</sup>H NMR spectrum (500 MHz, CDCl<sub>3</sub>)

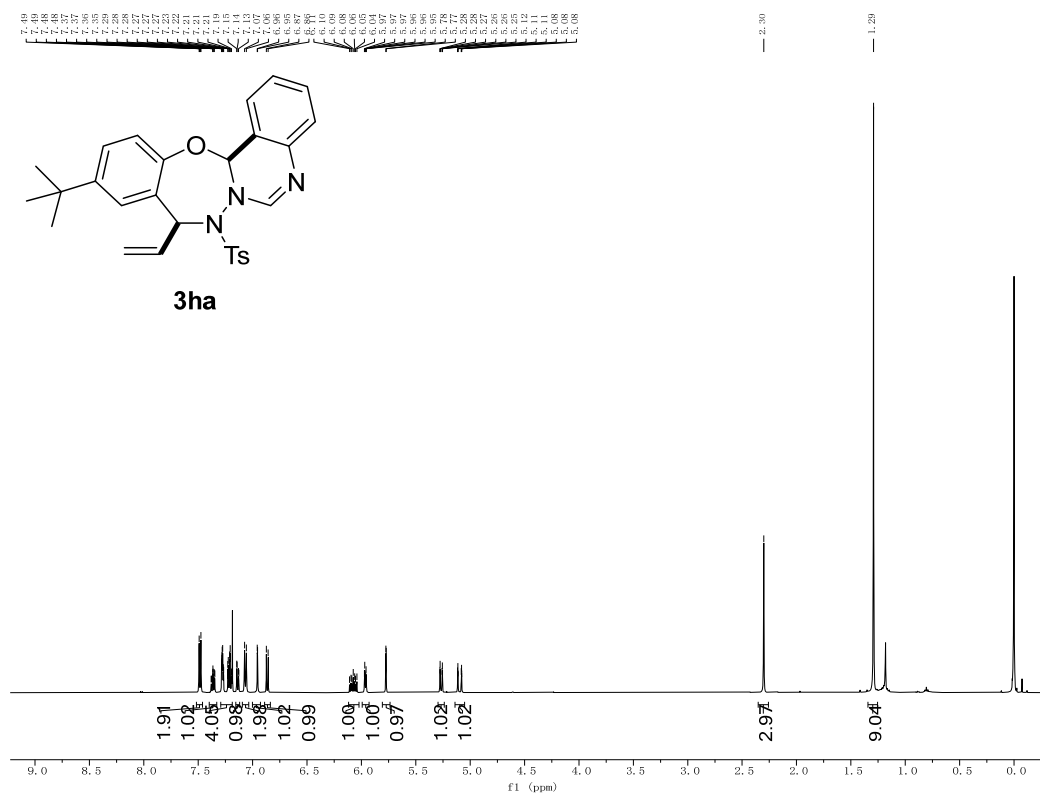

<sup>13</sup>C NMR (126 MHz, CDCl<sub>3</sub>)

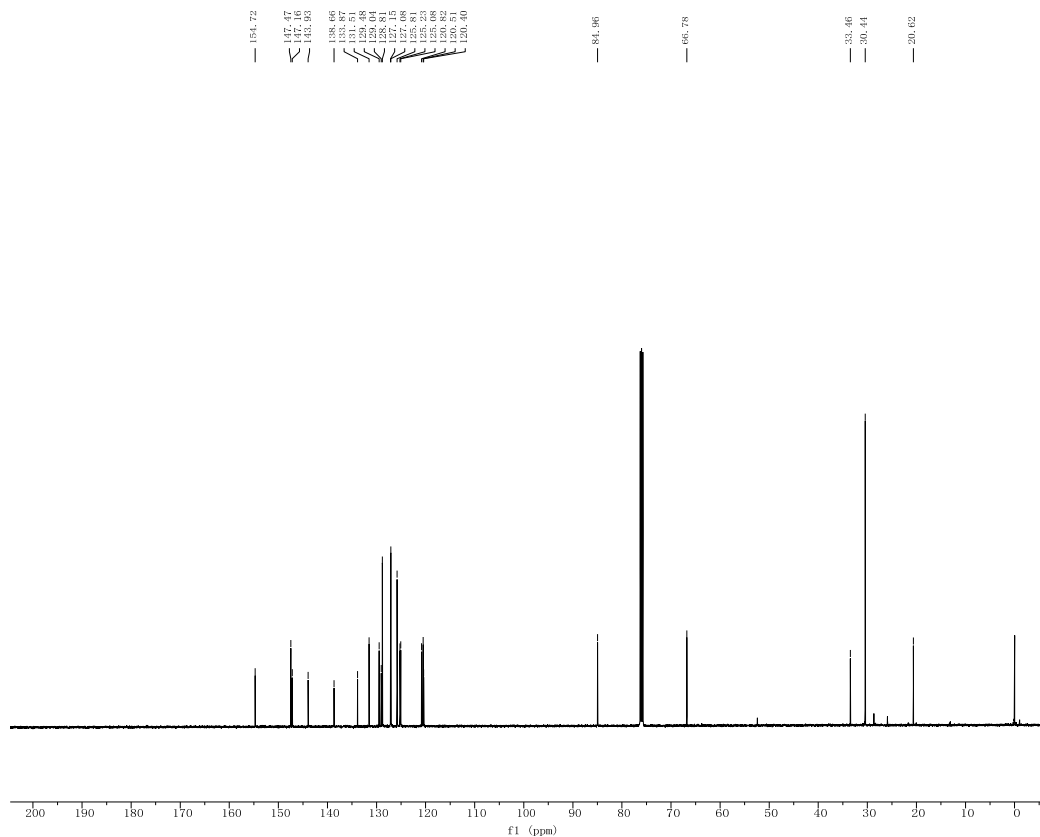

<sup>1</sup>H NMR spectrum (500 MHz, CDCl<sub>3</sub>)

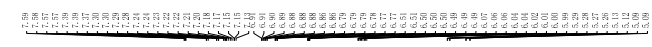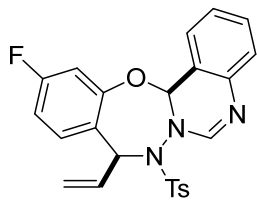

**3ia**

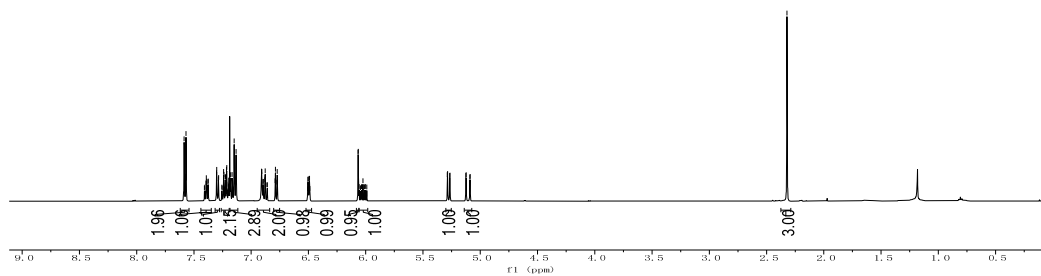

<sup>13</sup>C NMR (126 MHz, CDCl<sub>3</sub>)

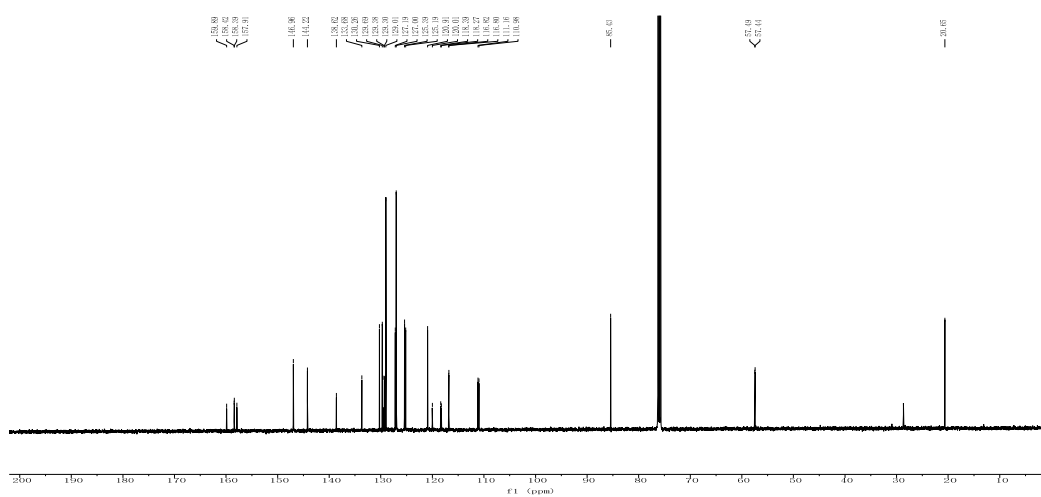

<sup>19</sup>F NMR (471 MHz, CDCl<sub>3</sub>)

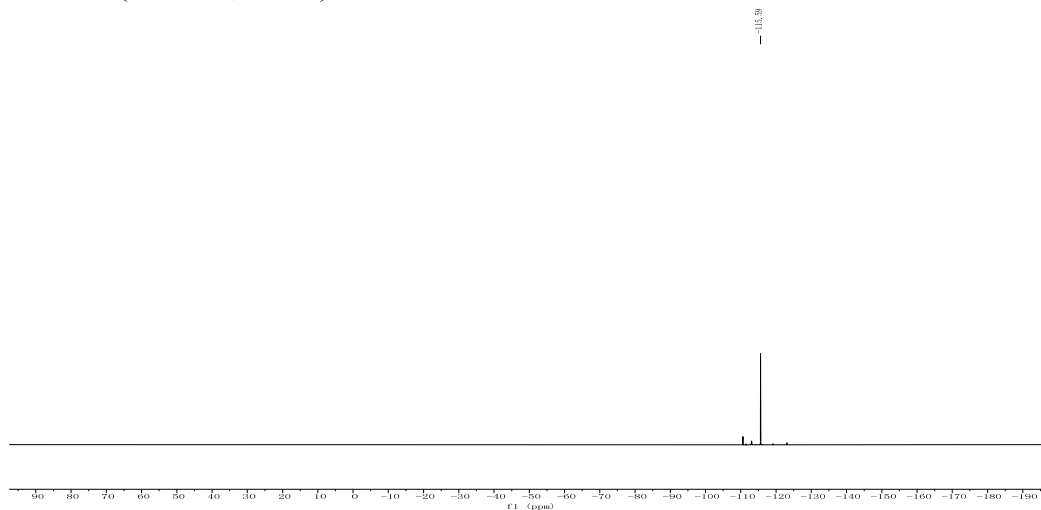

<sup>1</sup>H NMR spectrum (500 MHz, CDCl<sub>3</sub>)

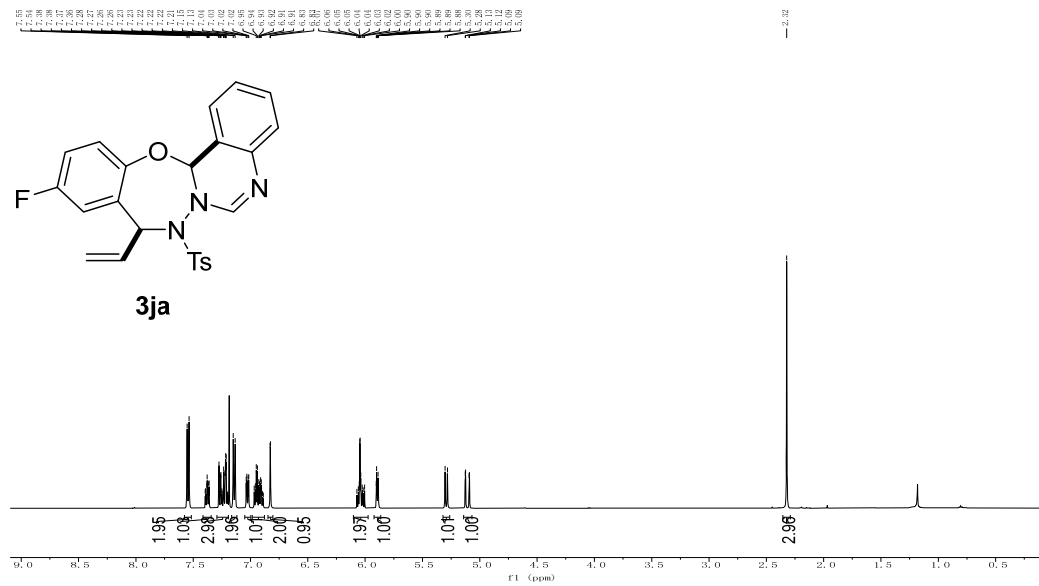

<sup>13</sup>C NMR (126 MHz, CDCl<sub>3</sub>)

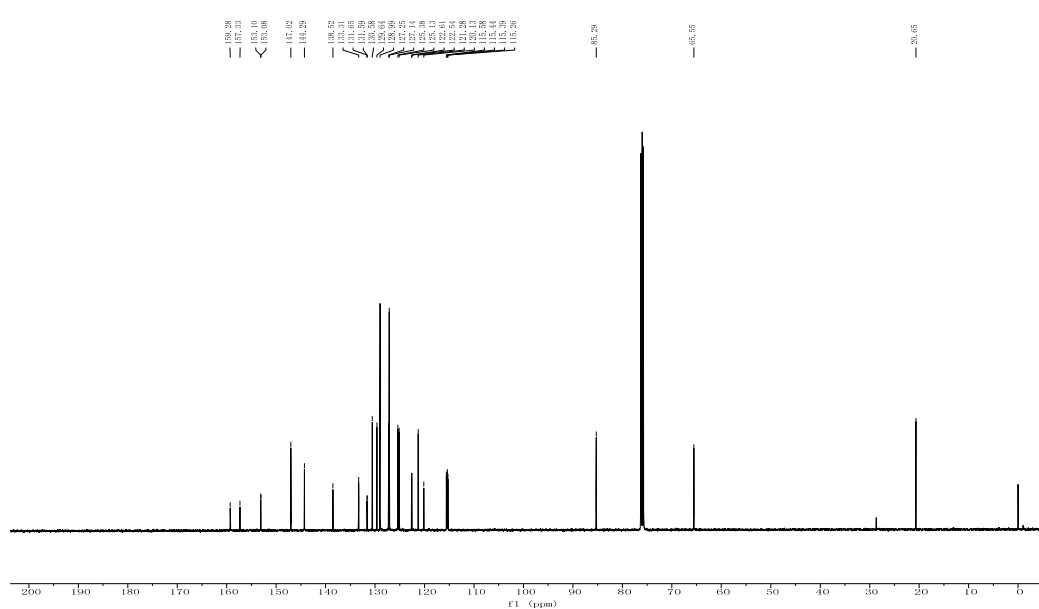

<sup>19</sup>F NMR (471 MHz, CDCl<sub>3</sub>)

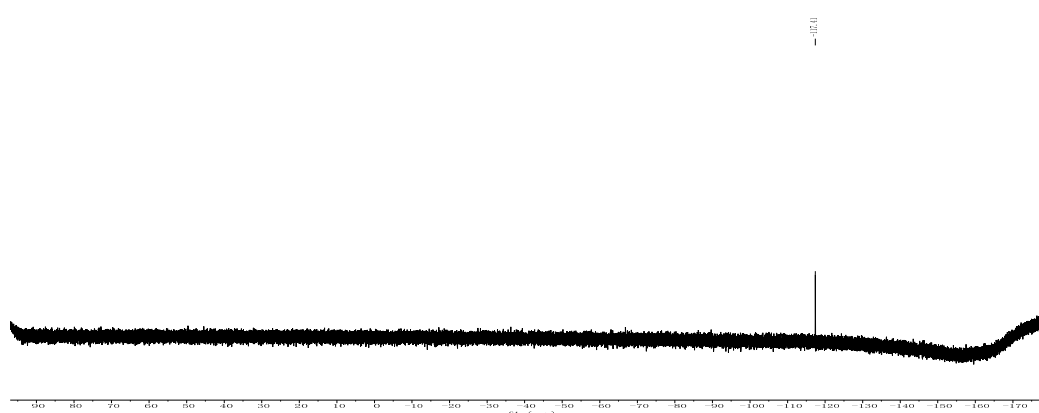

<sup>1</sup>H NMR spectrum (500 MHz, CDCl<sub>3</sub>)

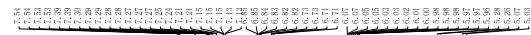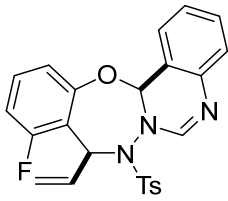

**3ka**

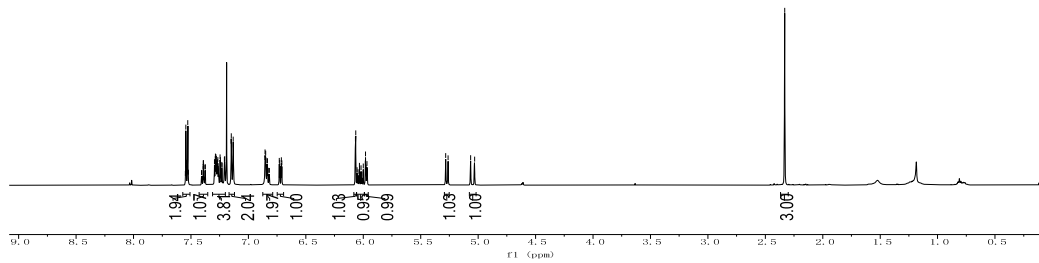

<sup>13</sup>C NMR (126 MHz, CDCl<sub>3</sub>)

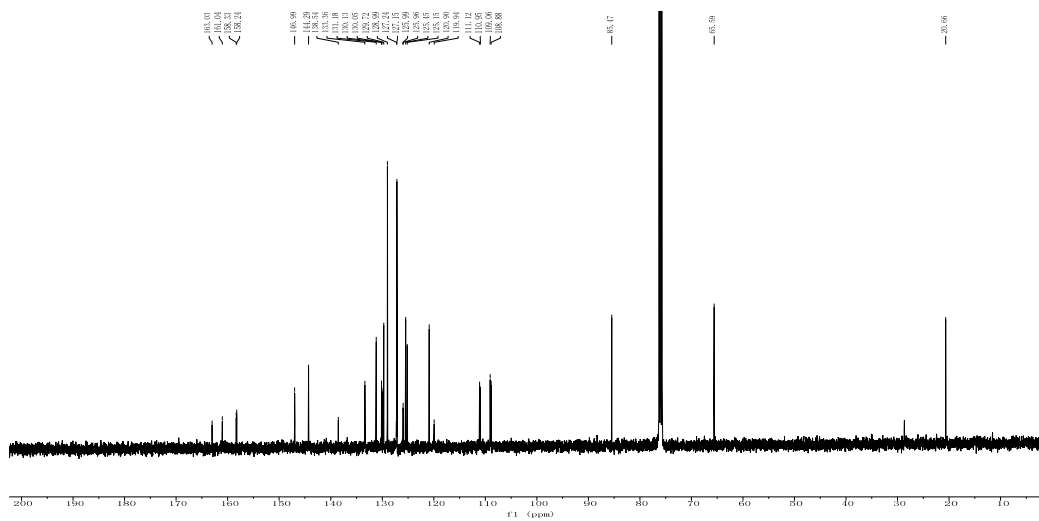

<sup>19</sup>F NMR (471 MHz, CDCl<sub>3</sub>)

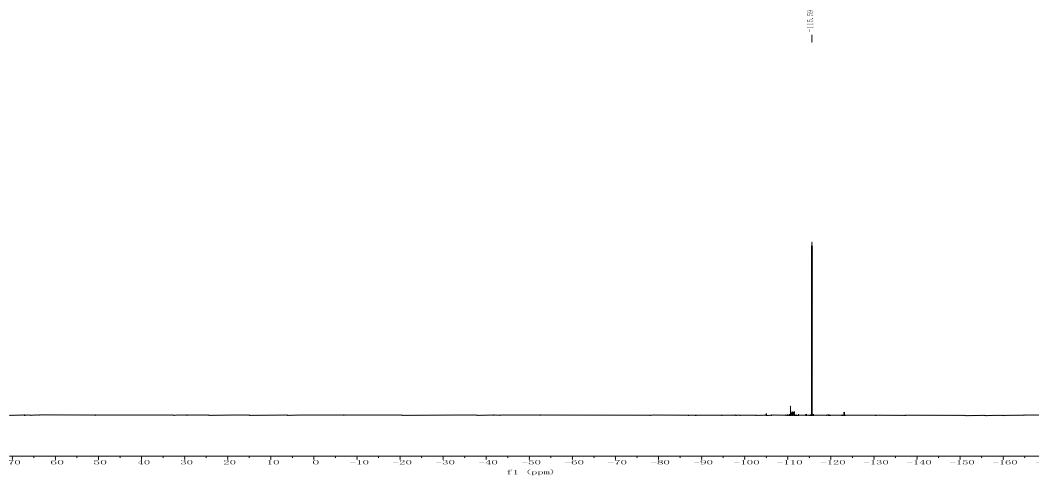

<sup>1</sup>H NMR spectrum (500 MHz, CDCl<sub>3</sub>)

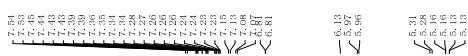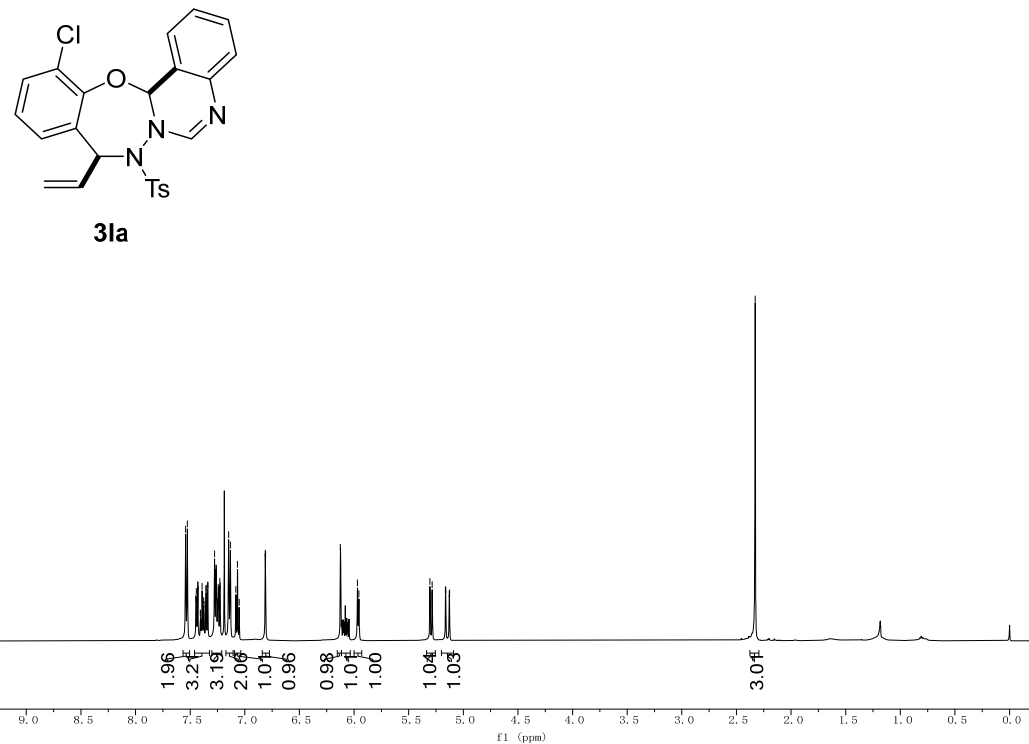

<sup>13</sup>C NMR (126 MHz, CDCl<sub>3</sub>)

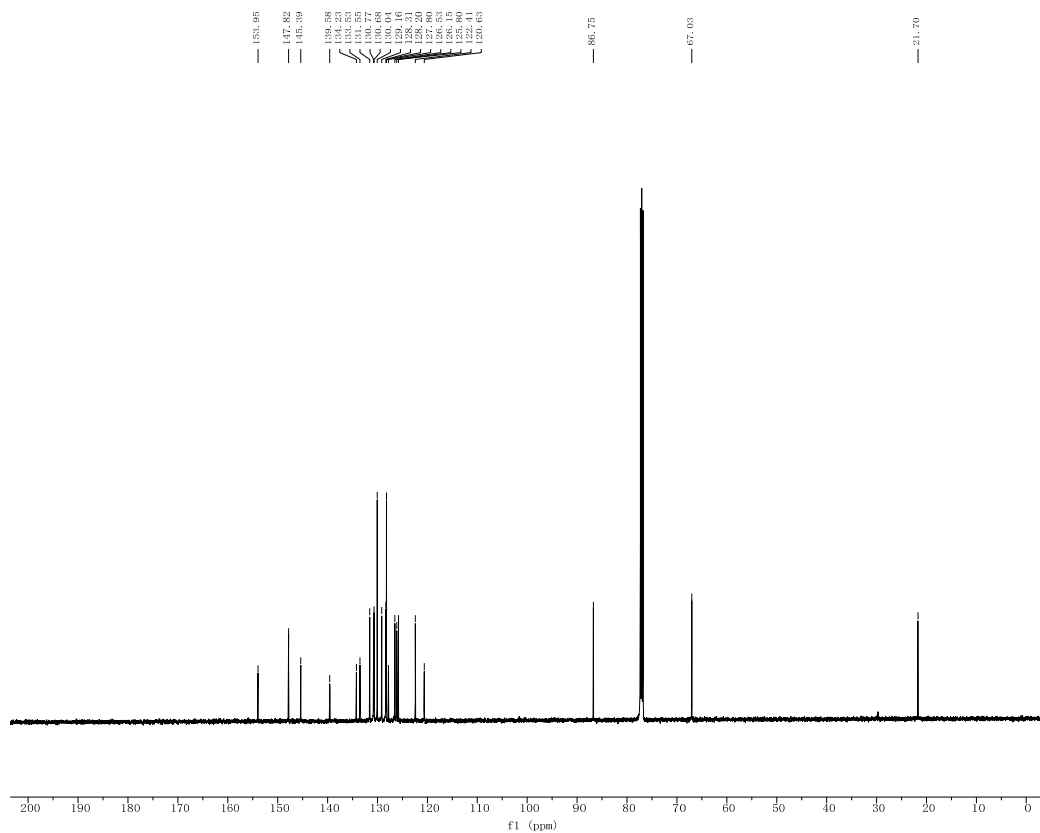

<sup>1</sup>H NMR spectrum (500 MHz, CDCl<sub>3</sub>)

7.558, 7.544, 7.530, 7.516, 7.490, 7.476, 7.460, 7.446, 7.429, 7.415, 7.397, 7.383, 7.367, 7.353, 7.335, 7.321, 7.304, 7.288, 7.272, 7.255, 7.239, 7.224, 7.208, 7.192, 7.176, 7.160, 7.144, 7.128, 7.112, 7.096, 7.080, 7.064, 7.048, 7.032, 7.016, 6.999, 6.983, 6.967, 6.951, 6.935, 6.919, 6.903, 6.887, 6.871, 6.855, 6.839, 6.823, 6.807, 6.791, 6.775, 6.759, 6.743, 6.727, 6.711, 6.695, 6.679, 6.663, 6.647, 6.631, 6.615, 6.599, 6.583, 6.567, 6.551, 6.535, 6.519, 6.503, 6.487, 6.471, 6.455, 6.439, 6.423, 6.407, 6.391, 6.375, 6.359, 6.343, 6.327, 6.311, 6.295, 6.279, 6.263, 6.247, 6.231, 6.215, 6.199, 6.183, 6.167, 6.151, 6.135, 6.119, 6.103, 6.087, 6.071, 6.055, 6.039, 6.023, 6.007, 5.991, 5.975, 5.959, 5.943, 5.927, 5.911, 5.895, 5.879, 5.863, 5.847, 5.831, 5.815, 5.799, 5.783, 5.767, 5.751, 5.735, 5.719, 5.703, 5.687, 5.671, 5.655, 5.639, 5.623, 5.607, 5.591, 5.575, 5.559, 5.543, 5.527, 5.511, 5.495, 5.479, 5.463, 5.447, 5.431, 5.415, 5.399, 5.383, 5.367, 5.351, 5.335, 5.319, 5.303, 5.287, 5.271, 5.255, 5.239, 5.223, 5.207, 5.191, 5.175, 5.159, 5.143, 5.127, 5.111, 5.095, 5.079, 5.063, 5.047, 5.031, 5.015, 4.999, 4.983, 4.967, 4.951, 4.935, 4.919, 4.903, 4.887, 4.871, 4.855, 4.839, 4.823, 4.807, 4.791, 4.775, 4.759, 4.743, 4.727, 4.711, 4.695, 4.679, 4.663, 4.647, 4.631, 4.615, 4.599, 4.583, 4.567, 4.551, 4.535, 4.519, 4.503, 4.487, 4.471, 4.455, 4.439, 4.423, 4.407, 4.391, 4.375, 4.359, 4.343, 4.327, 4.311, 4.295, 4.279, 4.263, 4.247, 4.231, 4.215, 4.199, 4.183, 4.167, 4.151, 4.135, 4.119, 4.103, 4.087, 4.071, 4.055, 4.039, 4.023, 4.007, 3.991, 3.975, 3.959, 3.943, 3.927, 3.911, 3.895, 3.879, 3.863, 3.847, 3.831, 3.815, 3.799, 3.783, 3.767, 3.751, 3.735, 3.719, 3.703, 3.687, 3.671, 3.655, 3.639, 3.623, 3.607, 3.591, 3.575, 3.559, 3.543, 3.527, 3.511, 3.495, 3.479, 3.463, 3.447, 3.431, 3.415, 3.399, 3.383, 3.367, 3.351, 3.335, 3.319, 3.303, 3.287, 3.271, 3.255, 3.239, 3.223, 3.207, 3.191, 3.175, 3.159, 3.143, 3.127, 3.111, 3.095, 3.079, 3.063, 3.047, 3.031, 3.015, 2.999, 2.983, 2.967, 2.951, 2.935, 2.919, 2.903, 2.887, 2.871, 2.855, 2.839, 2.823, 2.807, 2.791, 2.775, 2.759, 2.743, 2.727, 2.711, 2.695, 2.679, 2.663, 2.647, 2.631, 2.615, 2.599, 2.583, 2.567, 2.551, 2.535, 2.519, 2.503, 2.487, 2.471, 2.455, 2.439, 2.423, 2.407, 2.391, 2.375, 2.359, 2.343, 2.327, 2.311, 2.295, 2.279, 2.263, 2.247, 2.231, 2.215, 2.199, 2.183, 2.167, 2.151, 2.135, 2.119, 2.103, 2.087, 2.071, 2.055, 2.039, 2.023, 2.007, 1.991, 1.975, 1.959, 1.943, 1.927, 1.911, 1.895, 1.879, 1.863, 1.847, 1.831, 1.815, 1.799, 1.783, 1.767, 1.751, 1.735, 1.719, 1.703, 1.687, 1.671, 1.655, 1.639, 1.623, 1.607, 1.591, 1.575, 1.559, 1.543, 1.527, 1.511, 1.495, 1.479, 1.463, 1.447, 1.431, 1.415, 1.399, 1.383, 1.367, 1.351, 1.335, 1.319, 1.303, 1.287, 1.271, 1.255, 1.239, 1.223, 1.207, 1.191, 1.175, 1.159, 1.143, 1.127, 1.111, 1.095, 1.079, 1.063, 1.047, 1.031, 1.015, 0.999, 0.983, 0.967, 0.951, 0.935, 0.919, 0.903, 0.887, 0.871, 0.855, 0.839, 0.823, 0.807, 0.791, 0.775, 0.759, 0.743, 0.727, 0.711, 0.695, 0.679, 0.663, 0.647, 0.631, 0.615, 0.599, 0.583, 0.567, 0.551, 0.535, 0.519, 0.503, 0.487, 0.471, 0.455, 0.439, 0.423, 0.407, 0.391, 0.375, 0.359, 0.343, 0.327, 0.311, 0.295, 0.279, 0.263, 0.247, 0.231, 0.215, 0.199, 0.183, 0.167, 0.151, 0.135, 0.119, 0.103, 0.087, 0.071, 0.055, 0.039, 0.023, 0.007, 2.34

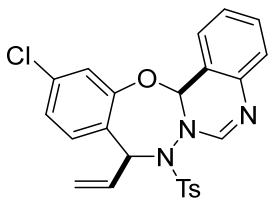

**3ma**

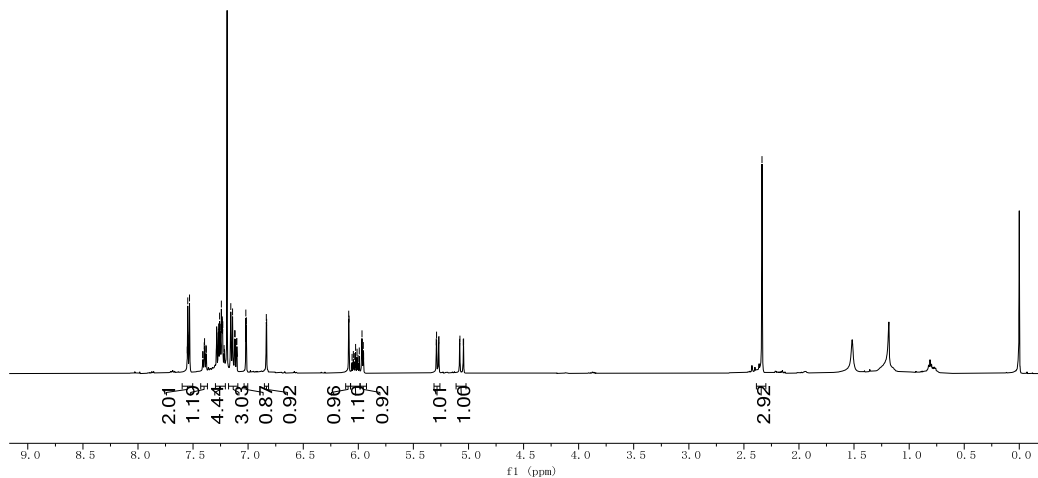

<sup>13</sup>C NMR (126 MHz, CDCl<sub>3</sub>)

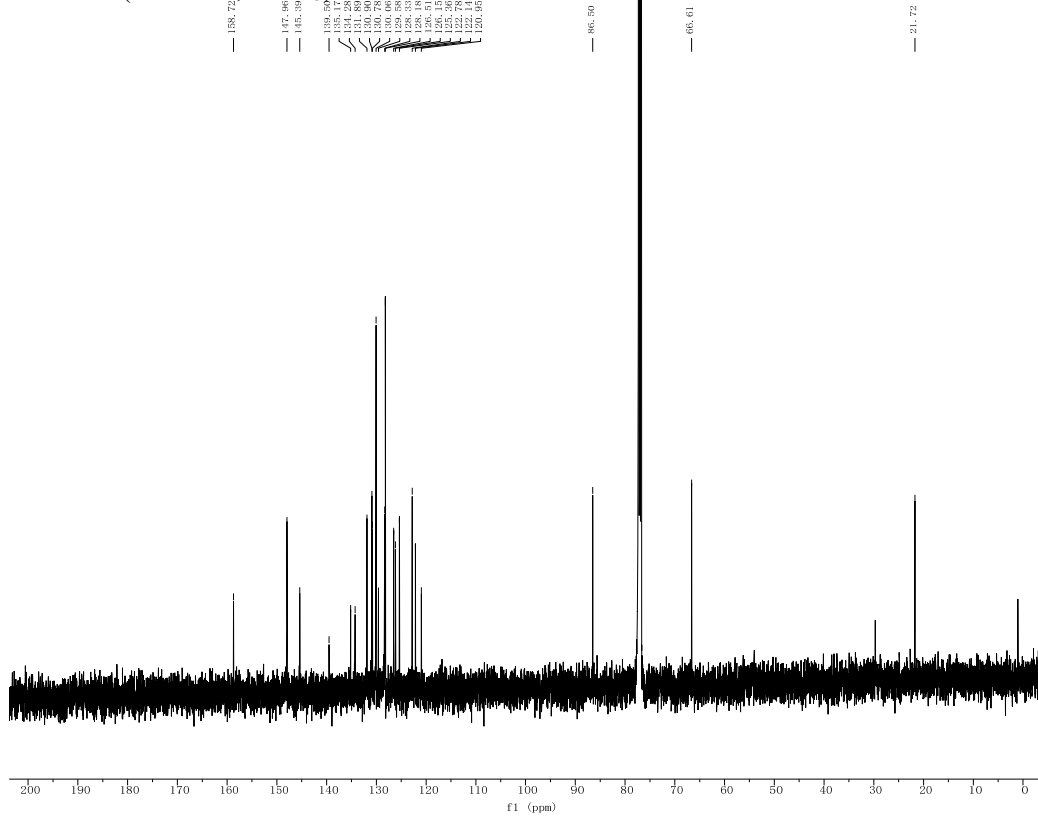





$^1\text{H}$  NMR spectrum (500 MHz,  $\text{CDCl}_3$ )

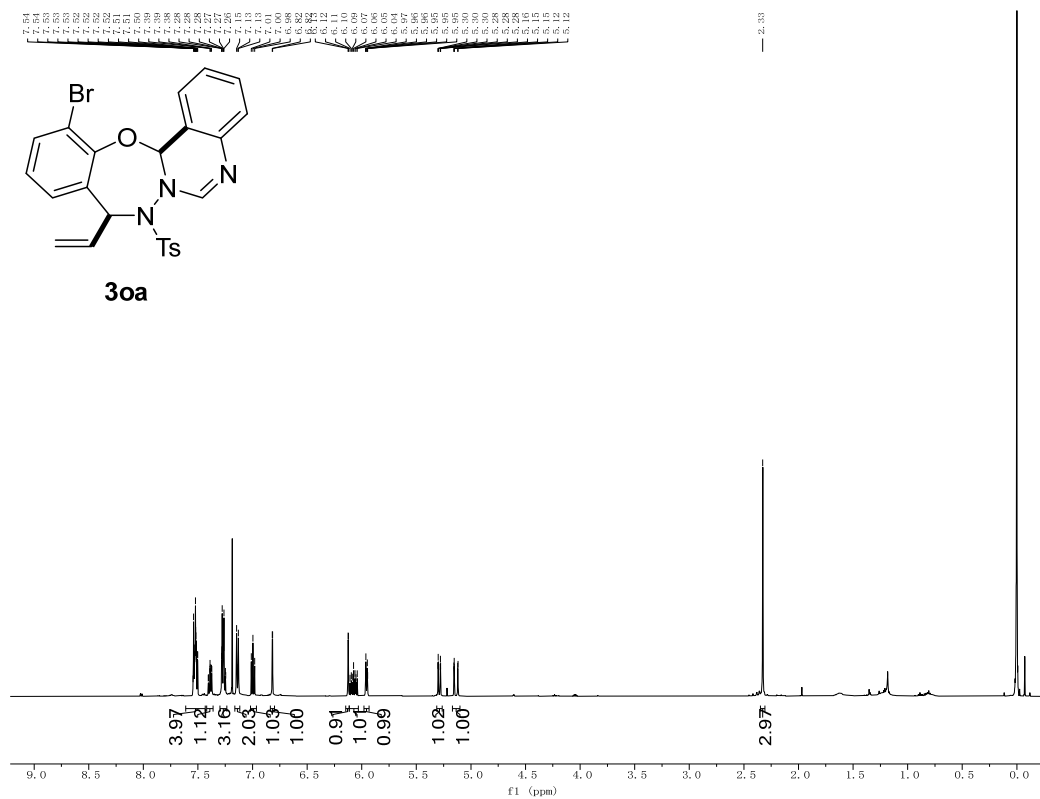

$^{13}\text{C}$  NMR (126 MHz,  $\text{CDCl}_3$ )

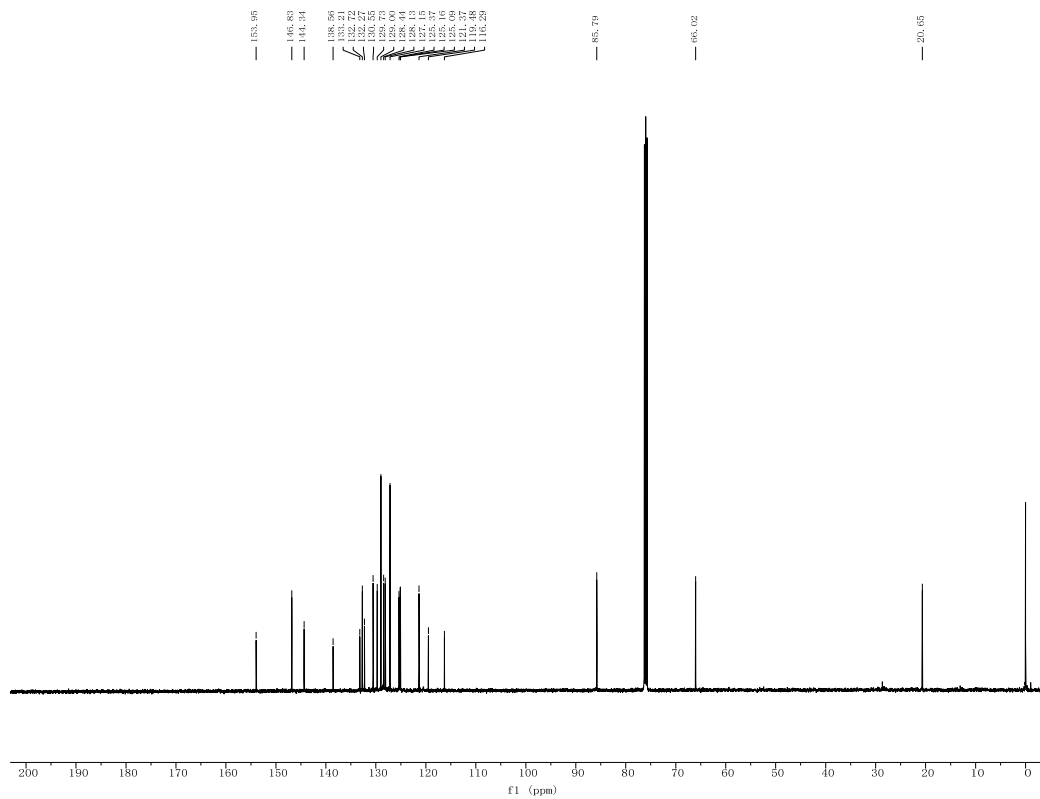

<sup>1</sup>H NMR spectrum (500 MHz, CDCl<sub>3</sub>)

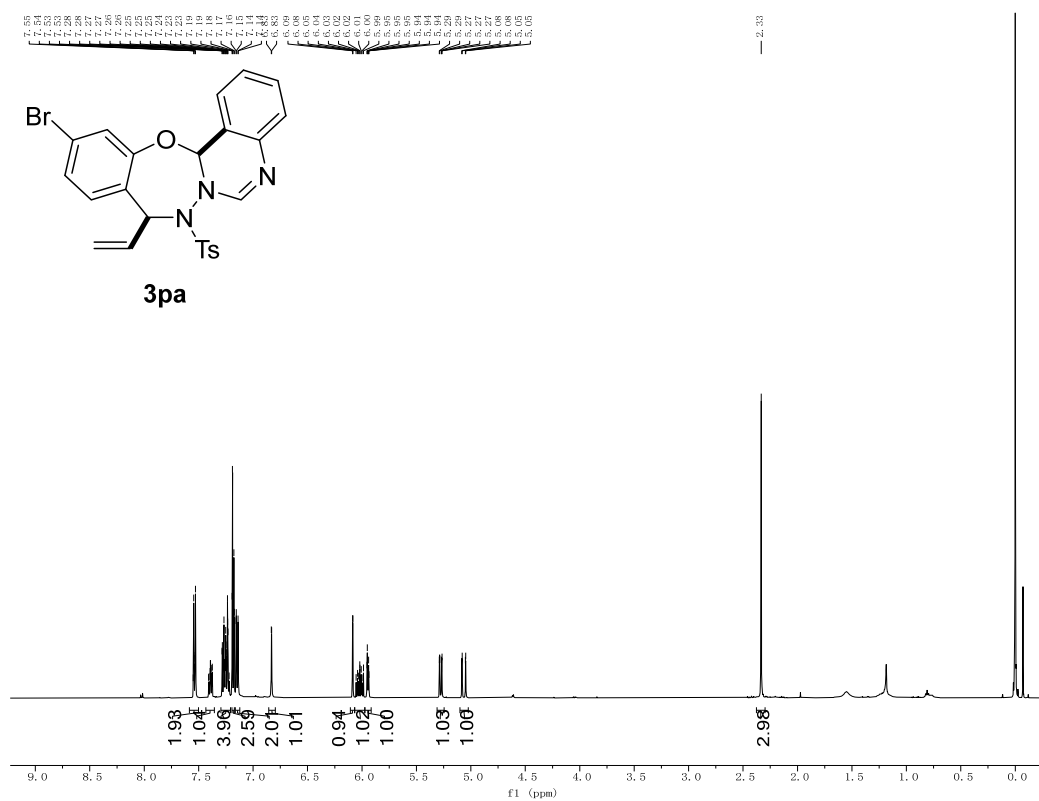

<sup>13</sup>C NMR (126 MHz, CDCl<sub>3</sub>)

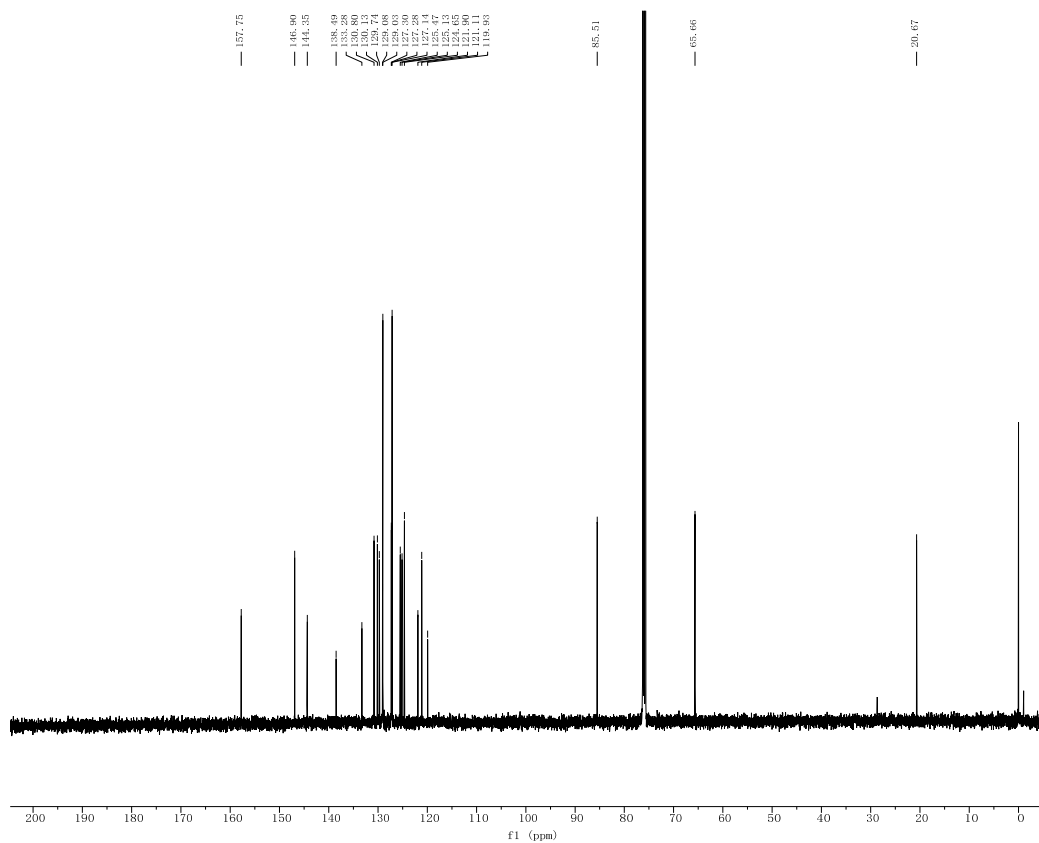

<sup>1</sup>H NMR spectrum (500 MHz, CDCl<sub>3</sub>)

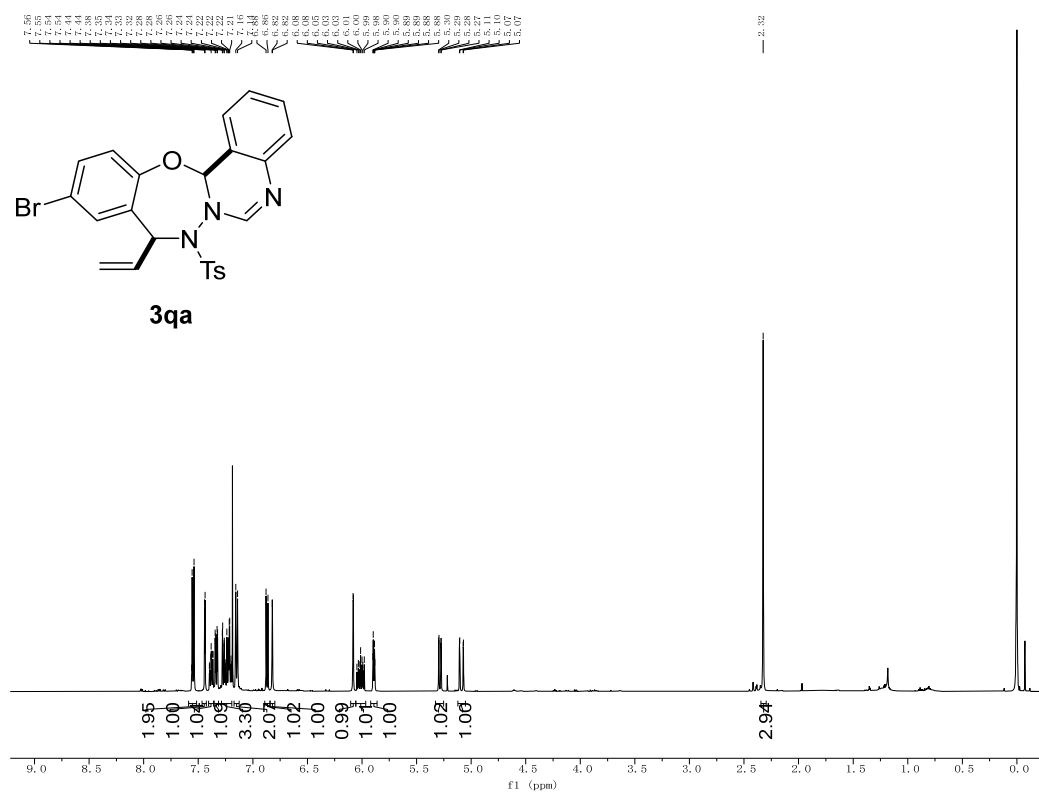

<sup>13</sup>C NMR spectrum (126 MHz, CDCl<sub>3</sub>)

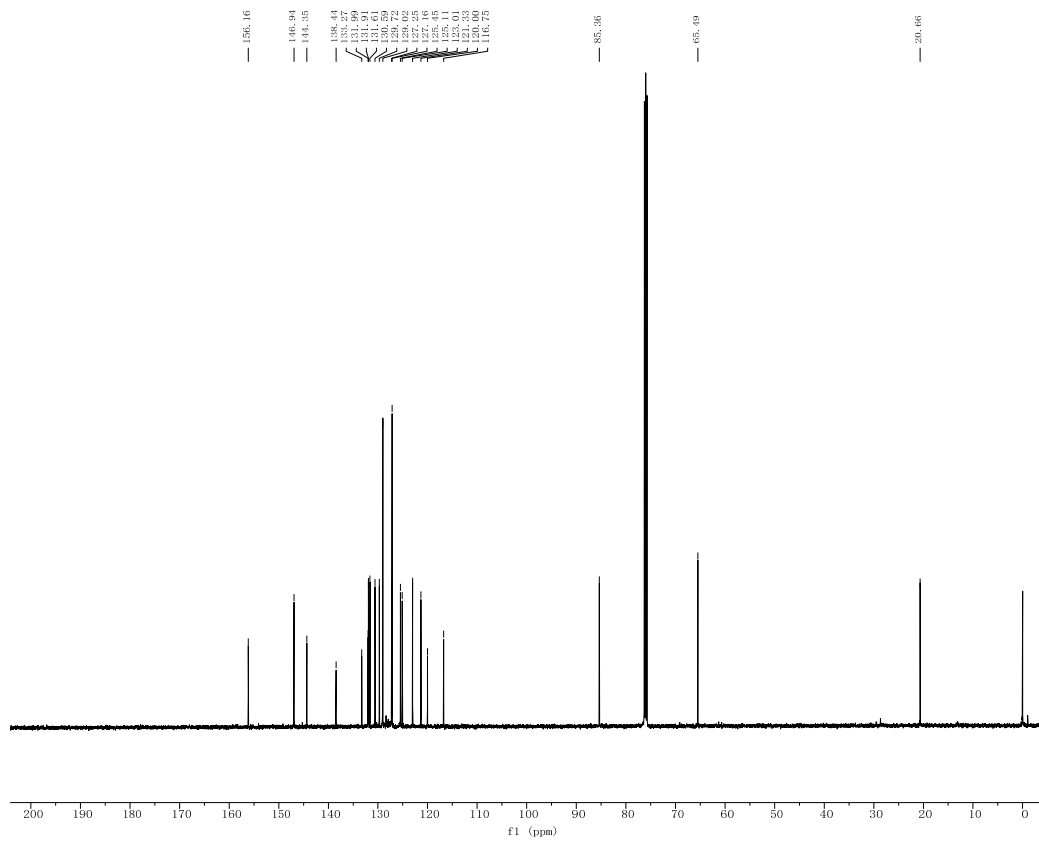

<sup>1</sup>H NMR spectrum (500 MHz, CDCl<sub>3</sub>)

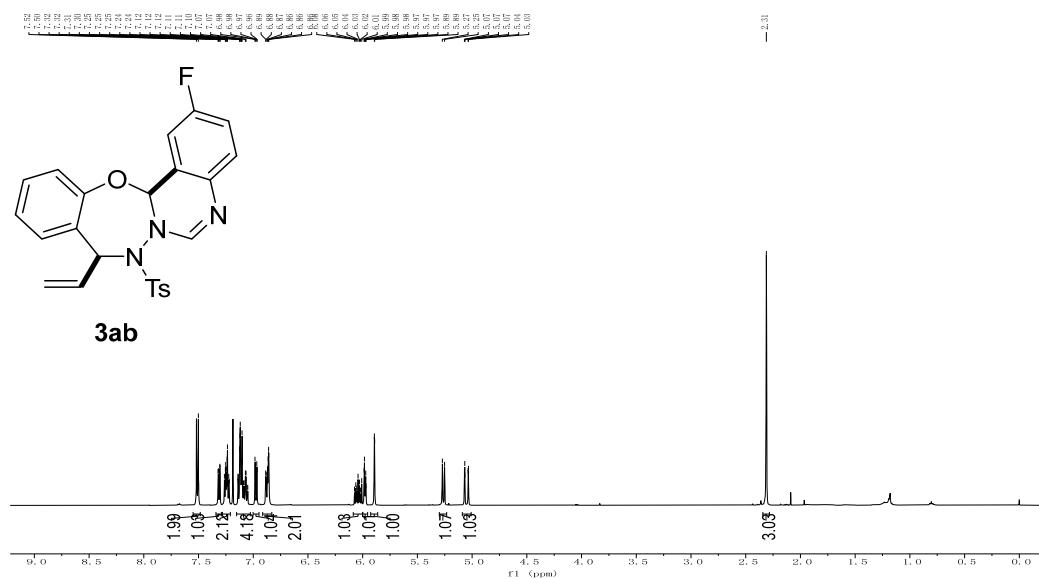

<sup>13</sup>C NMR spectrum (126 MHz, CDCl<sub>3</sub>)

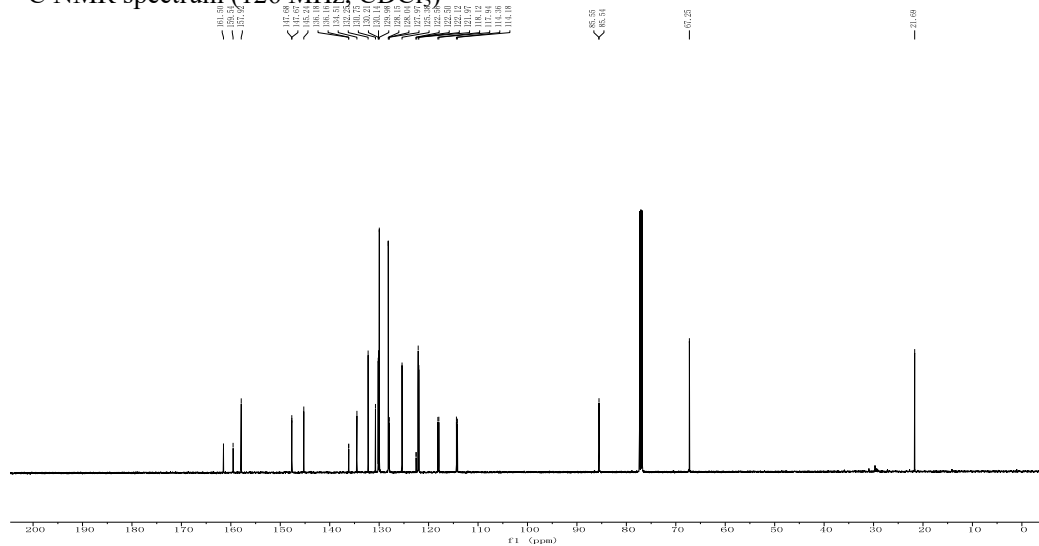

<sup>19</sup>F NMR (471 MHz, CDCl<sub>3</sub>)

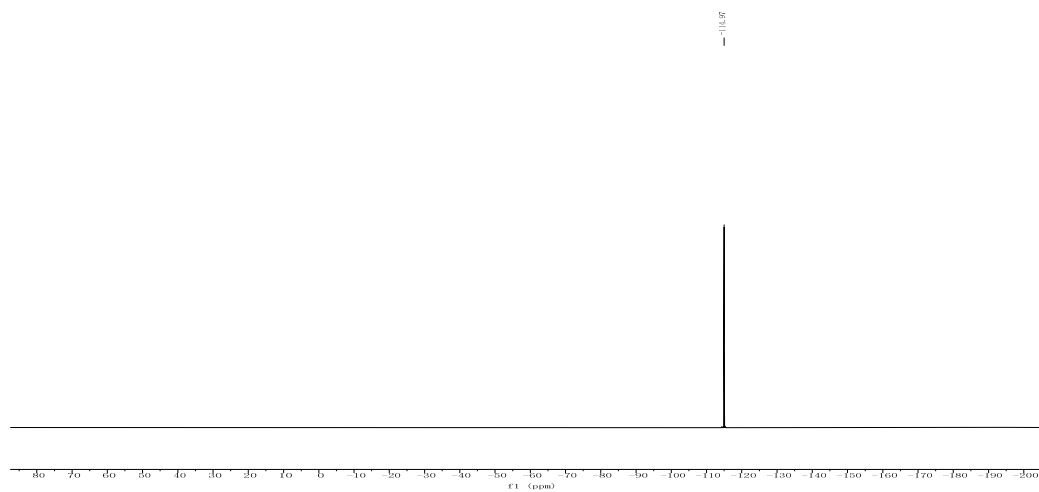



$^1\text{H}$  NMR spectrum (500 MHz,  $\text{CDCl}_3$ )

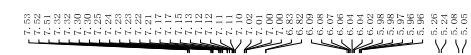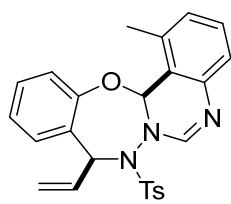

**3ad**

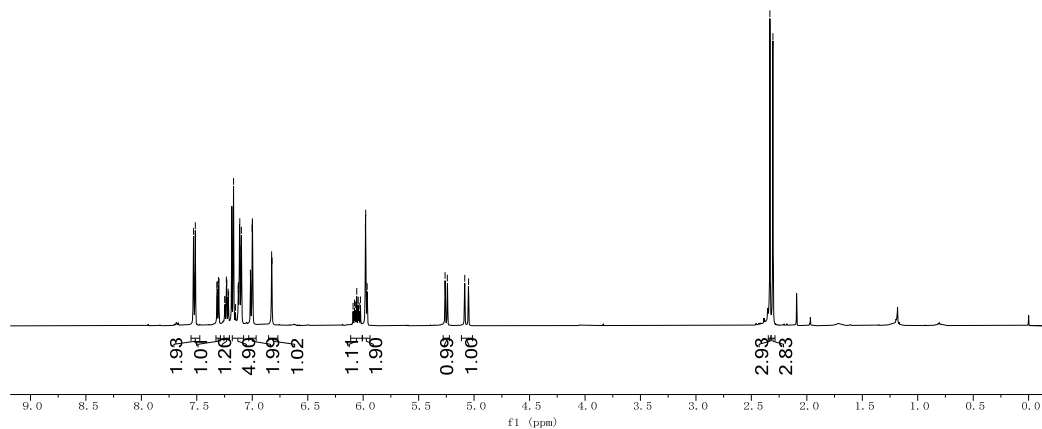

$^{13}\text{C}$  NMR spectrum (126 MHz,  $\text{CDCl}_3$ )

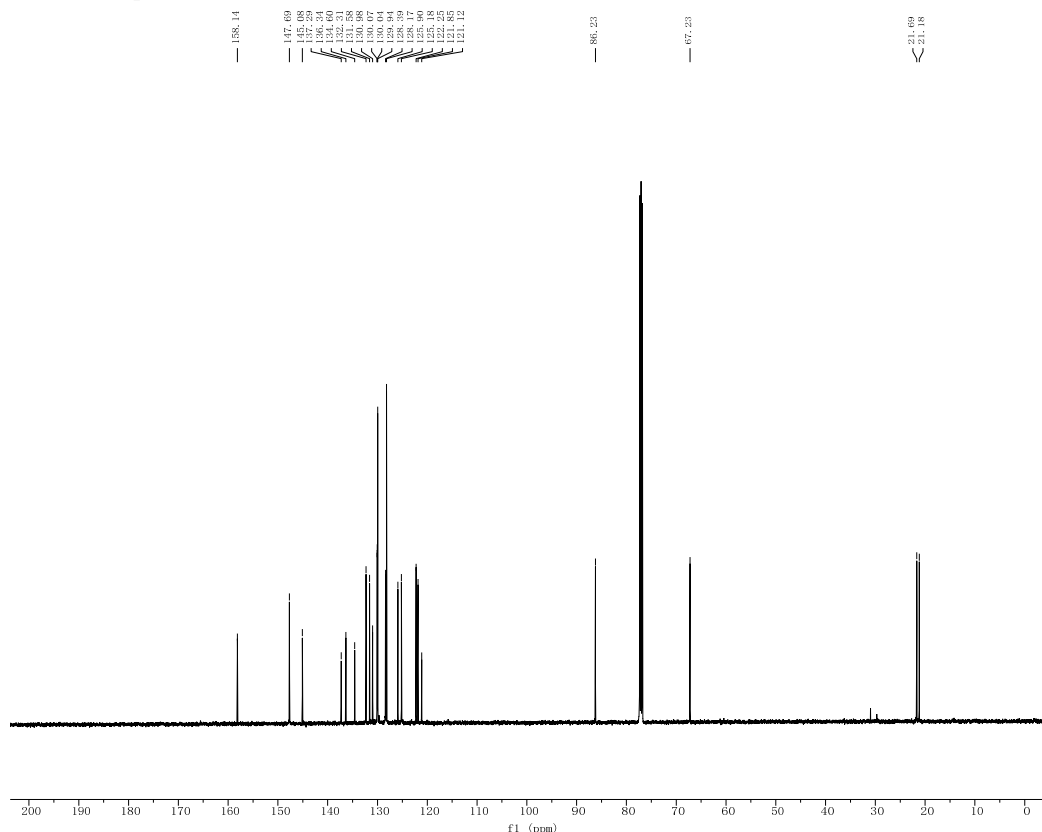

<sup>1</sup>H NMR spectrum (500 MHz, CDCl<sub>3</sub>)

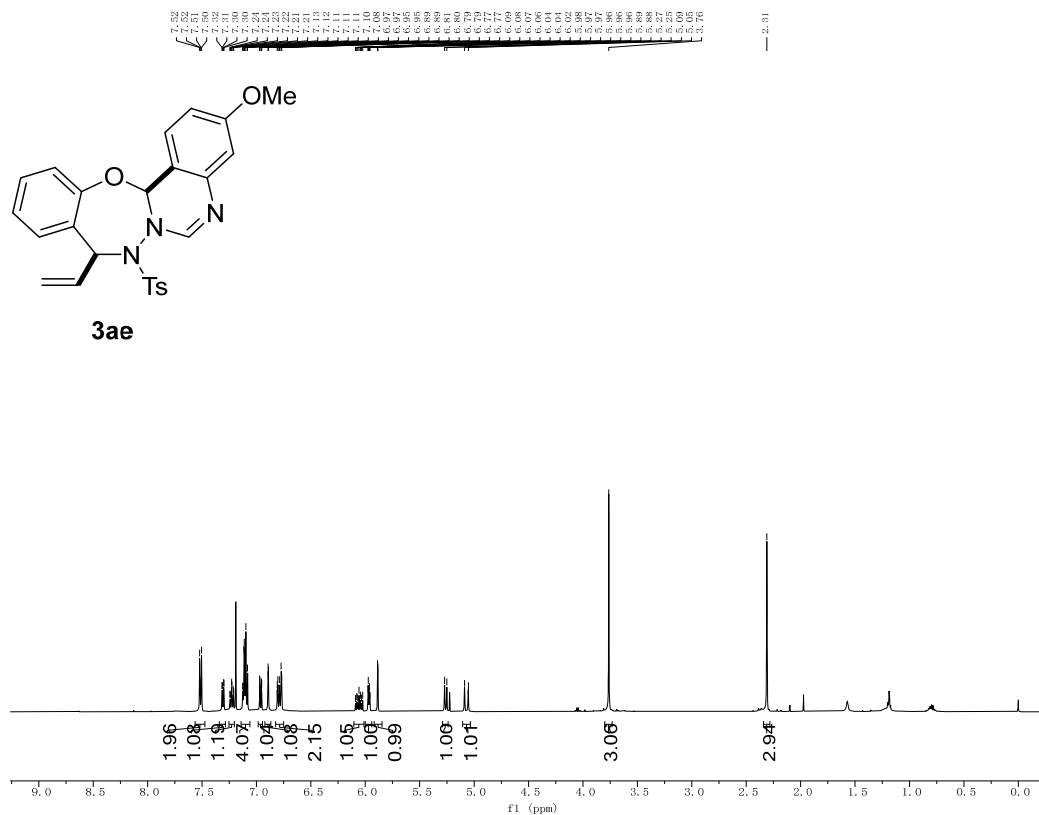

<sup>13</sup>C NMR spectrum (126 MHz, CDCl<sub>3</sub>)

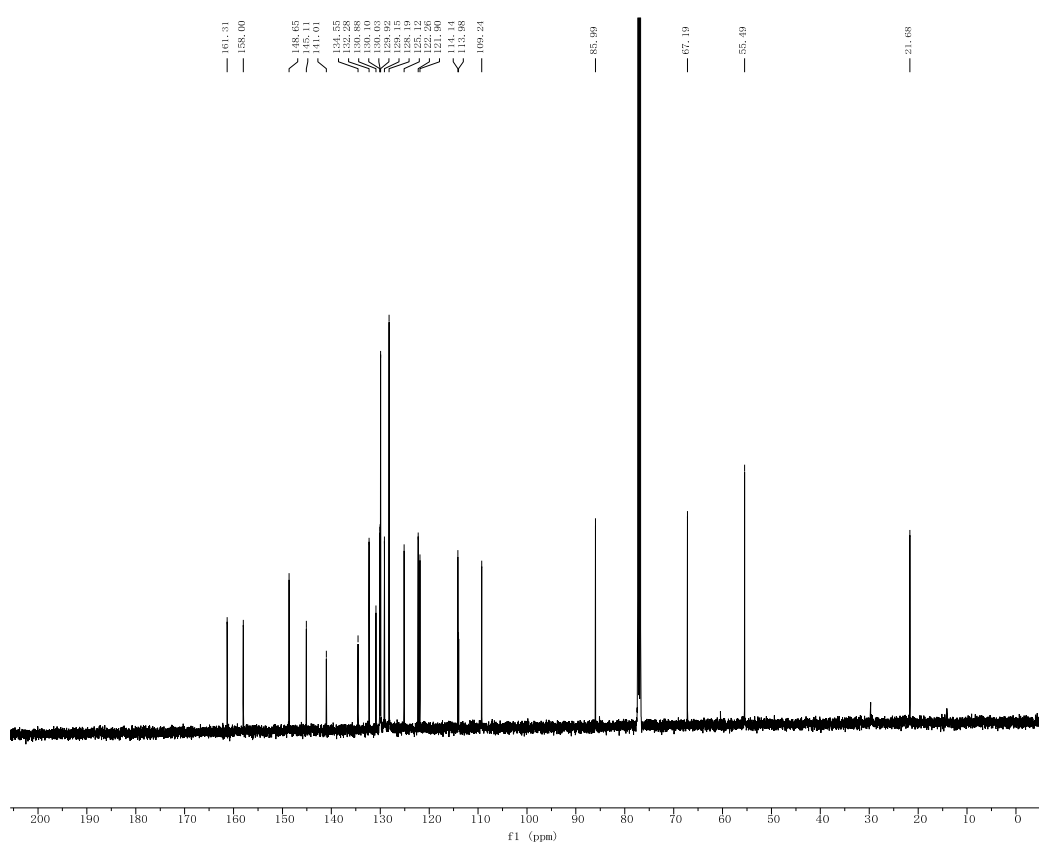

<sup>1</sup>H NMR spectrum (500 MHz, CDCl<sub>3</sub>)

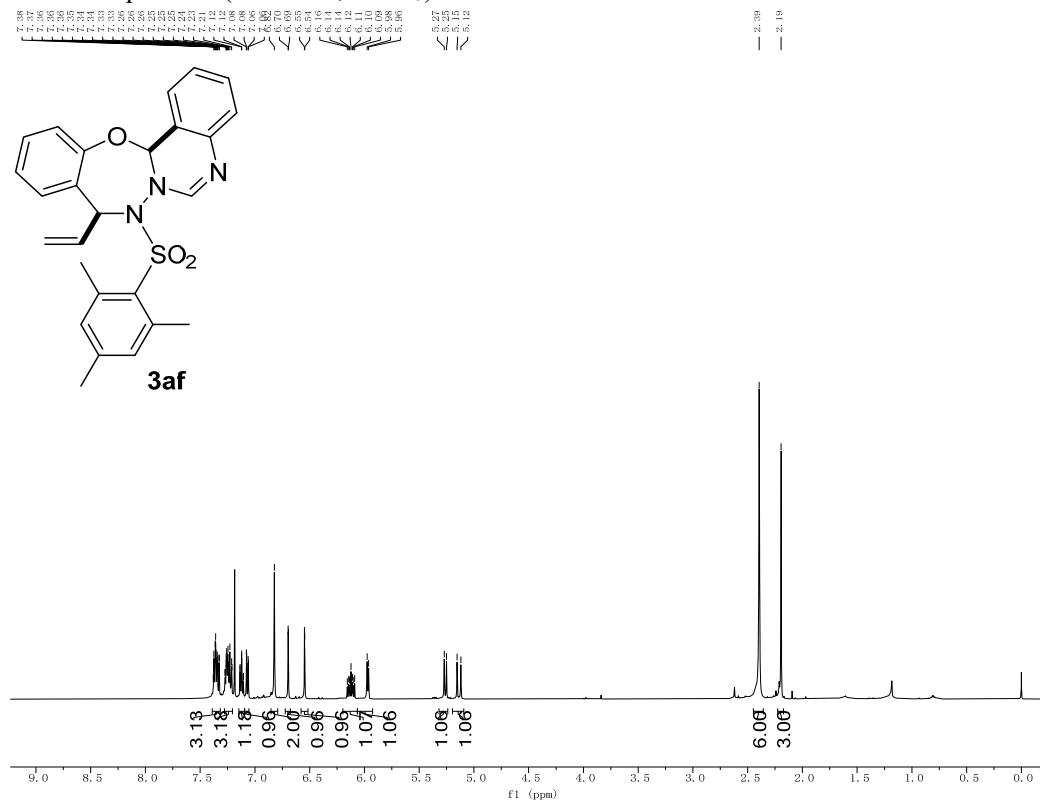

<sup>13</sup>C NMR spectrum (126 MHz, CDCl<sub>3</sub>)

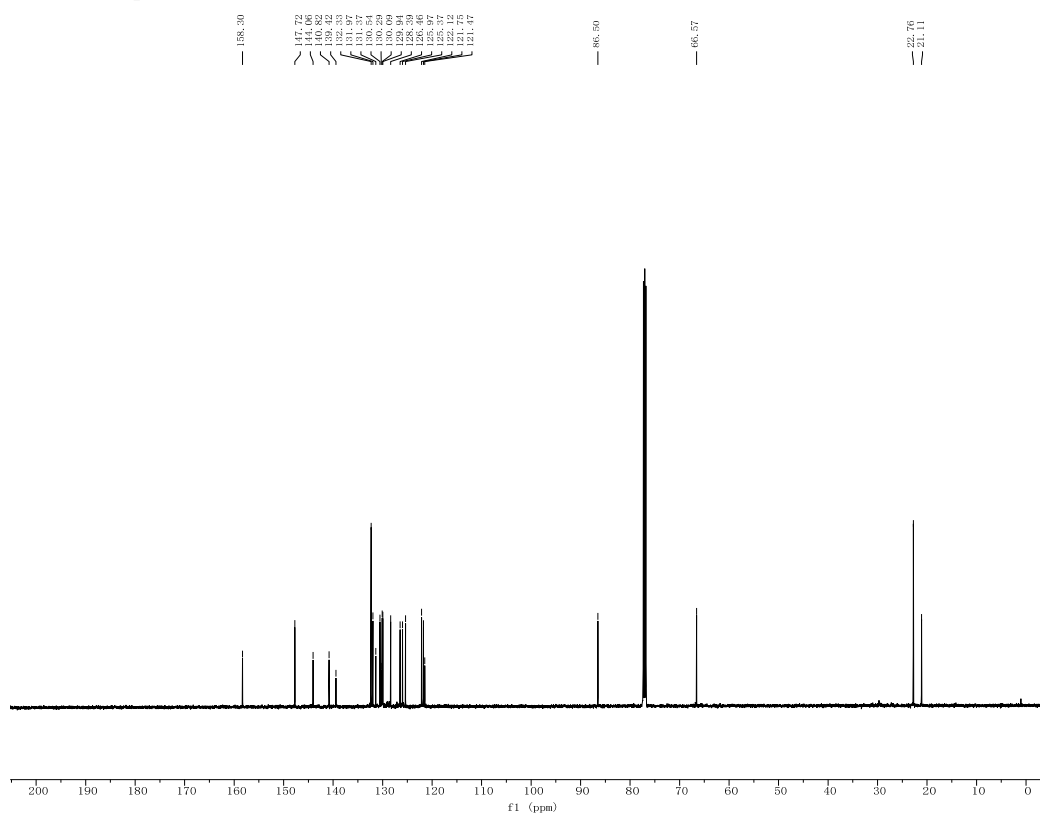



<sup>1</sup>H NMR spectrum (500 MHz, CDCl<sub>3</sub>)

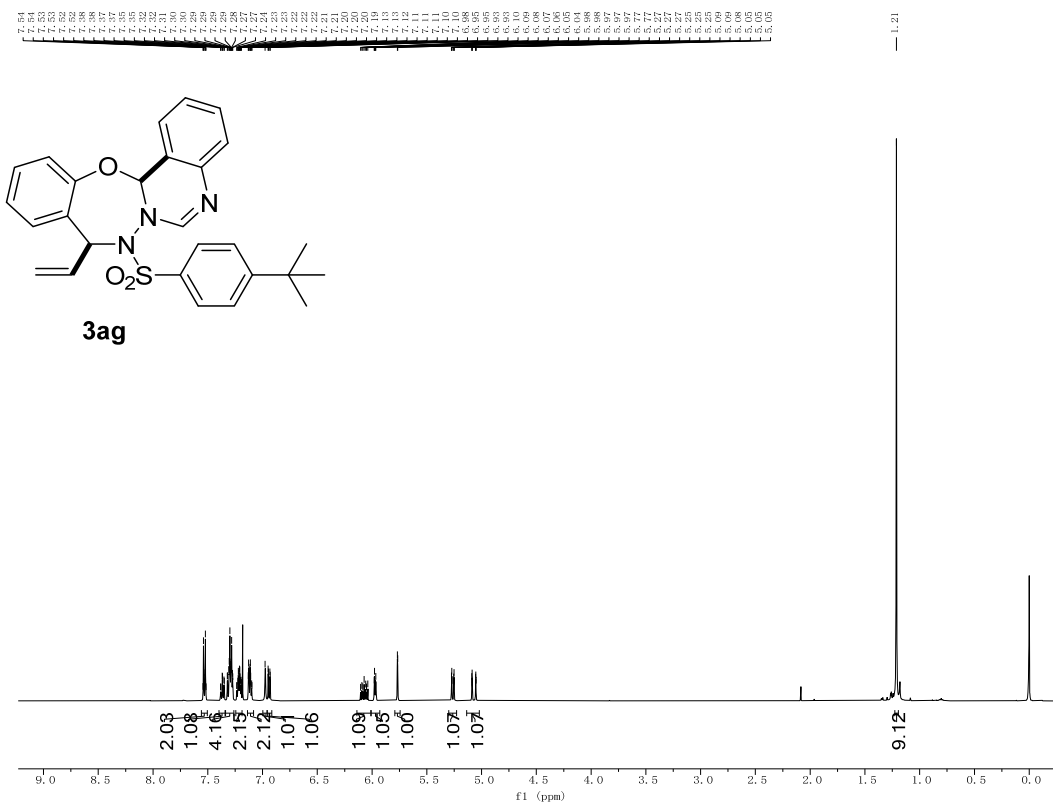

<sup>13</sup>C NMR spectrum (126 MHz, CDCl<sub>3</sub>)

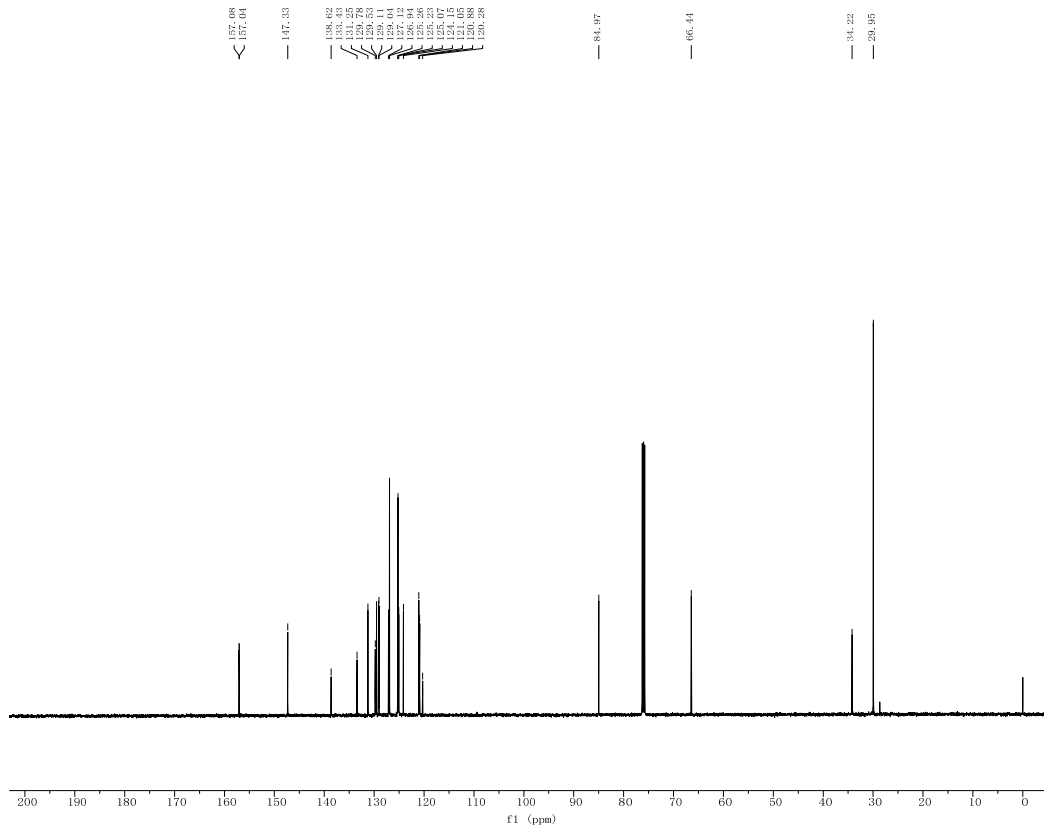

<sup>1</sup>H NMR spectrum (500 MHz, CDCl<sub>3</sub>)

7.525  
7.514  
7.504  
7.494  
7.484  
7.474  
7.464  
7.454  
7.444  
7.434  
7.424  
7.414  
7.404  
7.394  
7.384  
7.374  
7.364  
7.354  
7.344  
7.334  
7.324  
7.314  
7.304  
7.294  
7.284  
7.274  
7.264  
7.254  
7.244  
7.234  
7.224  
7.214  
7.204  
7.194  
7.184  
7.174  
7.164  
7.154  
7.144  
7.134  
7.124  
7.114  
7.104  
7.094  
7.084  
7.074  
7.064  
7.054  
7.044  
7.034  
7.024  
7.014  
7.004  
6.994  
6.984  
6.974  
6.964  
6.954  
6.944  
6.934  
6.924  
6.914  
6.904  
6.894  
6.884  
6.874  
6.864  
6.854  
6.844  
6.834  
6.824  
6.814  
6.804  
6.794  
6.784  
6.774  
6.764  
6.754  
6.744  
6.734  
6.724  
6.714  
6.704  
6.694  
6.684  
6.674  
6.664  
6.654  
6.644  
6.634  
6.624  
6.614  
6.604  
6.594  
6.584  
6.574  
6.564  
6.554  
6.544  
6.534  
6.524  
6.514  
6.504  
6.494  
6.484  
6.474  
6.464  
6.454  
6.444  
6.434  
6.424  
6.414  
6.404  
6.394  
6.384  
6.374  
6.364  
6.354  
6.344  
6.334  
6.324  
6.314  
6.304  
6.294  
6.284  
6.274  
6.264  
6.254  
6.244  
6.234  
6.224  
6.214  
6.204  
6.194  
6.184  
6.174  
6.164  
6.154  
6.144  
6.134  
6.124  
6.114  
6.104  
6.094  
6.084  
6.074  
6.064  
6.054  
6.044  
6.034  
6.024  
6.014  
6.004  
5.994  
5.984  
5.974  
5.964  
5.954  
5.944  
5.934  
5.924  
5.914  
5.904  
5.894  
5.884  
5.874  
5.864  
5.854  
5.844  
5.834  
5.824  
5.814  
5.804  
5.794  
5.784  
5.774  
5.764  
5.754  
5.744  
5.734  
5.724  
5.714  
5.704  
5.694  
5.684  
5.674  
5.664  
5.654  
5.644  
5.634  
5.624  
5.614  
5.604  
5.594  
5.584  
5.574  
5.564  
5.554  
5.544  
5.534  
5.524  
5.514  
5.504  
5.494  
5.484  
5.474  
5.464  
5.454  
5.444  
5.434  
5.424  
5.414  
5.404  
5.394  
5.384  
5.374  
5.364  
5.354  
5.344  
5.334  
5.324  
5.314  
5.304  
5.294  
5.284  
5.274  
5.264  
5.254  
5.244  
5.234  
5.224  
5.214  
5.204  
5.194  
5.184  
5.174  
5.164  
5.154  
5.144  
5.134  
5.124  
5.114  
5.104  
5.094  
5.084  
5.074  
5.064  
5.054  
5.044  
5.034  
5.024  
5.014  
5.004  
4.994  
4.984  
4.974  
4.964  
4.954  
4.944  
4.934  
4.924  
4.914  
4.904  
4.894  
4.884  
4.874  
4.864  
4.854  
4.844  
4.834  
4.824  
4.814  
4.804  
4.794  
4.784  
4.774  
4.764  
4.754  
4.744  
4.734  
4.724  
4.714  
4.704  
4.694  
4.684  
4.674  
4.664  
4.654  
4.644  
4.634  
4.624  
4.614  
4.604  
4.594  
4.584  
4.574  
4.564  
4.554  
4.544  
4.534  
4.524  
4.514  
4.504  
4.494  
4.484  
4.474  
4.464  
4.454  
4.444  
4.434  
4.424  
4.414  
4.404  
4.394  
4.384  
4.374  
4.364  
4.354  
4.344  
4.334  
4.324  
4.314  
4.304  
4.294  
4.284  
4.274  
4.264  
4.254  
4.244  
4.234  
4.224  
4.214  
4.204  
4.194  
4.184  
4.174  
4.164  
4.154  
4.144  
4.134  
4.124  
4.114  
4.104  
4.094  
4.084  
4.074  
4.064  
4.054  
4.044  
4.034  
4.024  
4.014  
4.004  
3.994  
3.984  
3.974  
3.964  
3.954  
3.944  
3.934  
3.924  
3.914  
3.904  
3.894  
3.884  
3.874  
3.864  
3.854  
3.844  
3.834  
3.824  
3.814  
3.804  
3.794  
3.784  
3.774  
3.764  
3.754  
3.744  
3.734  
3.724  
3.714  
3.704  
3.694  
3.684  
3.674  
3.664  
3.654  
3.644  
3.634  
3.624  
3.614  
3.604  
3.594  
3.584  
3.574  
3.564  
3.554  
3.544  
3.534  
3.524  
3.514  
3.504  
3.494  
3.484  
3.474  
3.464  
3.454  
3.444  
3.434  
3.424  
3.414  
3.404  
3.394  
3.384  
3.374  
3.364  
3.354  
3.344  
3.334  
3.324  
3.314  
3.304  
3.294  
3.284  
3.274  
3.264  
3.254  
3.244  
3.234  
3.224  
3.214  
3.204  
3.194  
3.184  
3.174  
3.164  
3.154  
3.144  
3.134  
3.124  
3.114  
3.104  
3.094  
3.084  
3.074  
3.064  
3.054  
3.044  
3.034  
3.024  
3.014  
3.004  
2.994  
2.984  
2.974  
2.964  
2.954  
2.944  
2.934  
2.924  
2.914  
2.904  
2.894  
2.884  
2.874  
2.864  
2.854  
2.844  
2.834  
2.824  
2.814  
2.804  
2.794  
2.784  
2.774  
2.764  
2.754  
2.744  
2.734  
2.724  
2.714  
2.704  
2.694  
2.684  
2.674  
2.664  
2.654  
2.644  
2.634  
2.624  
2.614  
2.604  
2.594  
2.584  
2.574  
2.564  
2.554  
2.544  
2.534  
2.524  
2.514  
2.504  
2.494  
2.484  
2.474  
2.464  
2.454  
2.444  
2.434  
2.424  
2.414  
2.404  
2.394  
2.384  
2.374  
2.364  
2.354  
2.344  
2.334  
2.324  
2.314  
2.304  
2.294  
2.284  
2.274  
2.264  
2.254  
2.244  
2.234  
2.224  
2.214  
2.204  
2.194  
2.184  
2.174  
2.164  
2.154  
2.144  
2.134  
2.124  
2.114  
2.104  
2.094  
2.084  
2.074  
2.064  
2.054  
2.044  
2.034  
2.024  
2.014  
2.004  
1.994  
1.984  
1.974  
1.964  
1.954  
1.944  
1.934  
1.924  
1.914  
1.904  
1.894  
1.884  
1.874  
1.864  
1.854  
1.844  
1.834  
1.824  
1.814  
1.804  
1.794  
1.784  
1.774  
1.764  
1.754  
1.744  
1.734  
1.724  
1.714  
1.704  
1.694  
1.684  
1.674  
1.664  
1.654  
1.644  
1.634  
1.624  
1.614  
1.604  
1.594  
1.584  
1.574  
1.564  
1.554  
1.544  
1.534  
1.524  
1.514  
1.504  
1.494  
1.484  
1.474  
1.464  
1.454  
1.444  
1.434  
1.424  
1.414  
1.404  
1.394  
1.384  
1.374  
1.364  
1.354  
1.344  
1.334  
1.324  
1.314  
1.304  
1.294  
1.284  
1.274  
1.264  
1.254  
1.244  
1.234  
1.224  
1.214  
1.204  
1.194  
1.184  
1.174  
1.164  
1.154  
1.144  
1.134  
1.124  
1.114  
1.104  
1.094  
1.084  
1.074  
1.064  
1.054  
1.044  
1.034  
1.024  
1.014  
1.004  
0.994  
0.984  
0.974  
0.964  
0.954  
0.944  
0.934  
0.924  
0.914  
0.904  
0.894  
0.884  
0.874  
0.864  
0.854  
0.844  
0.834  
0.824  
0.814  
0.804  
0.794  
0.784  
0.774  
0.764  
0.754  
0.744  
0.734  
0.724  
0.714  
0.704  
0.694  
0.684  
0.674  
0.664  
0.654  
0.644  
0.634  
0.624  
0.614  
0.604  
0.594  
0.584  
0.574  
0.564  
0.554  
0.544  
0.534  
0.524  
0.514  
0.504  
0.494  
0.484  
0.474  
0.464  
0.454  
0.444  
0.434  
0.424  
0.414  
0.404  
0.394  
0.384  
0.374  
0.364  
0.354  
0.344  
0.334  
0.324  
0.314  
0.304  
0.294  
0.284  
0.274  
0.264  
0.254  
0.244  
0.234  
0.224  
0.214  
0.204  
0.194  
0.184  
0.174  
0.164  
0.154  
0.144  
0.134  
0.124  
0.114  
0.104  
0.094  
0.084  
0.074  
0.064  
0.054  
0.044  
0.034  
0.024  
0.014  
0.004

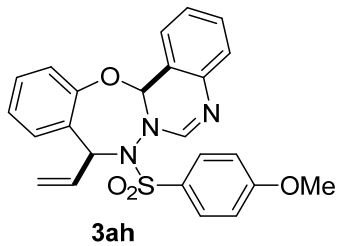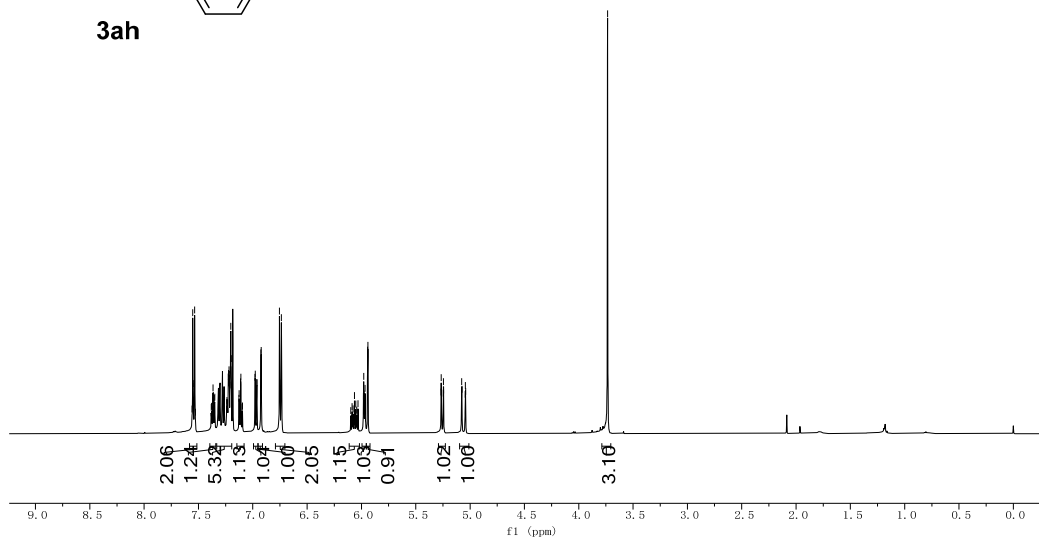

<sup>13</sup>C NMR spectrum (126 MHz, CDCl<sub>3</sub>)

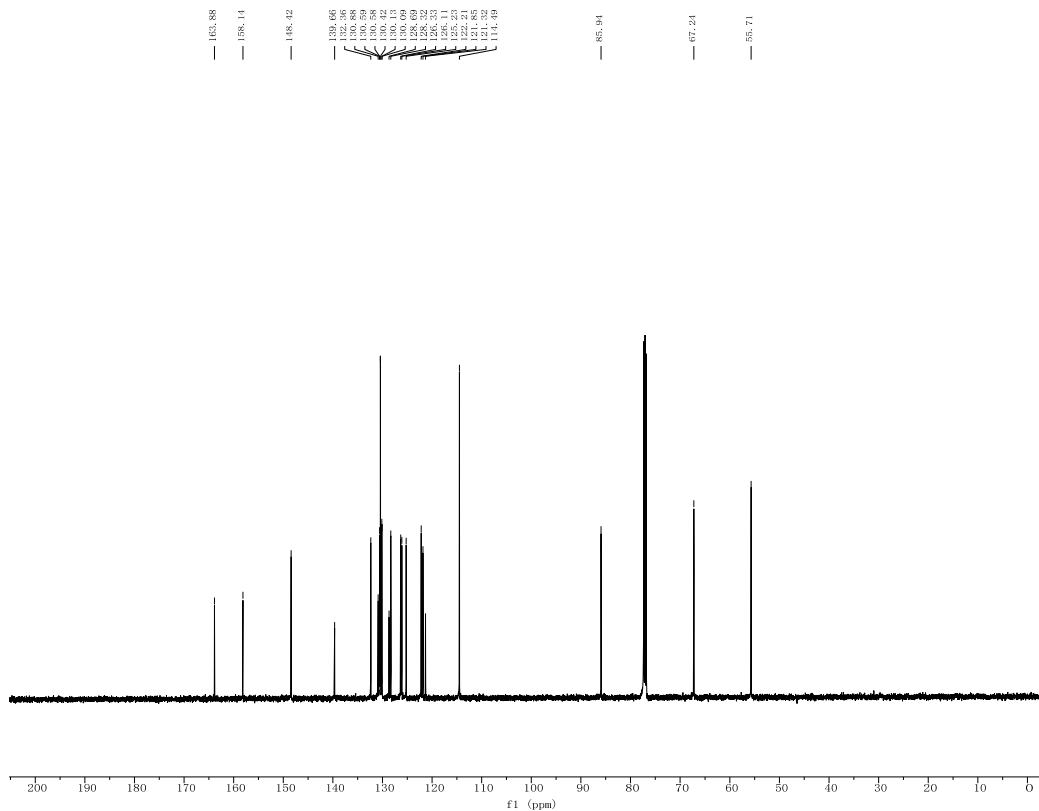

<sup>1</sup>H NMR spectrum (500 MHz, CDCl<sub>3</sub>)

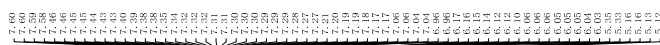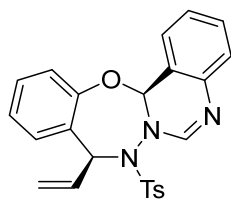

**4aa** (8:1 dr)

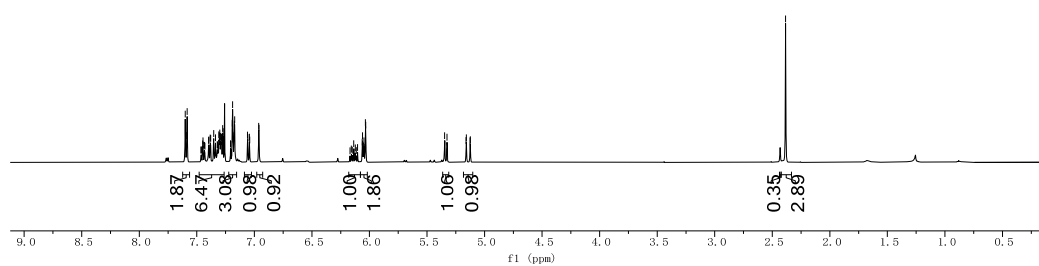

<sup>13</sup>C NMR spectrum (126 MHz, CDCl<sub>3</sub>)

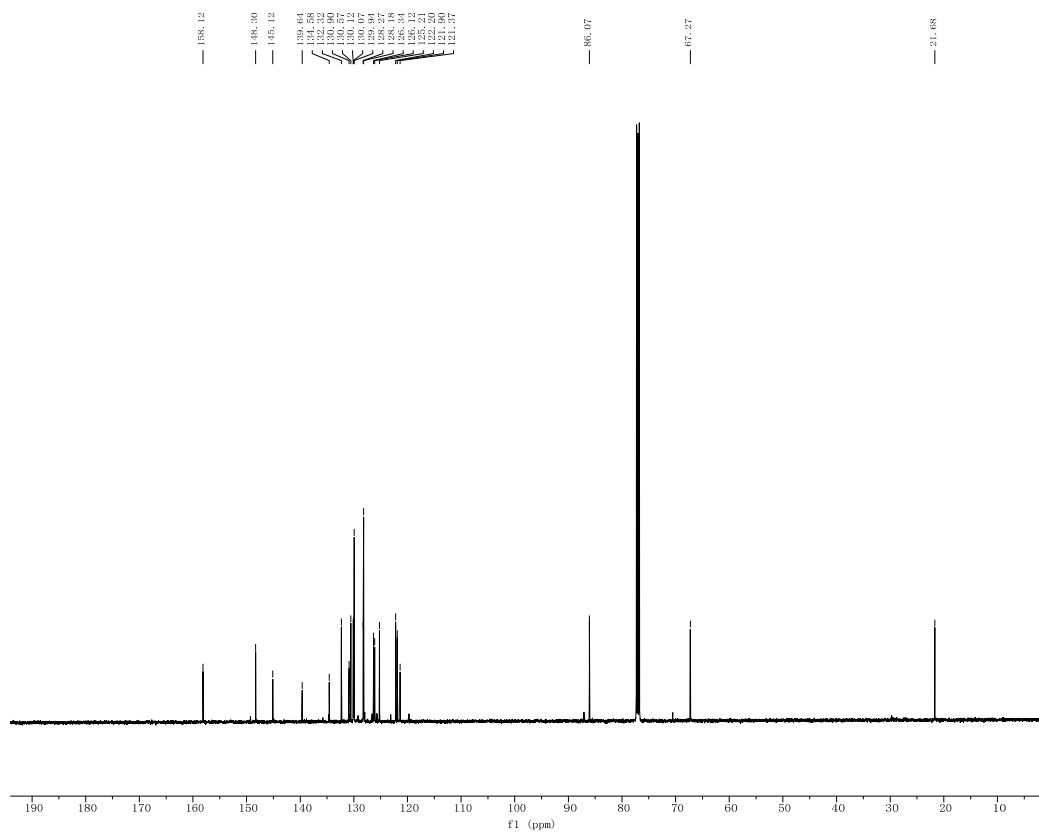

<sup>1</sup>H NMR spectrum (500 MHz, CDCl<sub>3</sub>)

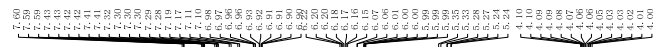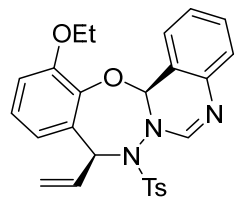

**4ba** (16:1 dr)

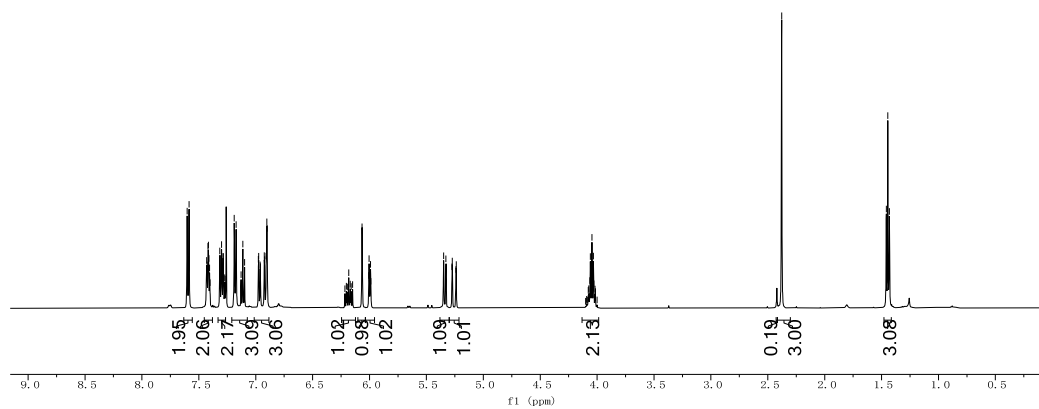

<sup>13</sup>C NMR spectrum (126 MHz, CDCl<sub>3</sub>)

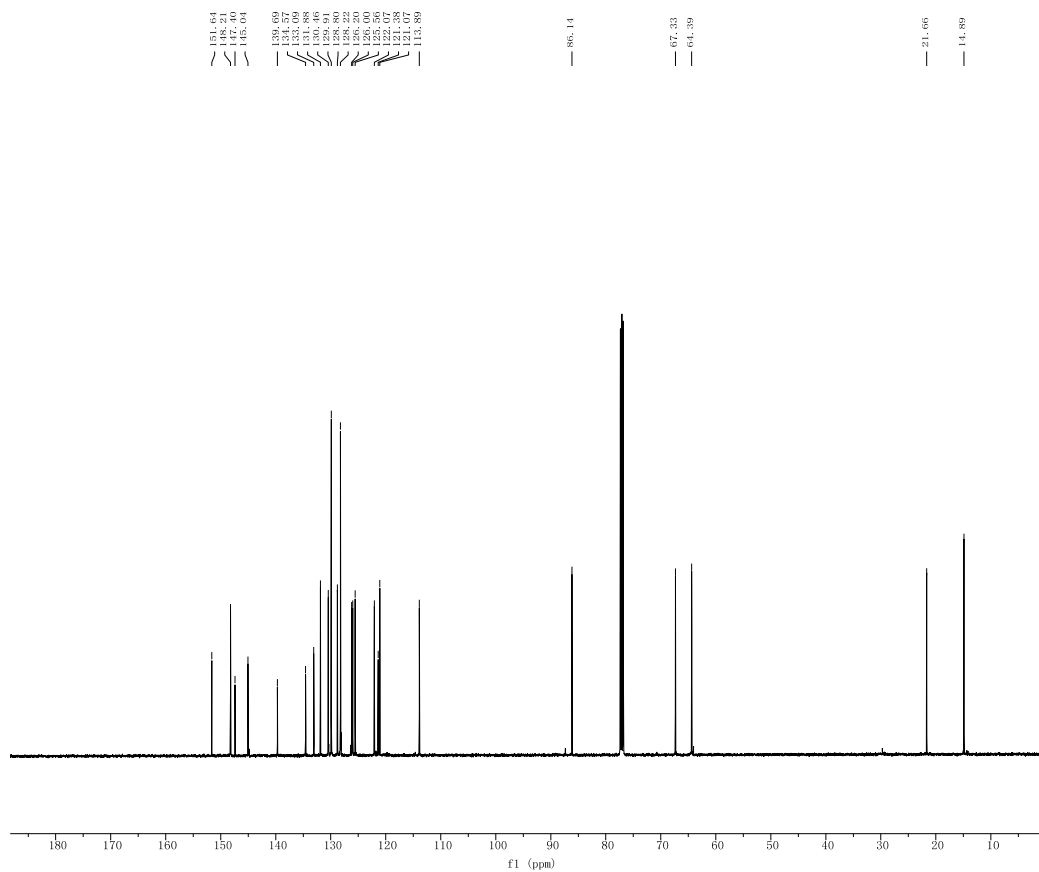

<sup>1</sup>H NMR spectrum (500 MHz, CDCl<sub>3</sub>)

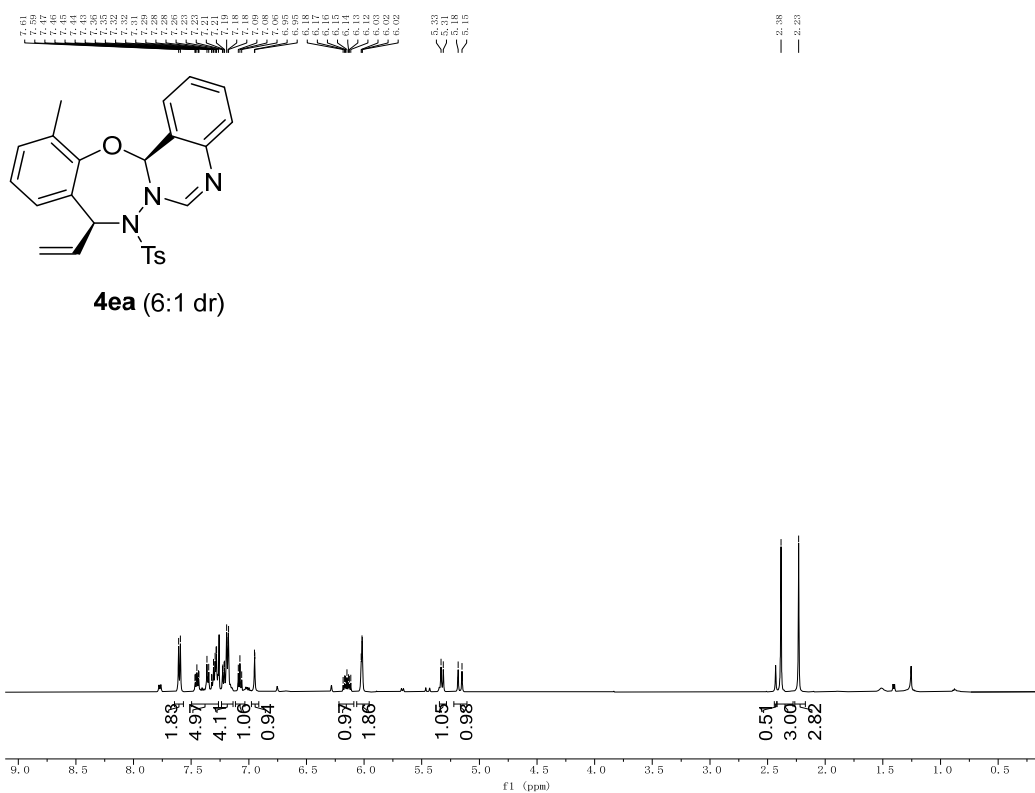

<sup>13</sup>C NMR spectrum (126 MHz, CDCl<sub>3</sub>)

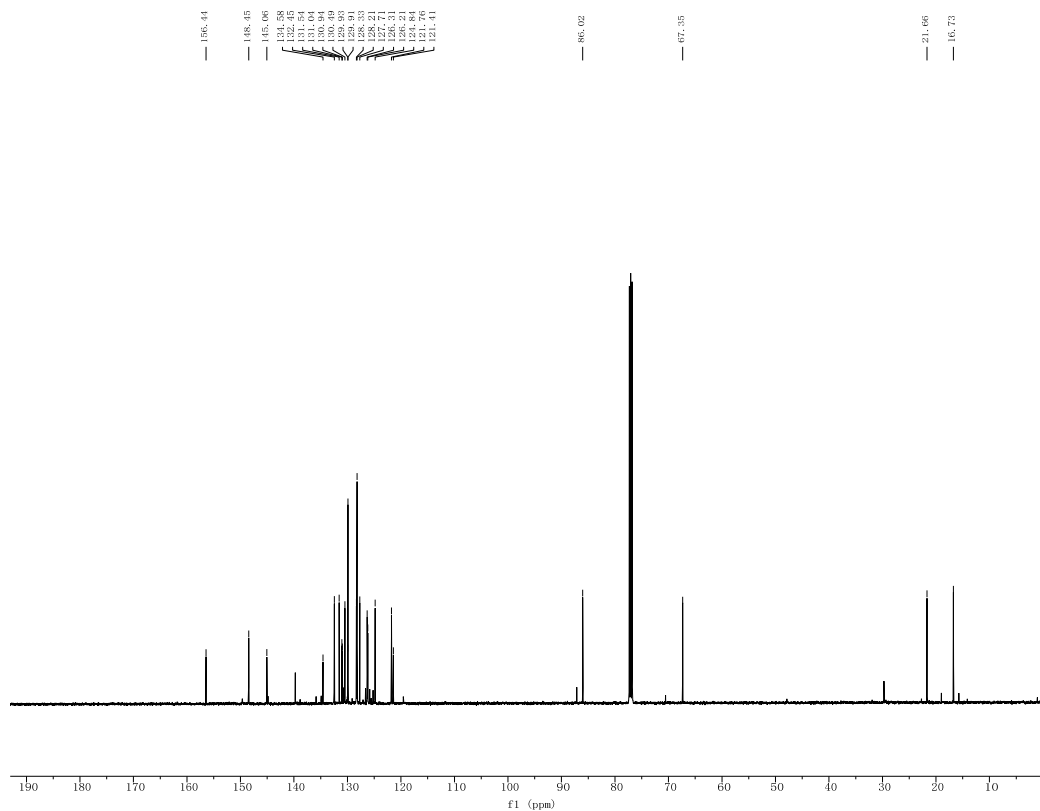

<sup>1</sup>H NMR spectrum (500 MHz, CDCl<sub>3</sub>)

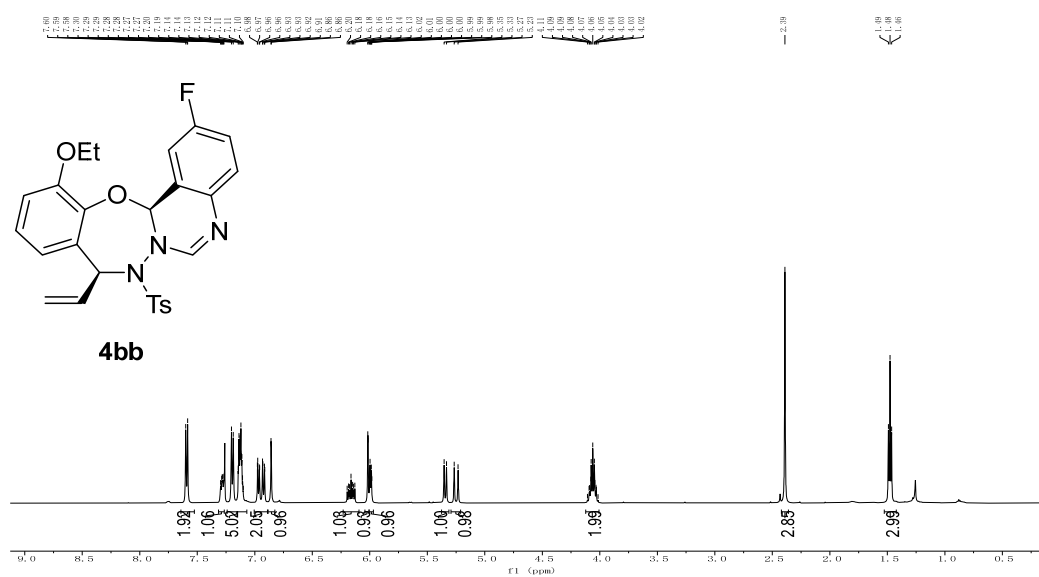

<sup>13</sup>C NMR spectrum (126 MHz, CDCl<sub>3</sub>)

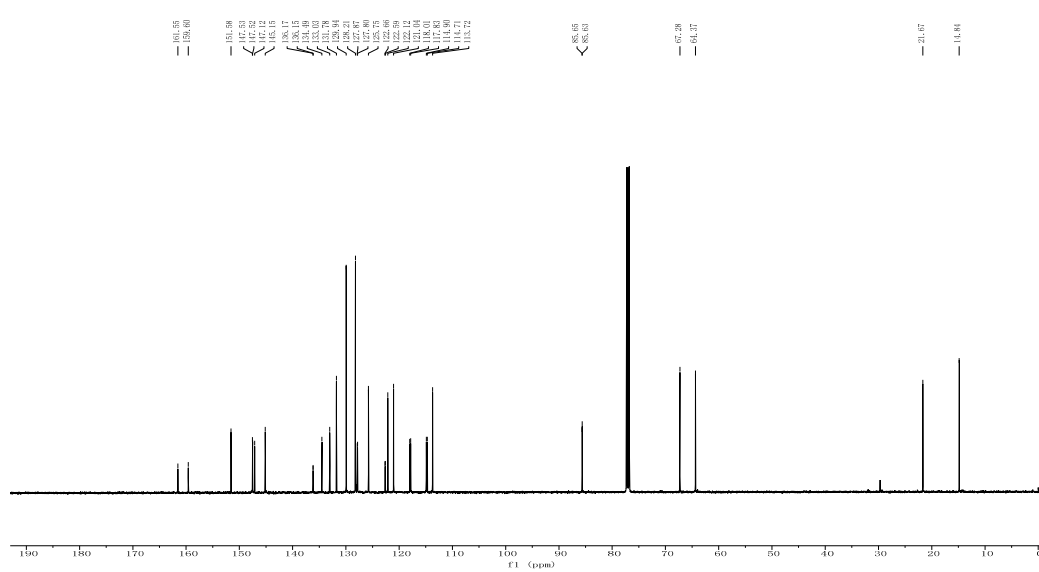

<sup>19</sup>F NMR (471 MHz, CDCl<sub>3</sub>) δ -115.46.

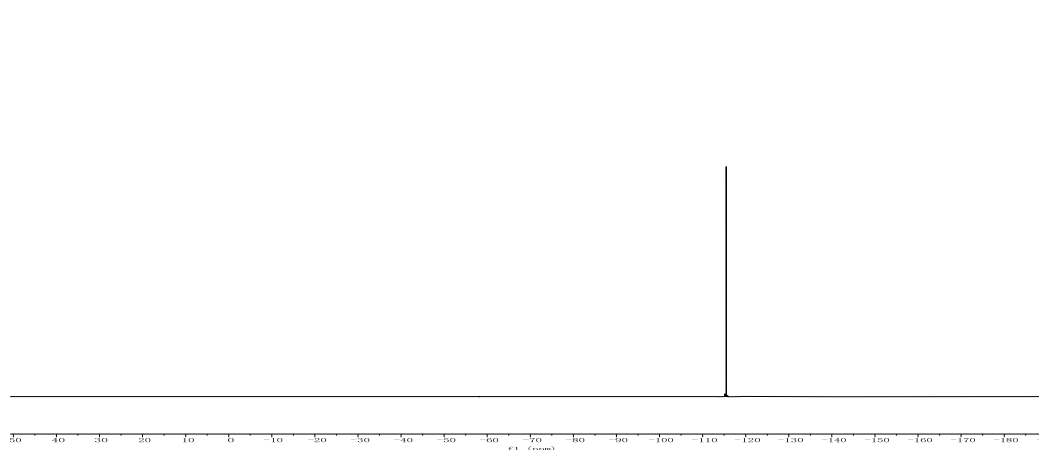

<sup>1</sup>H NMR spectrum (500 MHz, CDCl<sub>3</sub>)

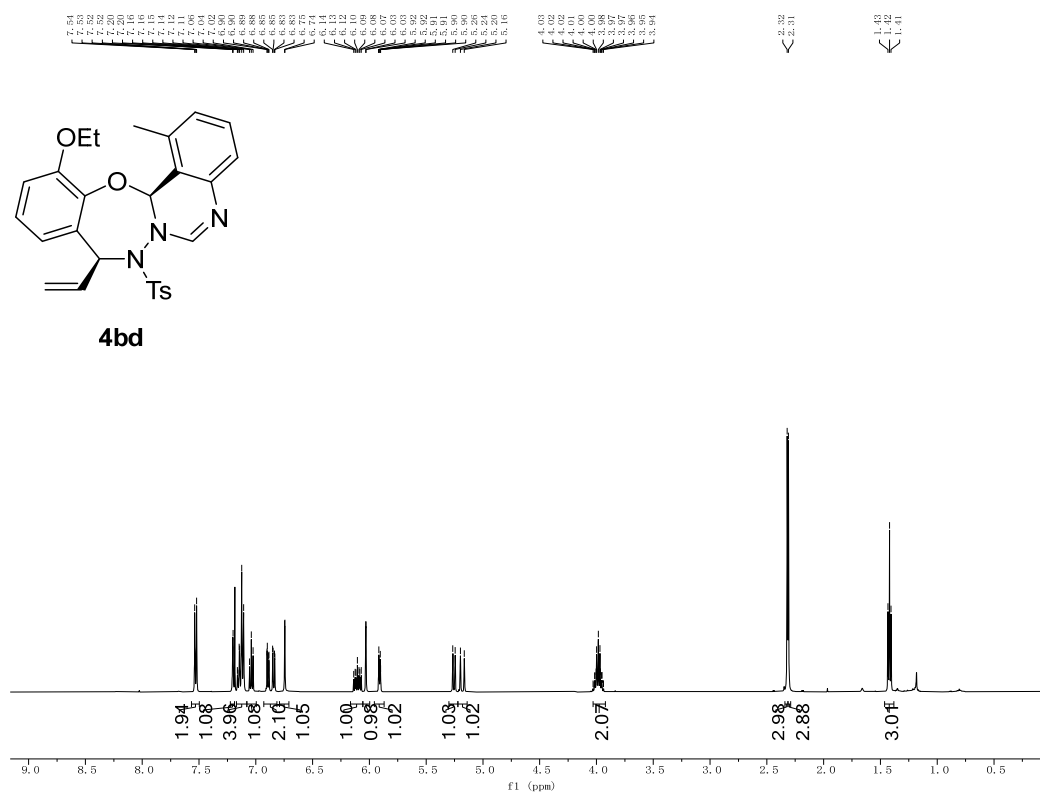

<sup>13</sup>C NMR spectrum (126 MHz, CDCl<sub>3</sub>)

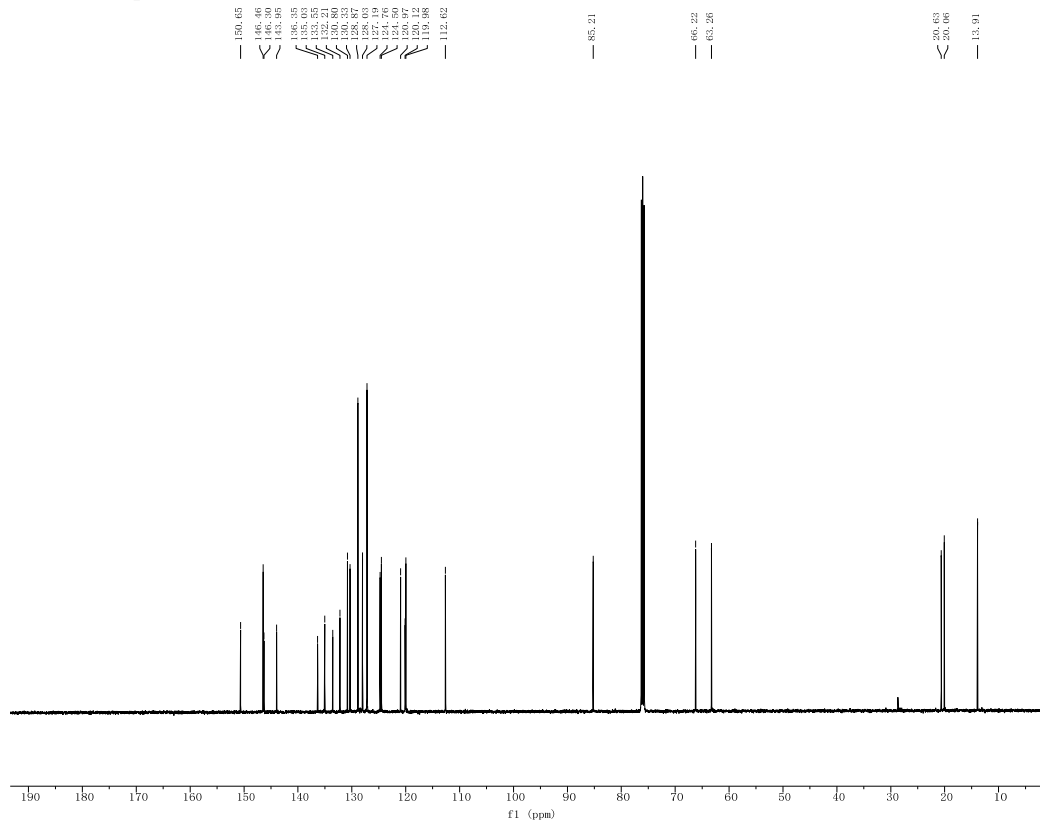

<sup>1</sup>H NMR spectrum (500 MHz, CDCl<sub>3</sub>)

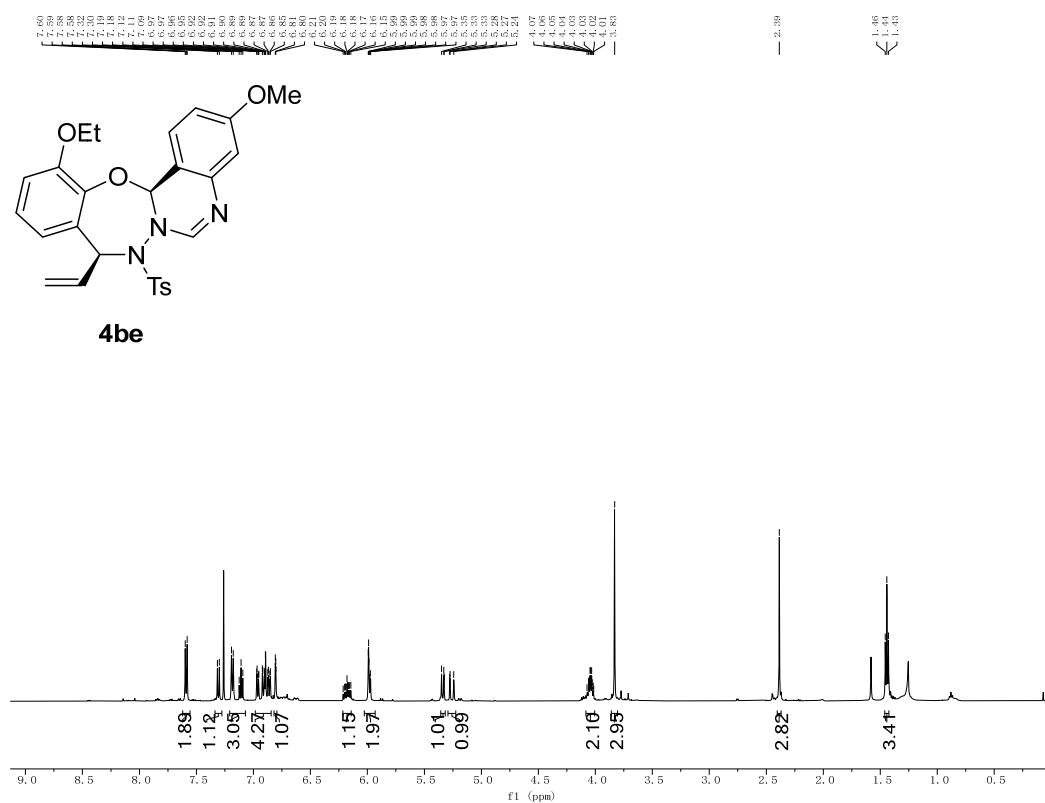

<sup>13</sup>C NMR spectrum (126 MHz, CDCl<sub>3</sub>)

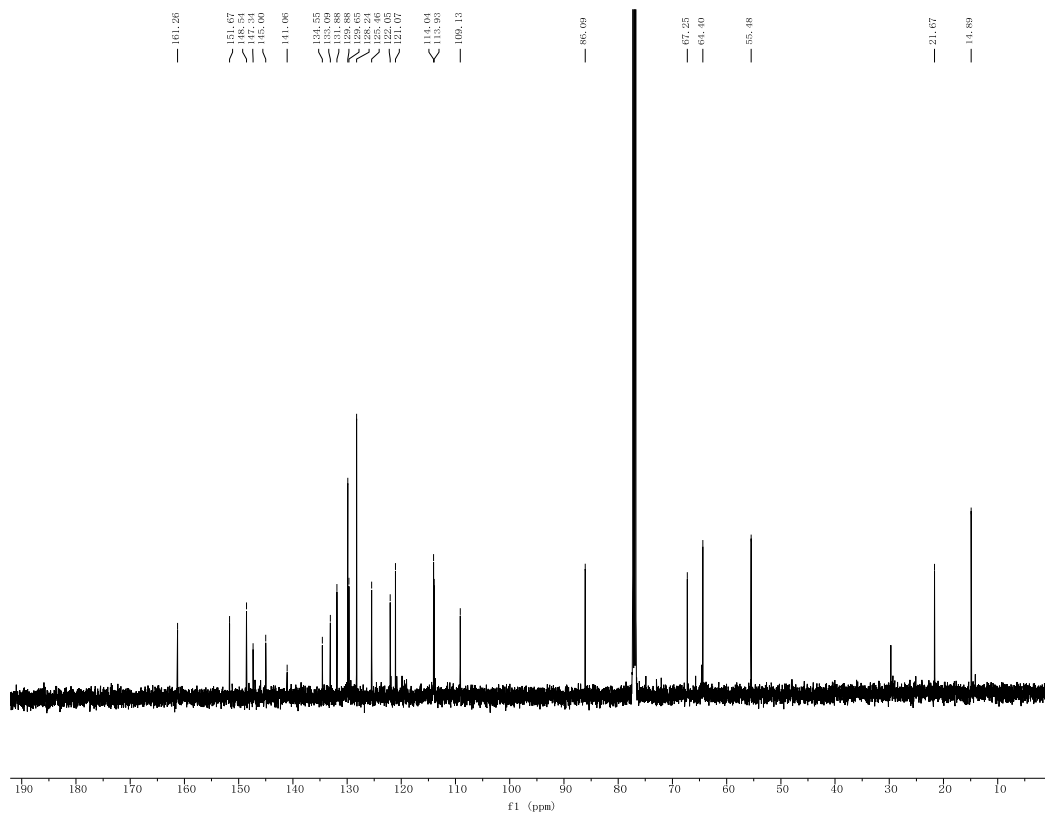



<sup>1</sup>H NMR spectrum (500 MHz, CDCl<sub>3</sub>)

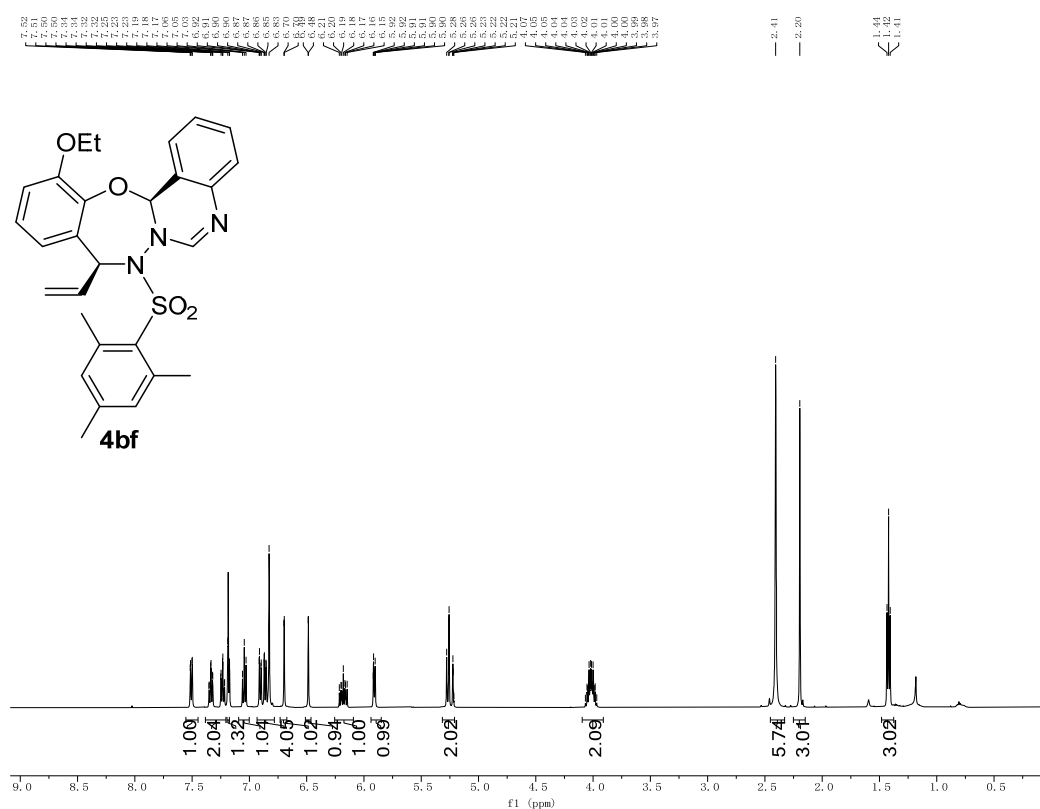

<sup>13</sup>C NMR spectrum (126 MHz, CDCl<sub>3</sub>)

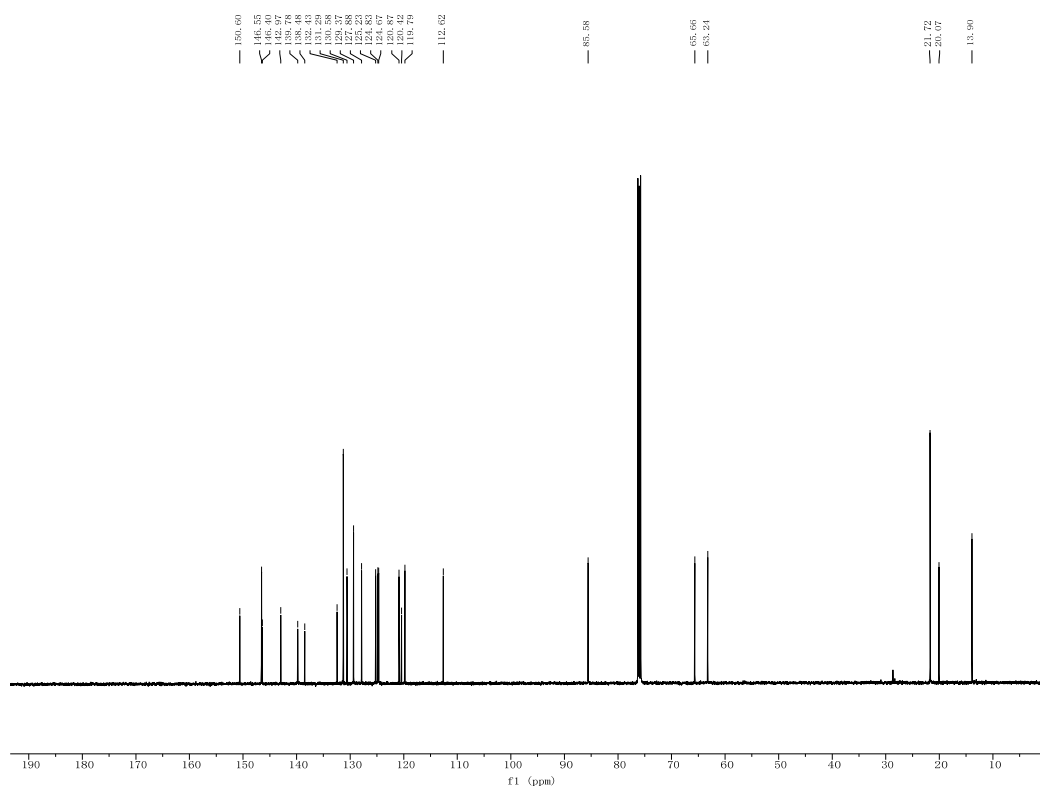

<sup>1</sup>H NMR spectrum (500 MHz, CDCl<sub>3</sub>)

7.85, 7.83, 7.82, 7.81, 7.79, 7.77, 7.76, 7.75, 7.74, 7.73, 7.72, 7.71, 7.70, 7.69, 7.68, 7.67, 7.66, 7.65, 7.64, 7.63, 7.62, 7.61, 7.60, 7.59, 7.58, 7.57, 7.56, 7.55, 7.54, 7.53, 7.52, 7.51, 7.50, 7.49, 7.48, 7.47, 7.46, 7.45, 7.44, 7.43, 7.42, 7.41, 7.40, 7.39, 7.38, 7.37, 7.36, 7.35, 7.34, 7.33, 7.32, 7.31, 7.30, 7.29, 7.28, 7.27, 7.26, 7.25, 7.24, 7.23, 7.22, 7.21, 7.20, 7.19, 7.18, 7.17, 7.16, 7.15, 7.14, 7.13, 7.12, 7.11, 7.10, 7.09, 7.08, 7.07, 7.06, 7.05, 7.04, 7.03, 7.02, 7.01, 7.00, 6.99, 6.98, 6.97, 6.96, 6.95, 6.94, 6.93, 6.92, 6.91, 6.90, 6.89, 6.88, 6.87, 6.86, 6.85, 6.84, 6.83, 6.82, 6.81, 6.80, 6.79, 6.78, 6.77, 6.76, 6.75, 6.74, 6.73, 6.72, 6.71, 6.70, 6.69, 6.68, 6.67, 6.66, 6.65, 6.64, 6.63, 6.62, 6.61, 6.60, 6.59, 6.58, 6.57, 6.56, 6.55, 6.54, 6.53, 6.52, 6.51, 6.50, 6.49, 6.48, 6.47, 6.46, 6.45, 6.44, 6.43, 6.42, 6.41, 6.40, 6.39, 6.38, 6.37, 6.36, 6.35, 6.34, 6.33, 6.32, 6.31, 6.30, 6.29, 6.28, 6.27, 6.26, 6.25, 6.24, 6.23, 6.22, 6.21, 6.20, 6.19, 6.18, 6.17, 6.16, 6.15, 6.14, 6.13, 6.12, 6.11, 6.10, 6.09, 6.08, 6.07, 6.06, 6.05, 6.04, 6.03, 6.02, 6.01, 6.00, 5.99, 5.98, 5.97, 5.96, 5.95, 5.94, 5.93, 5.92, 5.91, 5.90, 5.89, 5.88, 5.87, 5.86, 5.85, 5.84, 5.83, 5.82, 5.81, 5.80, 5.79, 5.78, 5.77, 5.76, 5.75, 5.74, 5.73, 5.72, 5.71, 5.70, 5.69, 5.68, 5.67, 5.66, 5.65, 5.64, 5.63, 5.62, 5.61, 5.60, 5.59, 5.58, 5.57, 5.56, 5.55, 5.54, 5.53, 5.52, 5.51, 5.50, 5.49, 5.48, 5.47, 5.46, 5.45, 5.44, 5.43, 5.42, 5.41, 5.40, 5.39, 5.38, 5.37, 5.36, 5.35, 5.34, 5.33, 5.32, 5.31, 5.30, 5.29, 5.28, 5.27, 5.26, 5.25, 5.24, 5.23, 5.22, 5.21, 5.20, 5.19, 5.18, 5.17, 5.16, 5.15, 5.14, 5.13, 5.12, 5.11, 5.10, 5.09, 5.08, 5.07, 5.06, 5.05, 5.04, 5.03, 5.02, 5.01, 5.00, 4.99, 4.98, 4.97, 4.96, 4.95, 4.94, 4.93, 4.92, 4.91, 4.90, 4.89, 4.88, 4.87, 4.86, 4.85, 4.84, 4.83, 4.82, 4.81, 4.80, 4.79, 4.78, 4.77, 4.76, 4.75, 4.74, 4.73, 4.72, 4.71, 4.70, 4.69, 4.68, 4.67, 4.66, 4.65, 4.64, 4.63, 4.62, 4.61, 4.60, 4.59, 4.58, 4.57, 4.56, 4.55, 4.54, 4.53, 4.52, 4.51, 4.50, 4.49, 4.48, 4.47, 4.46, 4.45, 4.44, 4.43, 4.42, 4.41, 4.40, 4.39, 4.38, 4.37, 4.36, 4.35, 4.34, 4.33, 4.32, 4.31, 4.30, 4.29, 4.28, 4.27, 4.26, 4.25, 4.24, 4.23, 4.22, 4.21, 4.20, 4.19, 4.18, 4.17, 4.16, 4.15, 4.14, 4.13, 4.12, 4.11, 4.10, 4.09, 4.08, 4.07, 4.06, 4.05, 4.04, 4.03, 4.02, 4.01, 4.00, 3.99, 3.98, 3.97, 3.96, 3.95, 3.94, 3.93, 3.92, 3.91, 3.90, 3.89, 3.88, 3.87, 3.86, 3.85, 3.84, 3.83, 3.82, 3.81, 3.80, 3.79, 3.78, 3.77, 3.76, 3.75, 3.74, 3.73, 3.72, 3.71, 3.70, 3.69, 3.68, 3.67, 3.66, 3.65, 3.64, 3.63, 3.62, 3.61, 3.60, 3.59, 3.58, 3.57, 3.56, 3.55, 3.54, 3.53, 3.52, 3.51, 3.50, 3.49, 3.48, 3.47, 3.46, 3.45, 3.44, 3.43, 3.42, 3.41, 3.40, 3.39, 3.38, 3.37, 3.36, 3.35, 3.34, 3.33, 3.32, 3.31, 3.30, 3.29, 3.28, 3.27, 3.26, 3.25, 3.24, 3.23, 3.22, 3.21, 3.20, 3.19, 3.18, 3.17, 3.16, 3.15, 3.14, 3.13, 3.12, 3.11, 3.10, 3.09, 3.08, 3.07, 3.06, 3.05, 3.04, 3.03, 3.02, 3.01, 3.00, 2.99, 2.98, 2.97, 2.96, 2.95, 2.94, 2.93, 2.92, 2.91, 2.90, 2.89, 2.88, 2.87, 2.86, 2.85, 2.84, 2.83, 2.82, 2.81, 2.80, 2.79, 2.78, 2.77, 2.76, 2.75, 2.74, 2.73, 2.72, 2.71, 2.70, 2.69, 2.68, 2.67, 2.66, 2.65, 2.64, 2.63, 2.62, 2.61, 2.60, 2.59, 2.58, 2.57, 2.56, 2.55, 2.54, 2.53, 2.52, 2.51, 2.50, 2.49, 2.48, 2.47, 2.46, 2.45, 2.44, 2.43, 2.42, 2.41, 2.40, 2.39, 2.38, 2.37, 2.36, 2.35, 2.34, 2.33, 2.32, 2.31, 2.30, 2.29, 2.28, 2.27, 2.26, 2.25, 2.24, 2.23, 2.22, 2.21, 2.20, 2.19, 2.18, 2.17, 2.16, 2.15, 2.14, 2.13, 2.12, 2.11, 2.10, 2.09, 2.08, 2.07, 2.06, 2.05, 2.04, 2.03, 2.02, 2.01, 2.00, 1.99, 1.98, 1.97, 1.96, 1.95, 1.94, 1.93, 1.92, 1.91, 1.90, 1.89, 1.88, 1.87, 1.86, 1.85, 1.84, 1.83, 1.82, 1.81, 1.80, 1.79, 1.78, 1.77, 1.76, 1.75, 1.74, 1.73, 1.72, 1.71, 1.70, 1.69, 1.68, 1.67, 1.66, 1.65, 1.64, 1.63, 1.62, 1.61, 1.60, 1.59, 1.58, 1.57, 1.56, 1.55, 1.54, 1.53, 1.52, 1.51, 1.50, 1.49, 1.48, 1.47, 1.46, 1.45, 1.44, 1.43, 1.42, 1.41, 1.40, 1.39, 1.38, 1.37, 1.36, 1.35, 1.34, 1.33, 1.32, 1.31, 1.30, 1.29, 1.28, 1.27, 1.26, 1.25, 1.24, 1.23, 1.22, 1.21, 1.20, 1.19, 1.18, 1.17, 1.16, 1.15, 1.14, 1.13, 1.12, 1.11, 1.10, 1.09, 1.08, 1.07, 1.06, 1.05, 1.04, 1.03, 1.02, 1.01, 1.00, 0.99, 0.98, 0.97, 0.96, 0.95, 0.94, 0.93, 0.92, 0.91, 0.90, 0.89, 0.88, 0.87, 0.86, 0.85, 0.84, 0.83, 0.82, 0.81, 0.80, 0.79, 0.78, 0.77, 0.76, 0.75, 0.74, 0.73, 0.72, 0.71, 0.70, 0.69, 0.68, 0.67, 0.66, 0.65, 0.64, 0.63, 0.62, 0.61, 0.60, 0.59, 0.58, 0.57, 0.56, 0.55, 0.54, 0.53, 0.52, 0.51, 0.50, 0.49, 0.48, 0.47, 0.46, 0.45, 0.44, 0.43, 0.42, 0.41, 0.40, 0.39, 0.38, 0.37, 0.36, 0.35, 0.34, 0.33, 0.32, 0.31, 0.30, 0.29, 0.28, 0.27, 0.26, 0.25, 0.24, 0.23, 0.22, 0.21, 0.20, 0.19, 0.18, 0.17, 0.16, 0.15, 0.14, 0.13, 0.12, 0.11, 0.10, 0.09, 0.08, 0.07, 0.06, 0.05, 0.04, 0.03, 0.02, 0.01, 0.00

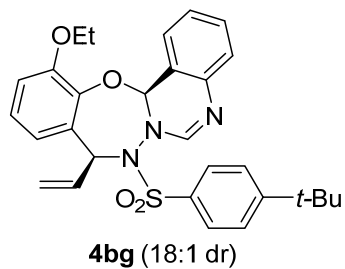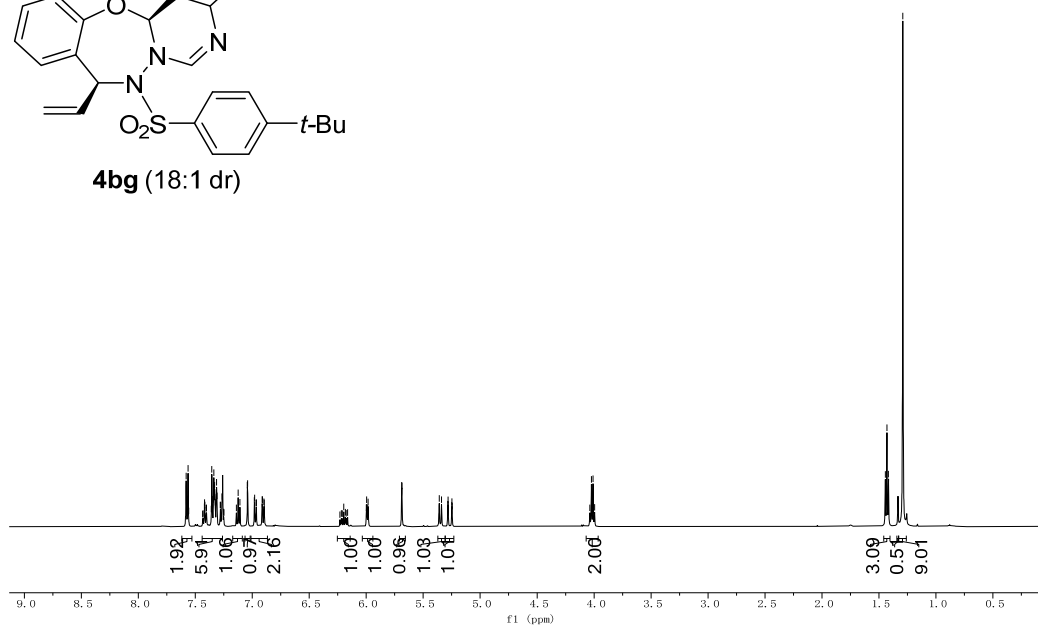

<sup>13</sup>C NMR spectrum (126 MHz, CDCl<sub>3</sub>)

157.97, 151.88, 147.33, 139.77, 134.83, 134.83, 134.85, 130.46, 128.03, 126.13, 126.04, 125.12, 122.12, 121.28, 118.64, 86.87, 67.64, 64.30, 35.24, 30.99, 14.86

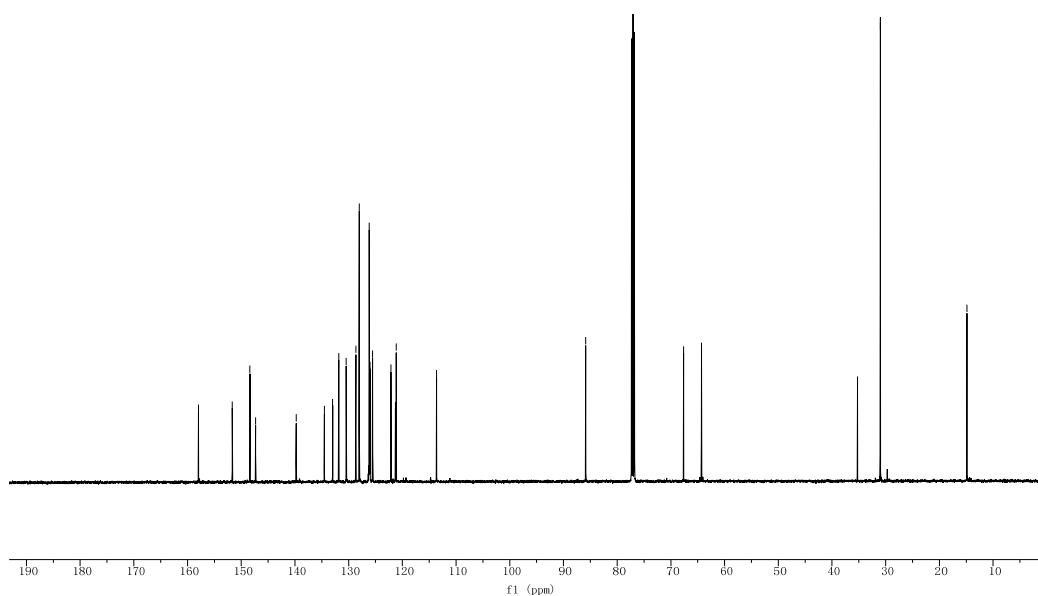

<sup>1</sup>H NMR spectrum (500 MHz, CDCl<sub>3</sub>)

7.87, 7.85, 7.83, 7.81, 7.79, 7.77, 7.75, 7.73, 7.71, 7.69, 7.67, 7.65, 7.63, 7.61, 7.59, 7.57, 7.55, 7.53, 7.51, 7.49, 7.47, 7.45, 7.43, 7.41, 7.39, 7.37, 7.35, 7.33, 7.31, 7.29, 7.27, 7.25, 7.23, 7.21, 7.19, 7.17, 7.15, 7.13, 7.11, 7.09, 7.07, 7.05, 7.03, 7.01, 6.99, 6.97, 6.95, 6.93, 6.91, 6.89, 6.87, 6.85, 6.83, 6.81, 6.79, 6.77, 6.75, 6.73, 6.71, 6.69, 6.67, 6.65, 6.63, 6.61, 6.59, 6.57, 6.55, 6.53, 6.51, 6.49, 6.47, 6.45, 6.43, 6.41, 6.39, 6.37, 6.35, 6.33, 6.31, 6.29, 6.27, 6.25, 6.23, 6.21, 6.19, 6.17, 6.15, 6.13, 6.11, 6.09, 6.07, 6.05, 6.03, 6.01, 5.99, 5.97, 5.95, 5.93, 5.91, 5.89, 5.87, 5.85, 5.83, 5.81, 5.79, 5.77, 5.75, 5.73, 5.71, 5.69, 5.67, 5.65, 5.63, 5.61, 5.59, 5.57, 5.55, 5.53, 5.51, 5.49, 5.47, 5.45, 5.43, 5.41, 5.39, 5.37, 5.35, 5.33, 5.31, 5.29, 5.27, 5.25, 5.23, 5.21, 5.19, 5.17, 5.15, 5.13, 5.11, 5.09, 5.07, 5.05, 5.03, 5.01, 4.99, 4.97, 4.95, 4.93, 4.91, 4.89, 4.87, 4.85, 4.83, 4.81, 4.79, 4.77, 4.75, 4.73, 4.71, 4.69, 4.67, 4.65, 4.63, 4.61, 4.59, 4.57, 4.55, 4.53, 4.51, 4.49, 4.47, 4.45, 4.43, 4.41, 4.39, 4.37, 4.35, 4.33, 4.31, 4.29, 4.27, 4.25, 4.23, 4.21, 4.19, 4.17, 4.15, 4.13, 4.11, 4.09, 4.07, 4.05, 4.03, 4.01, 3.99, 3.97, 3.95, 3.93, 3.91, 3.89, 3.87, 3.85, 3.83, 3.81, 3.79, 3.77, 3.75, 3.73, 3.71, 3.69, 3.67, 3.65, 3.63, 3.61, 3.59, 3.57, 3.55, 3.53, 3.51, 3.49, 3.47, 3.45, 3.43, 3.41, 3.39, 3.37, 3.35, 3.33, 3.31, 3.29, 3.27, 3.25, 3.23, 3.21, 3.19, 3.17, 3.15, 3.13, 3.11, 3.09, 3.07, 3.05, 3.03, 3.01, 2.99, 2.97, 2.95, 2.93, 2.91, 2.89, 2.87, 2.85, 2.83, 2.81, 2.79, 2.77, 2.75, 2.73, 2.71, 2.69, 2.67, 2.65, 2.63, 2.61, 2.59, 2.57, 2.55, 2.53, 2.51, 2.49, 2.47, 2.45, 2.43, 2.41, 2.39, 2.37, 2.35, 2.33, 2.31, 2.29, 2.27, 2.25, 2.23, 2.21, 2.19, 2.17, 2.15, 2.13, 2.11, 2.09, 2.07, 2.05, 2.03, 2.01, 1.99, 1.97, 1.95, 1.93, 1.91, 1.89, 1.87, 1.85, 1.83, 1.81, 1.79, 1.77, 1.75, 1.73, 1.71, 1.69, 1.67, 1.65, 1.63, 1.61, 1.59, 1.57, 1.55, 1.53, 1.51, 1.49, 1.47, 1.45, 1.43, 1.41, 1.39, 1.37, 1.35, 1.33, 1.31, 1.29, 1.27, 1.25, 1.23, 1.21, 1.19, 1.17, 1.15, 1.13, 1.11, 1.09, 1.07, 1.05, 1.03, 1.01, 0.99, 0.97, 0.95, 0.93, 0.91, 0.89, 0.87, 0.85, 0.83, 0.81, 0.79, 0.77, 0.75, 0.73, 0.71, 0.69, 0.67, 0.65, 0.63, 0.61, 0.59, 0.57, 0.55, 0.53, 0.51, 0.49, 0.47, 0.45, 0.43, 0.41, 0.39, 0.37, 0.35, 0.33, 0.31, 0.29, 0.27, 0.25, 0.23, 0.21, 0.19, 0.17, 0.15, 0.13, 0.11, 0.09, 0.07, 0.05, 0.03, 0.01, 1.39, 1.38, 1.36

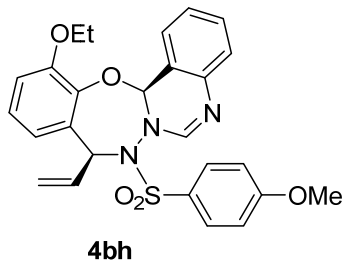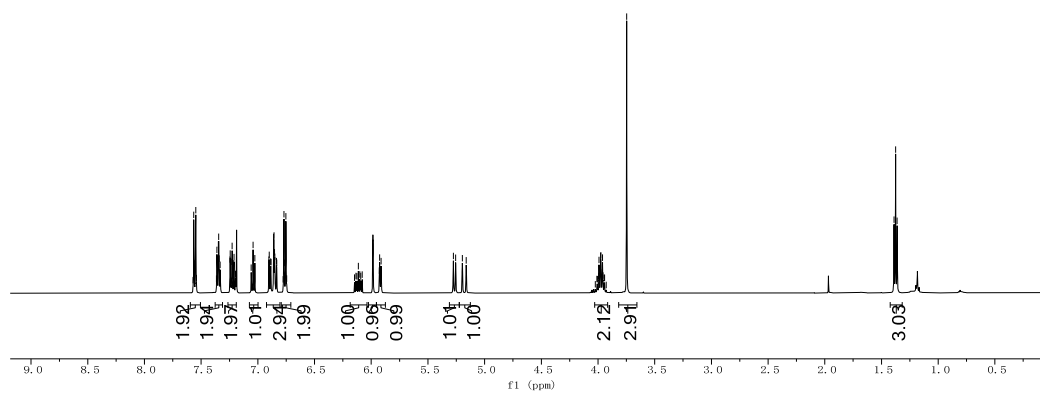

<sup>13</sup>C NMR spectrum (126 MHz, CDCl<sub>3</sub>)

162.80, 150.60, 146.37, 138.69, 132.03, 129.42, 127.79, 125.13, 124.90, 120.95, 120.03, 113.43, 112.83, 85.02, 66.25, 63.35, 54.65, 13.84

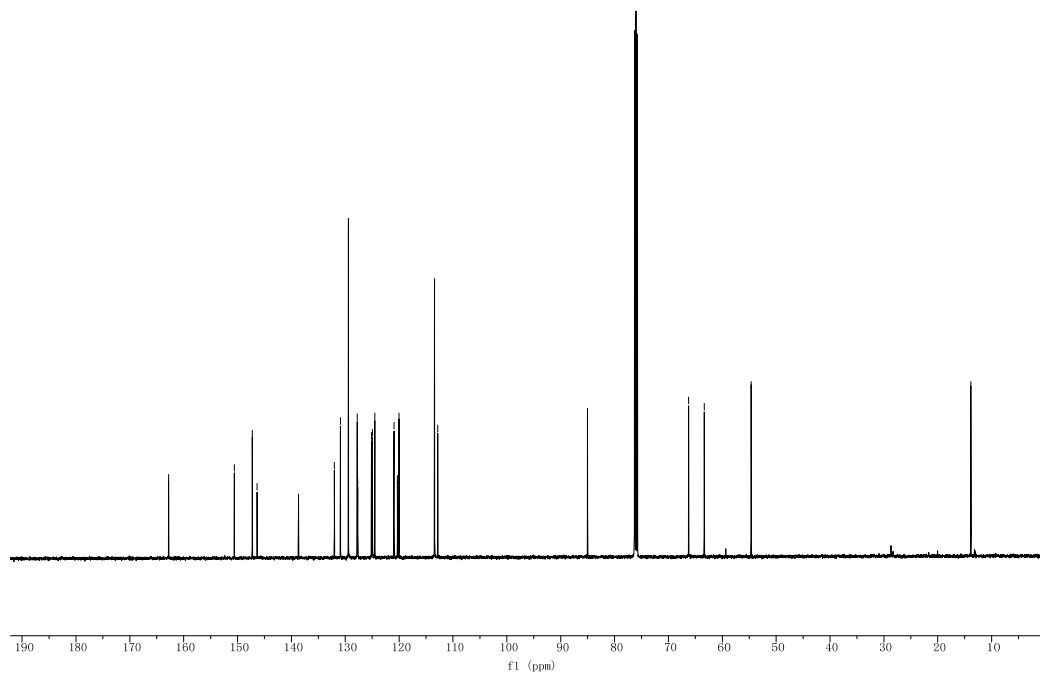

<sup>1</sup>H NMR spectrum (500 MHz, CDCl<sub>3</sub>)

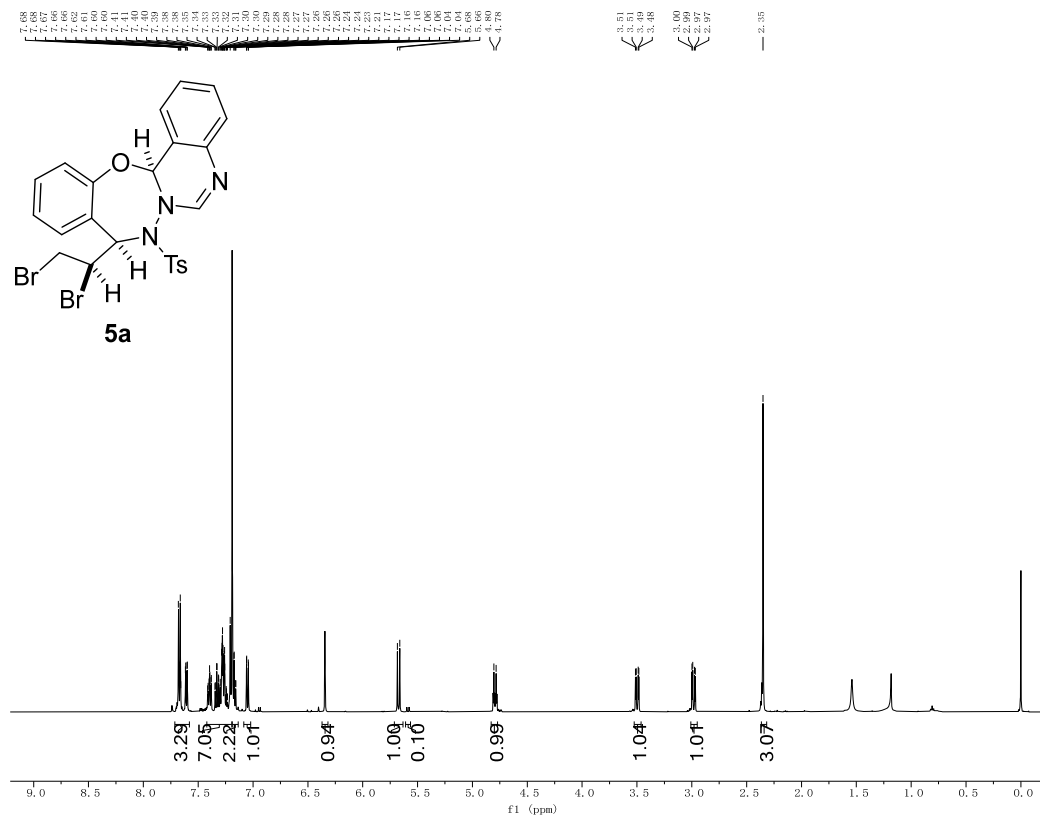

<sup>13</sup>C NMR spectrum (126 MHz, CDCl<sub>3</sub>)

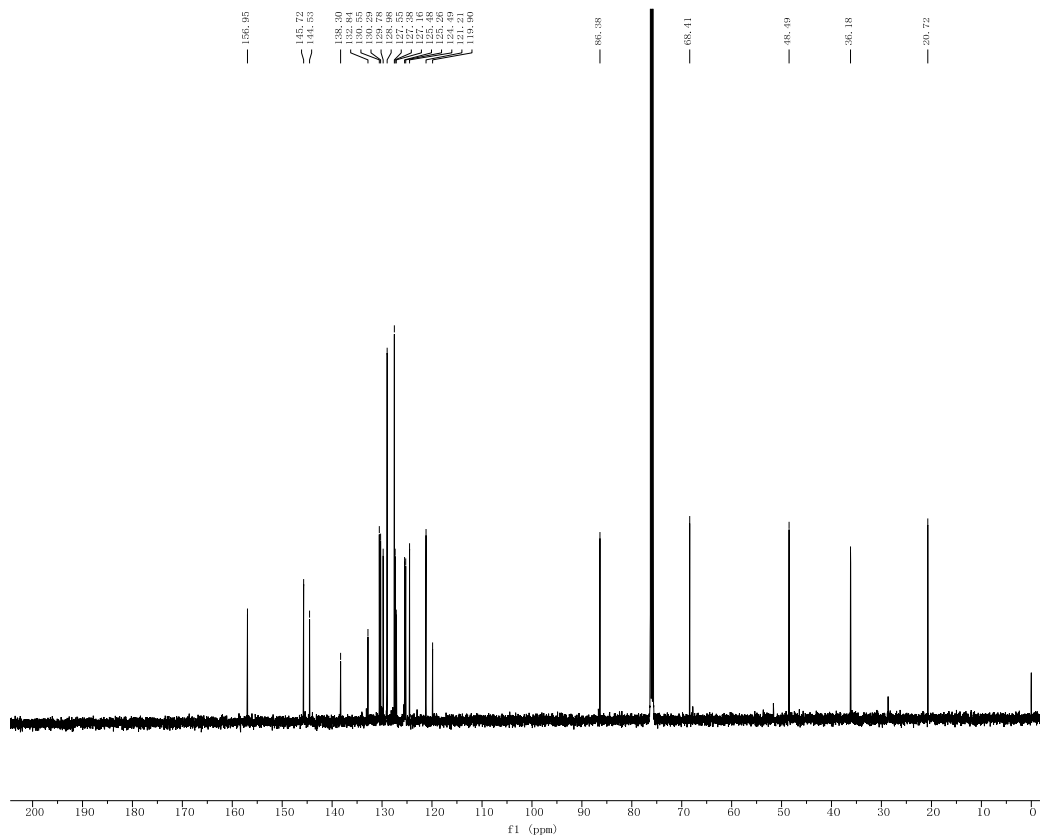

<sup>1</sup>H NMR spectrum (500 MHz, CDCl<sub>3</sub>)

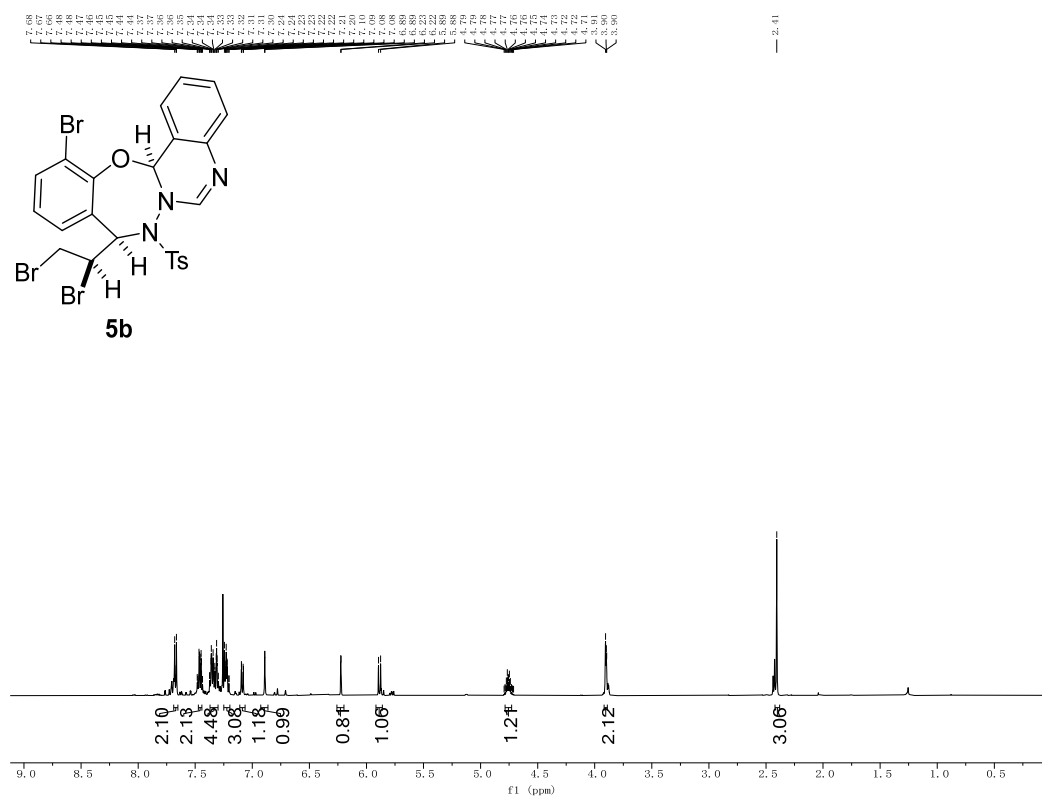

<sup>13</sup>C NMR spectrum (126 MHz, CDCl<sub>3</sub>)

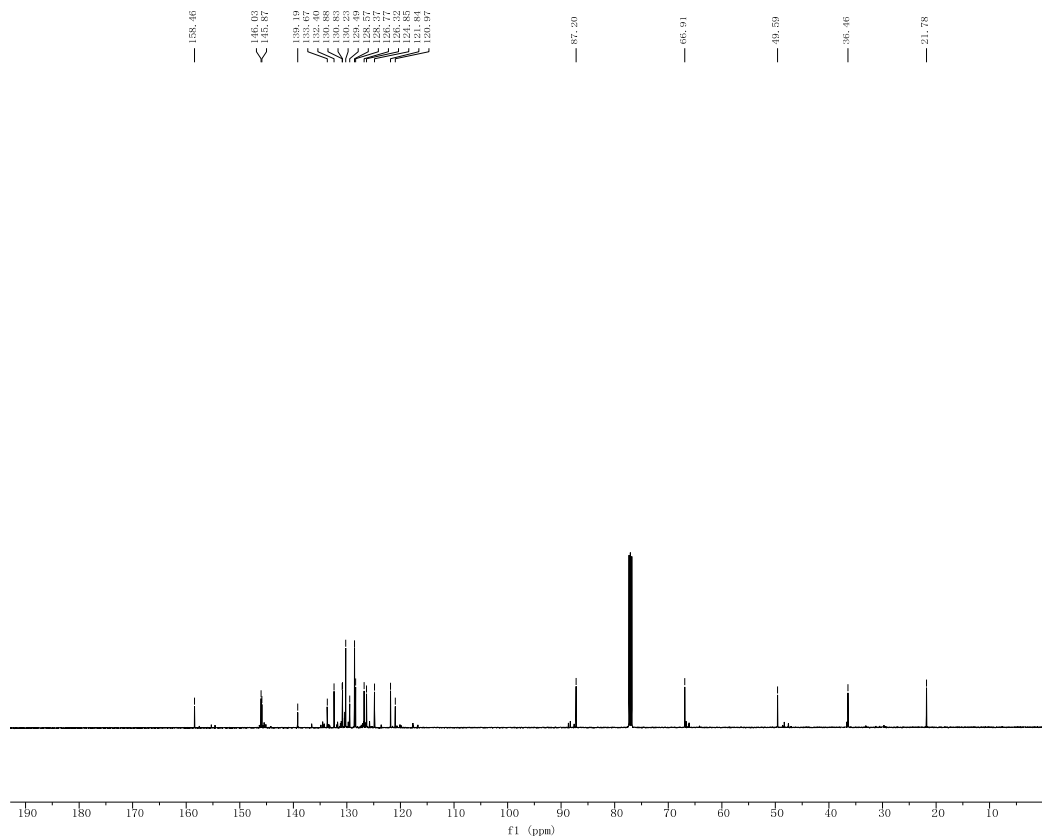

<sup>1</sup>H NMR spectrum (500 MHz, DMSO-*d*<sub>6</sub>)

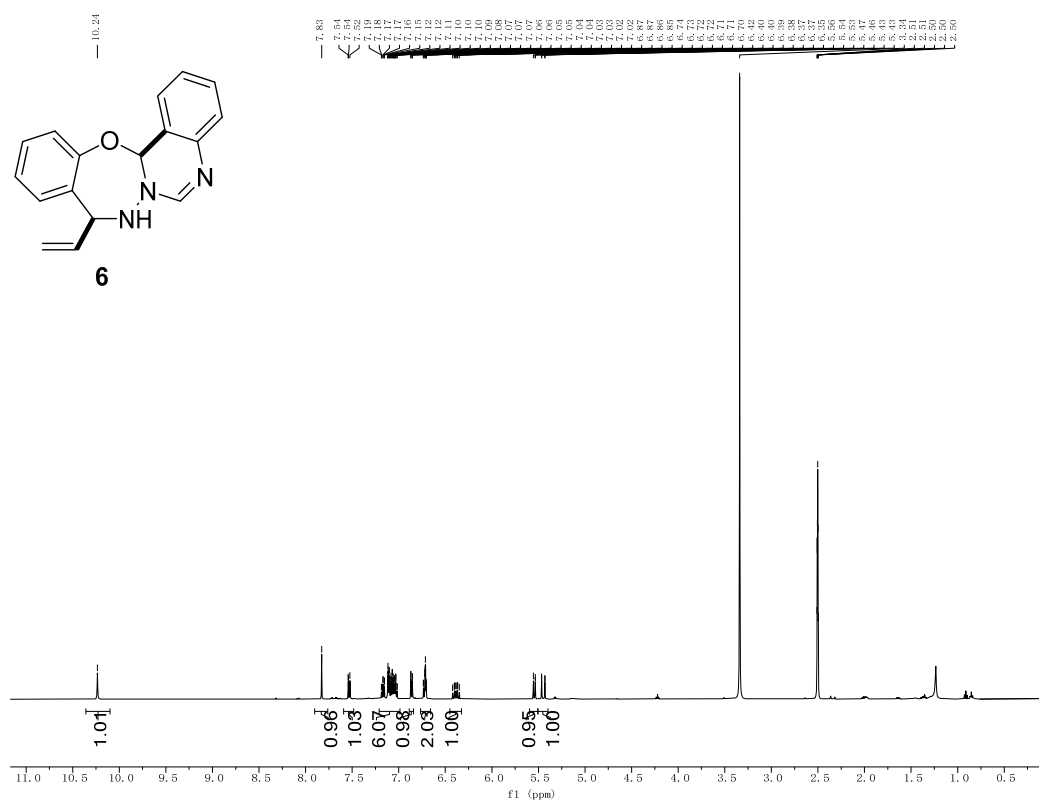

<sup>13</sup>C NMR spectrum (126 MHz, DMSO-*d*<sub>6</sub>)

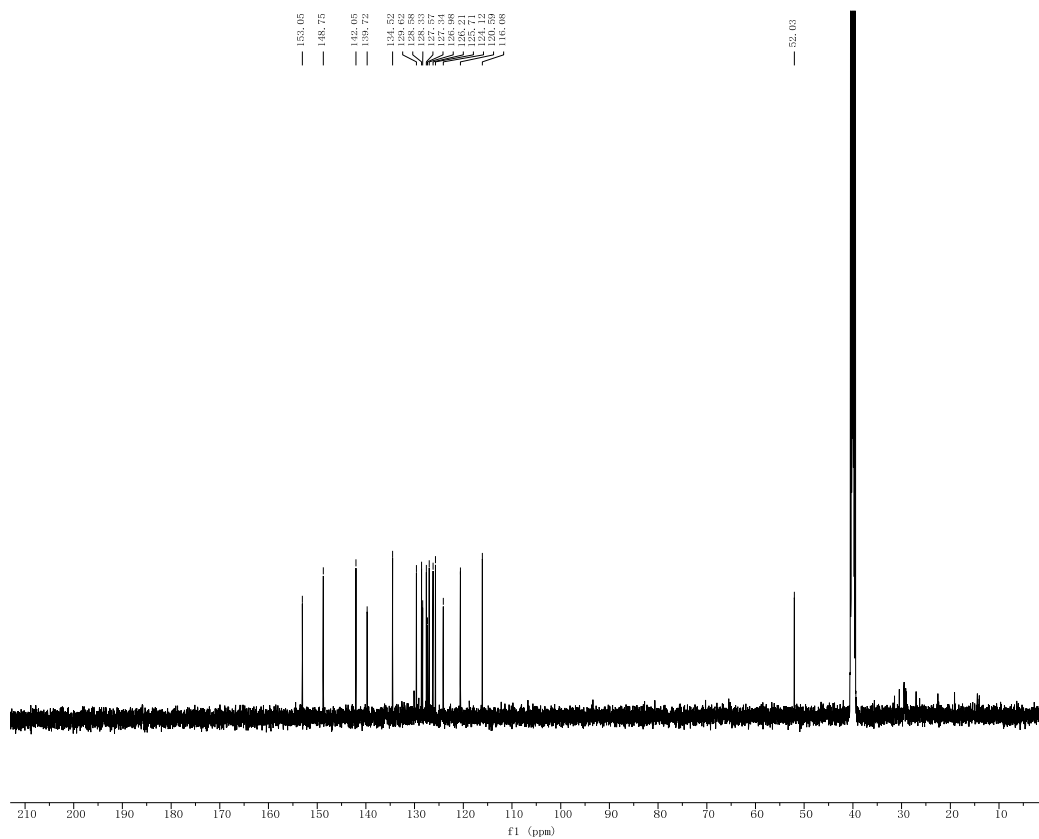

## HPLC Chromatograms of All Products

HPLC chromatogram of racemic product **3aa**

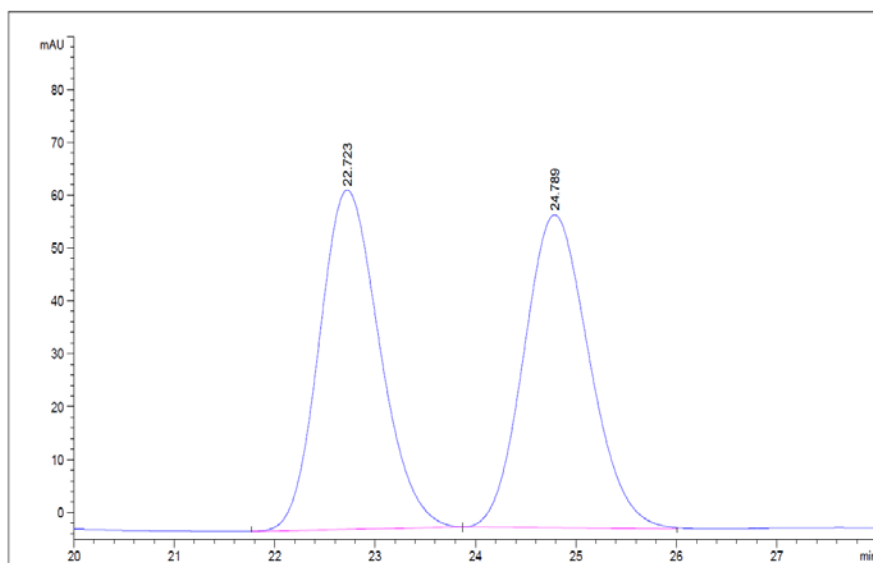

| Peak # | RetTime [min] | Type | Width [min] | Area [mAU*s] | Height [mAU] | Area %  |
|--------|---------------|------|-------------|--------------|--------------|---------|
| 1      | 22.723        | BB   | 0.6479      | 2678.49487   | 64.17604     | 50.0655 |
| 2      | 24.789        | MF R | 0.7523      | 2671.49121   | 59.18179     | 49.9345 |

HPLC chromatogram of chiral product **4aa**

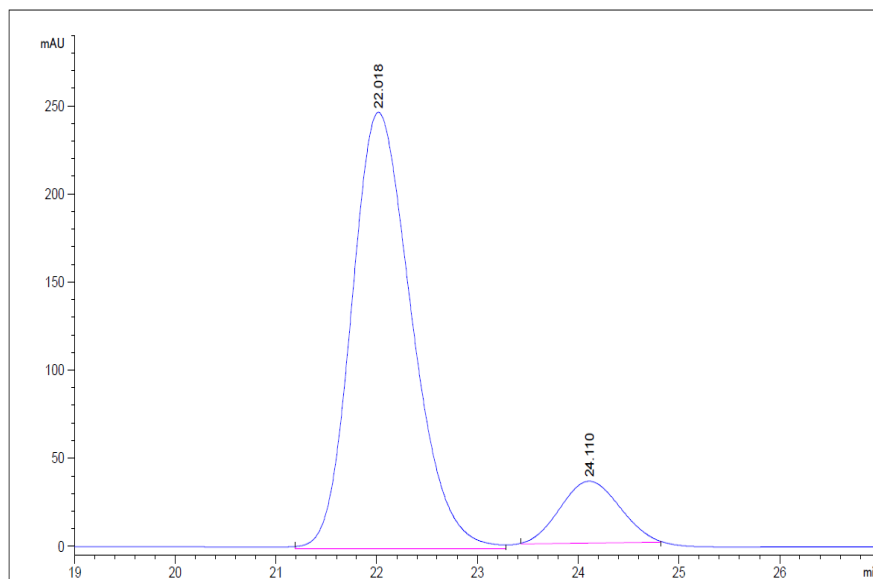

| Peak # | RetTime [min] | Type | Width [min] | Area [mAU*s] | Height [mAU] | Area %  |
|--------|---------------|------|-------------|--------------|--------------|---------|
| 1      | 22.018        | MM R | 0.6511      | 1.02281      | 247.74037    | 87.5946 |
| 2      | 24.110        | MM R | 0.6866      | 1448.53503   | 35.16076     | 12.4054 |

HPLC chromatogram of racemic product **3ba**

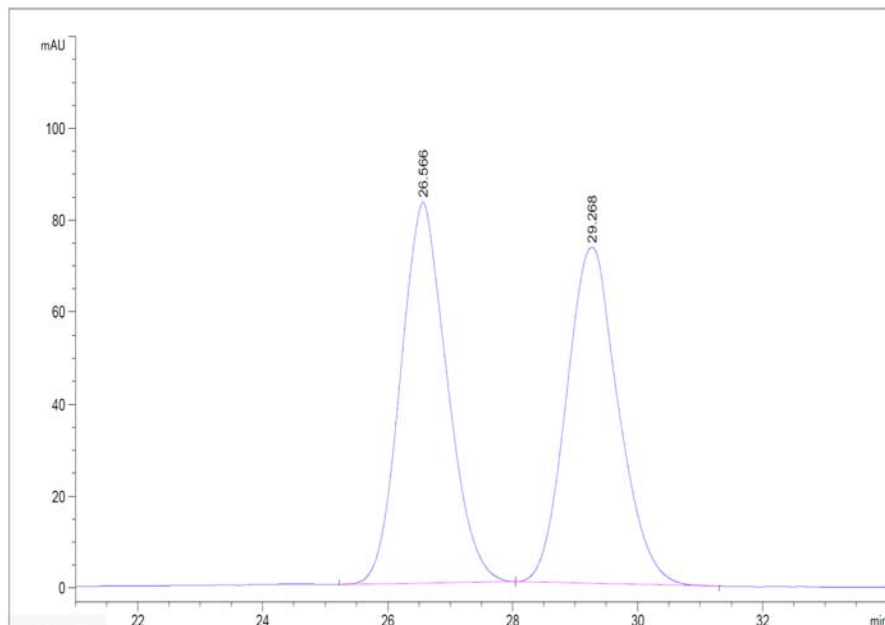

| Peak # | RetTime [min] | Type | Width [min] | Area [mAU*s] | Height [mAU] | Area %  |
|--------|---------------|------|-------------|--------------|--------------|---------|
| 1      | 26.566        | BB   | 0.8011      | 4265.23486   | 82.78930     | 50.2802 |
| 2      | 29.268        | BB   | 0.8624      | 4217.69141   | 73.07430     | 49.7198 |

HPLC chromatogram of chiral product **4ba**

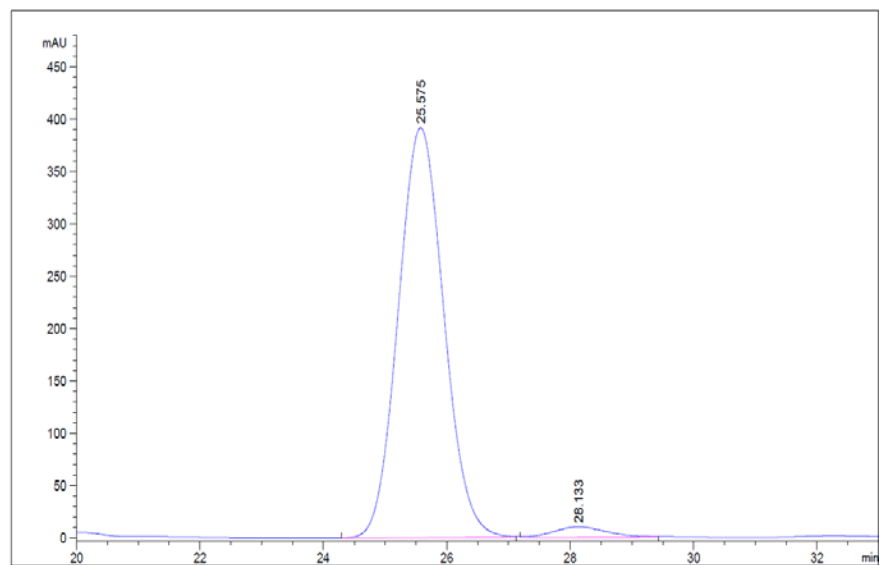

| Peak # | RetTime [min] | Type | Width [min] | Area [mAU*s] | Height [mAU] | Area %  |
|--------|---------------|------|-------------|--------------|--------------|---------|
| 1      | 25.575        | MM R | 0.8541      | 2.00571      | 391.37234    | 97.0873 |
| 2      | 28.133        | MM R | 1.0031      | 601.73303    | 9.99827      | 2.9127  |



HPLC chromatogram of racemic product **3ea**

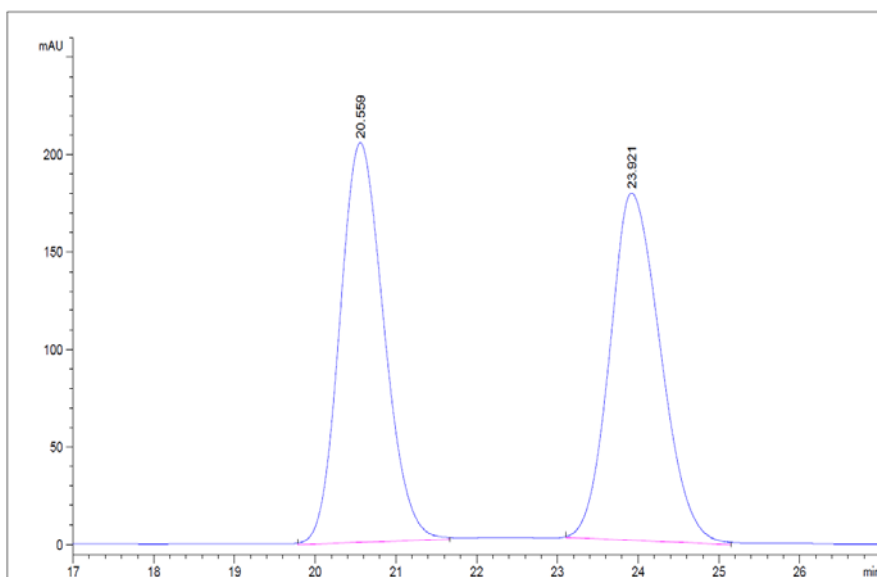

| Peak # | RetTime [min] | Type | Width [min] | Area [mAU*s] | Height [mAU] | Area %  |
|--------|---------------|------|-------------|--------------|--------------|---------|
| 1      | 20.559        | MM R | 0.6316      | 7766.18994   | 204.93684    | 49.9866 |
| 2      | 23.921        | MM R | 0.7271      | 7770.35352   | 178.10362    | 50.0134 |

HPLC chromatogram of chiral product **4ea**

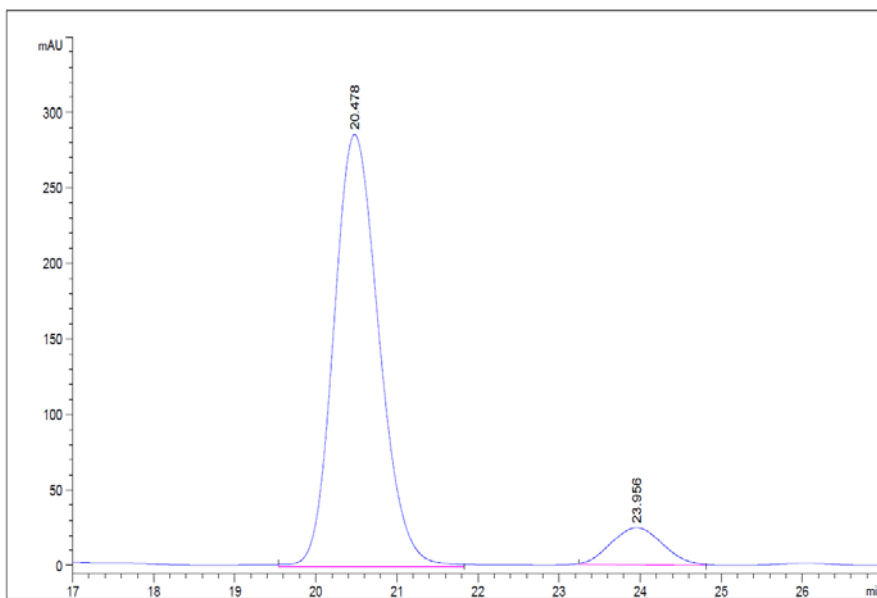

| Peak # | RetTime [min] | Type | Width [min] | Area [mAU*s] | Height [mAU] | Area %  |
|--------|---------------|------|-------------|--------------|--------------|---------|
| 1      | 20.478        | MM R | 0.6437      | 1.10426e4    | 285.93152    | 91.0105 |
| 2      | 23.956        | MM R | 0.7363      | 1090.72668   | 24.69032     | 8.9895  |

HPLC chromatogram of racemic product **4bb**

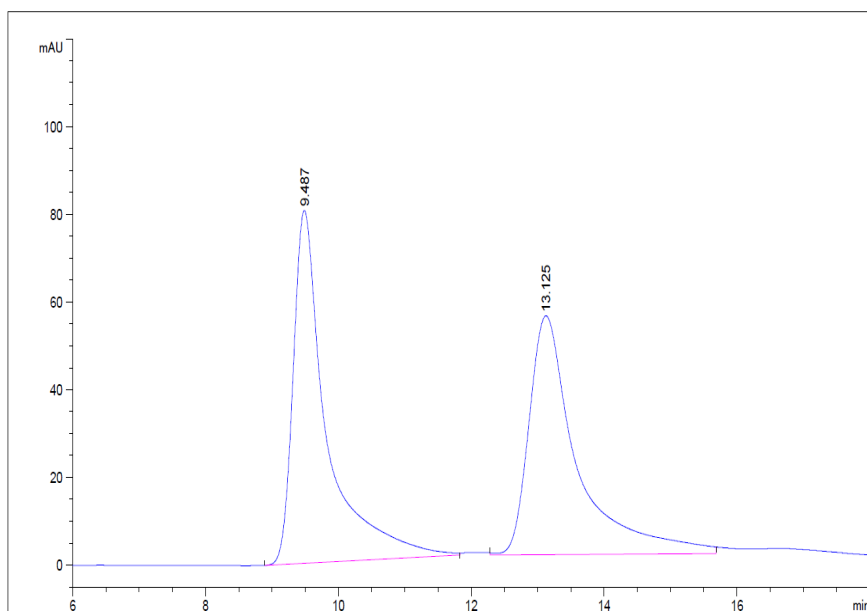

| Peak # | RetTime [min] | Type | Width [min] | Area [mAU*s] | Height [mAU] | Area %  |
|--------|---------------|------|-------------|--------------|--------------|---------|
| 1      | 9.487         | MM R | 0.5864      | 2832.74561   | 80.50751     | 50.7375 |
| 2      | 13.125        | MF R | 0.8418      | 2750.39478   | 54.45171     | 49.2625 |

HPLC chromatogram of chiral product **4bb**

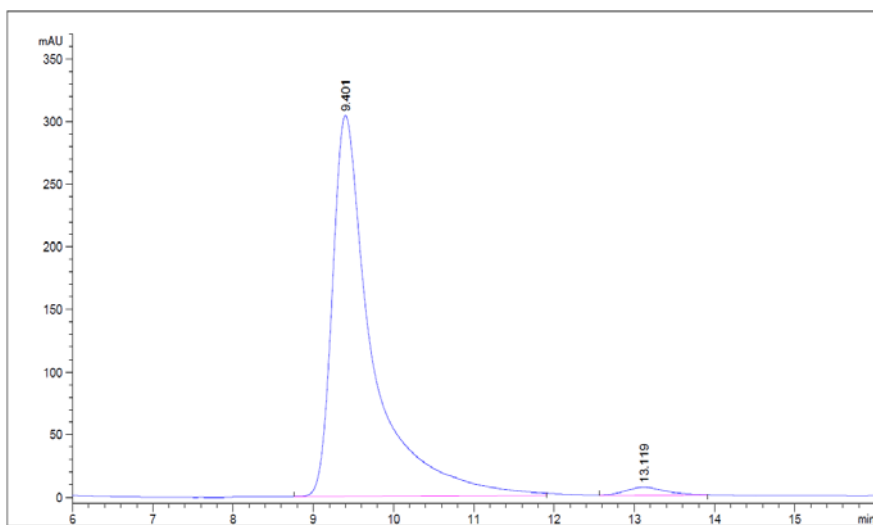

| Peak # | RetTime [min] | Type | Width [min] | Area [mAU*s] | Height [mAU] | Area %  |
|--------|---------------|------|-------------|--------------|--------------|---------|
| 1      | 9.401         | MF R | 0.5761      | 1.05173e4    | 304.28091    | 97.7340 |
| 2      | 13.119        | MM R | 0.5983      | 243.84918    | 6.79263      | 2.2660  |

HPLC chromatogram of racemic product **4bd**

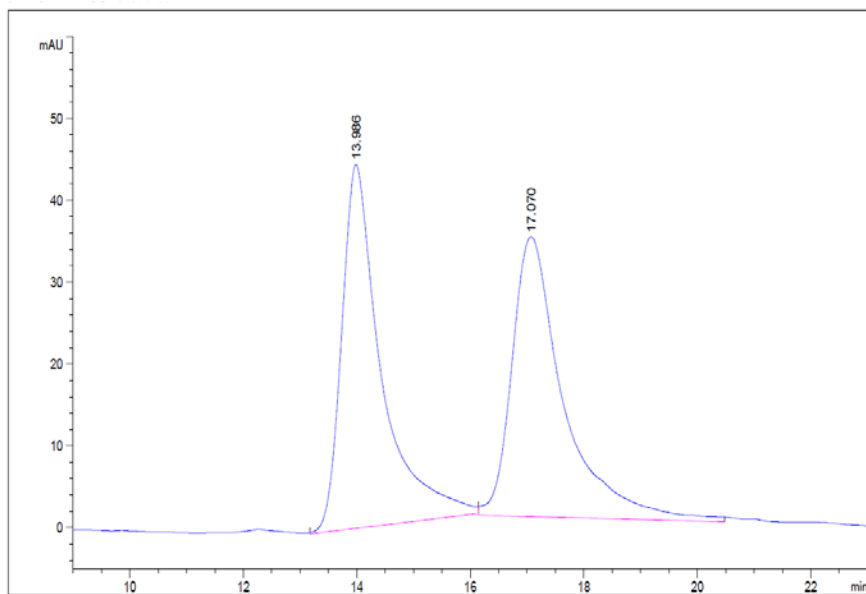

| Peak # | RetTime [min] | Type | Width [min] | Area [mAU*s] | Height [mAU] | Area %  |
|--------|---------------|------|-------------|--------------|--------------|---------|
| 1      | 13.986        | MM R | 0.8079      | 2156.36377   | 44.48328     | 50.1075 |
| 2      | 17.070        | MM R | 1.0479      | 2147.10791   | 34.14918     | 49.8925 |

HPLC chromatogram of chiral product **4bd**

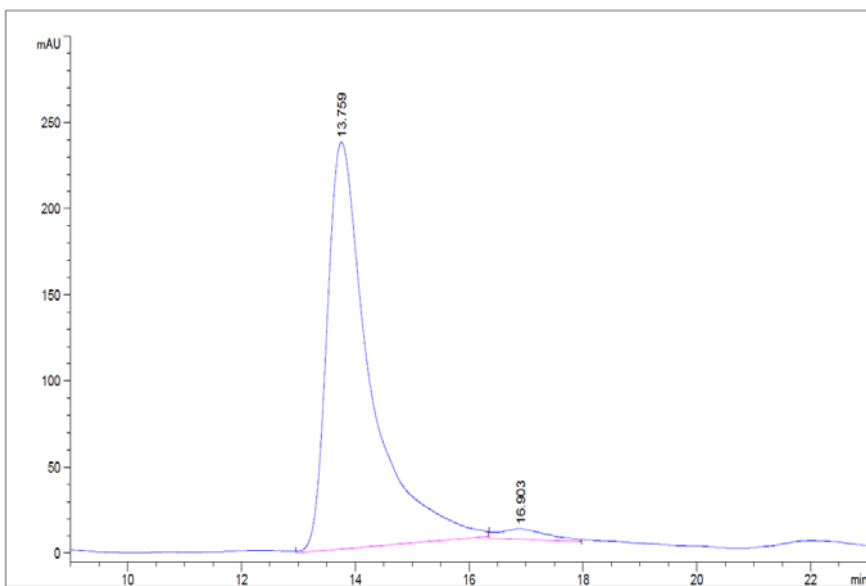

| Peak # | RetTime [min] | Type | Width [min] | Area [mAU*s] | Height [mAU] | Area %  |
|--------|---------------|------|-------------|--------------|--------------|---------|
| 1      | 13.759        | MM R | 0.8752      | 1.23932e4    | 236.01077    | 97.1160 |
| 2      | 16.903        | MM R | 0.9999      | 368.03125    | 6.13428      | 2.8840  |

HPLC chromatogram of racemic product **4be**

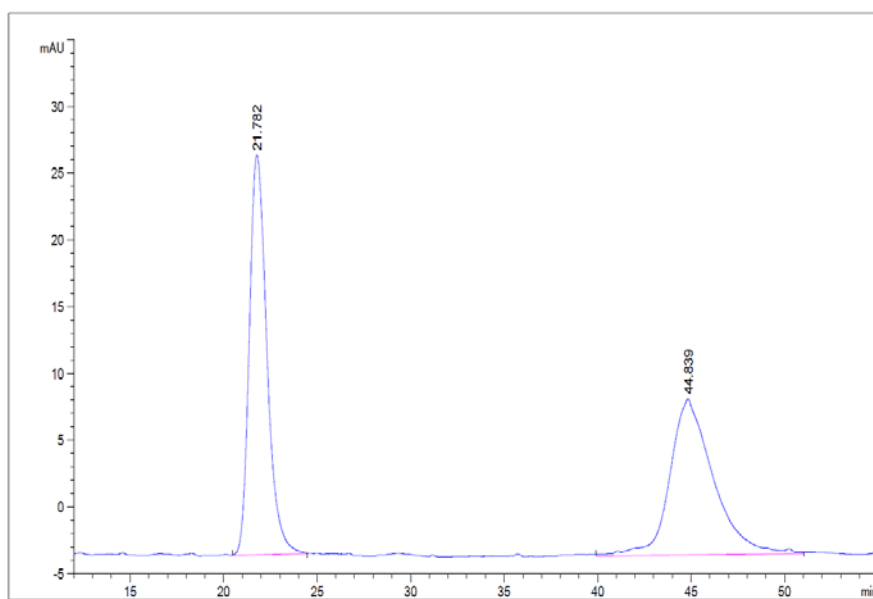

| Peak # | RetTime [min] | Type | Width [min] | Area [mAU*s] | Height [mAU] | Area %  |
|--------|---------------|------|-------------|--------------|--------------|---------|
| 1      | 21.782        | MM R | 1.0876      | 1956.32544   | 29.98030     | 50.7708 |
| 2      | 44.839        | MM R | 2.6998      | 1896.92639   | 11.71021     | 49.2292 |

HPLC chromatogram of chiral product **4be**

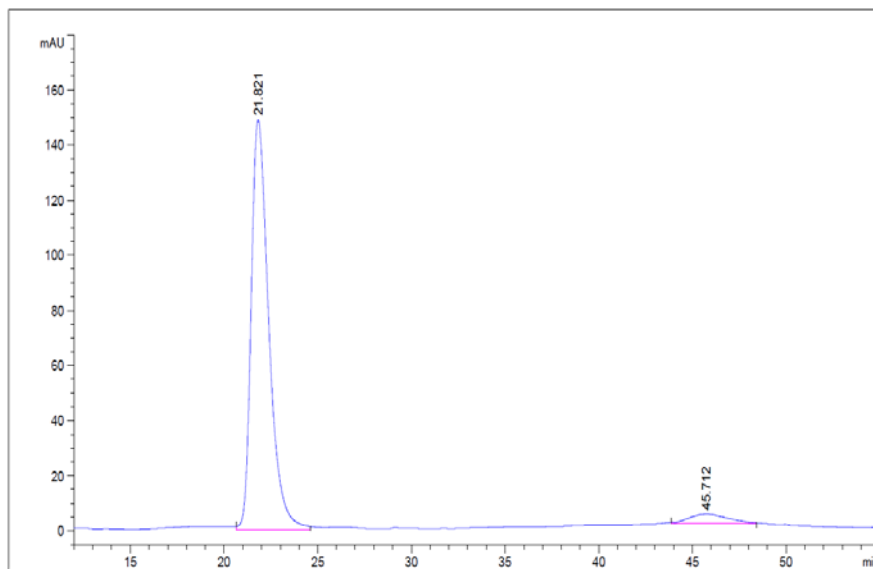

| Peak # | RetTime [min] | Type | Width [min] | Area [mAU*s] | Height [mAU] | Area %  |
|--------|---------------|------|-------------|--------------|--------------|---------|
| 1      | 21.821        | MM R | 1.0836      | 9664.59473   | 148.64738    | 95.0148 |
| 2      | 45.712        | MM R | 2.4580      | 507.08252    | 3.43827      | 4.9852  |

HPLC chromatogram of racemic product **4bf**

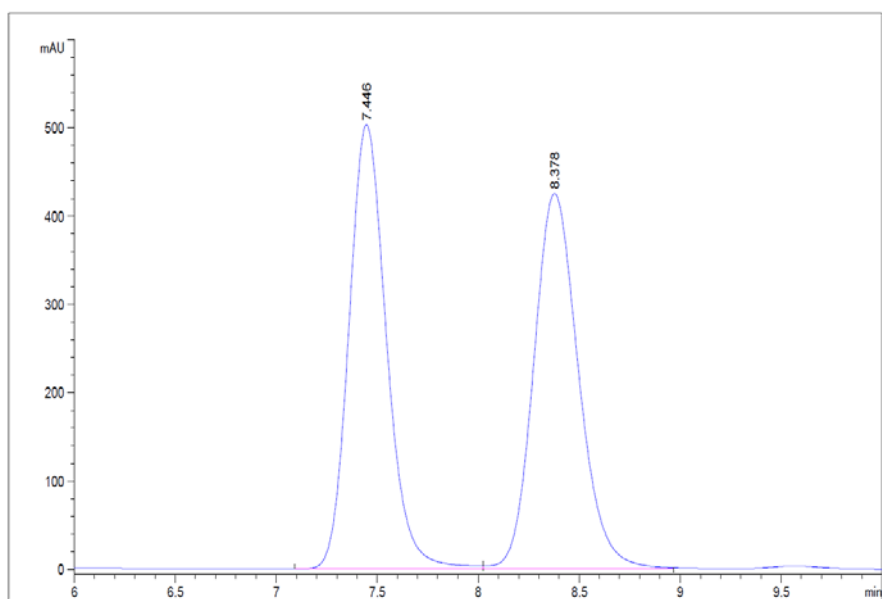

| Peak # | RetTime [min] | Type | Width [min] | Area [mAU*s] | Height [mAU] | Area %  |
|--------|---------------|------|-------------|--------------|--------------|---------|
| 1      | 7.446         | BV   | 0.1984      | 6475.07471   | 502.34210    | 49.7771 |
| 2      | 8.378         | MF R | 0.2563      | 6533.07764   | 424.82959    | 50.2229 |

HPLC chromatogram of chiral product **4bf**

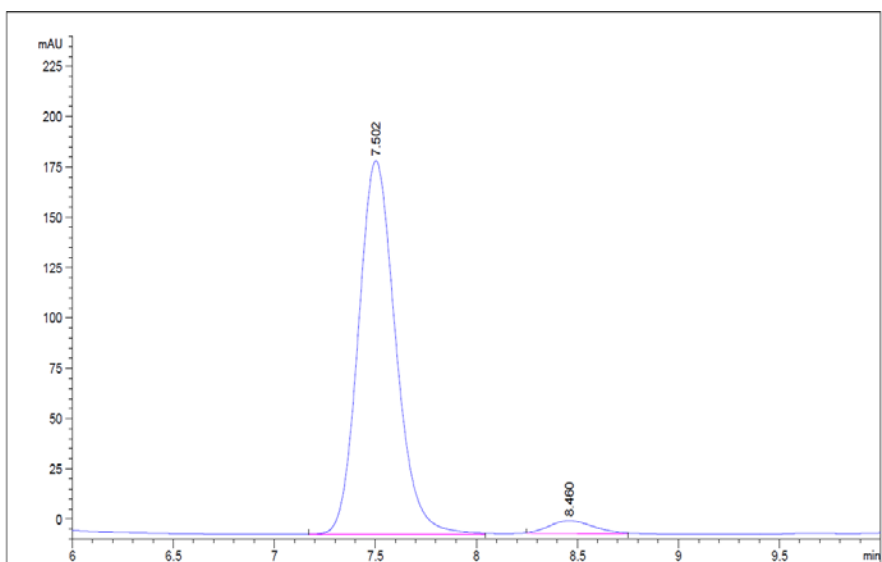

| Peak # | RetTime [min] | Type | Width [min] | Area [mAU*s] | Height [mAU] | Area %  |
|--------|---------------|------|-------------|--------------|--------------|---------|
| 1      | 7.502         | MM R | 0.2139      | 2387.36035   | 186.04926    | 96.0679 |
| 2      | 8.460         | MM R | 0.2549      | 97.71642     | 6.39007      | 3.9321  |

HPLC chromatogram of racemic product **4bg**

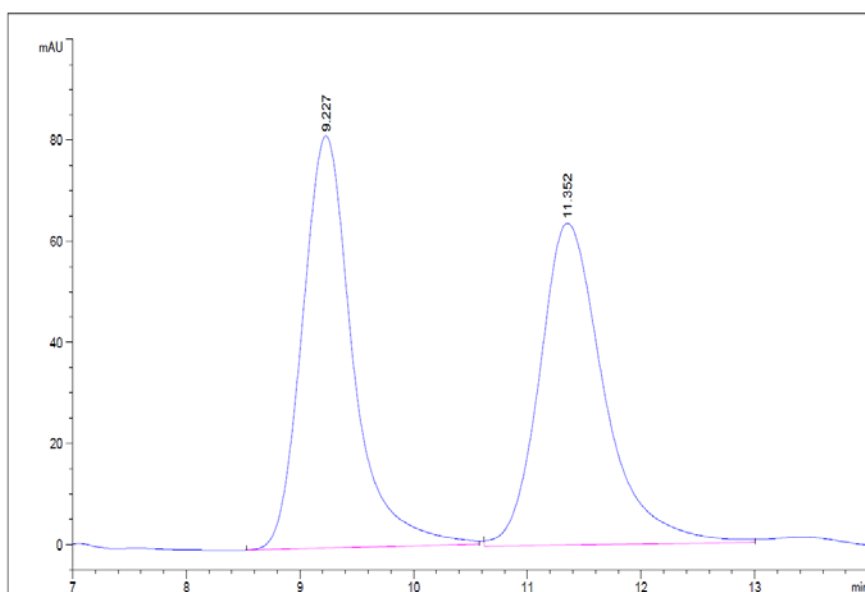

| Peak # | RetTime [min] | Type | Width [min] | Area [mAU*s] | Height [mAU] | Area %  |
|--------|---------------|------|-------------|--------------|--------------|---------|
| 1      | 9.227         | MM R | 0.5144      | 2516.26147   | 81.53439     | 50.0469 |
| 2      | 11.352        | MM R | 0.6569      | 2511.54663   | 63.72014     | 49.9531 |

HPLC chromatogram of chiral product **4bg**

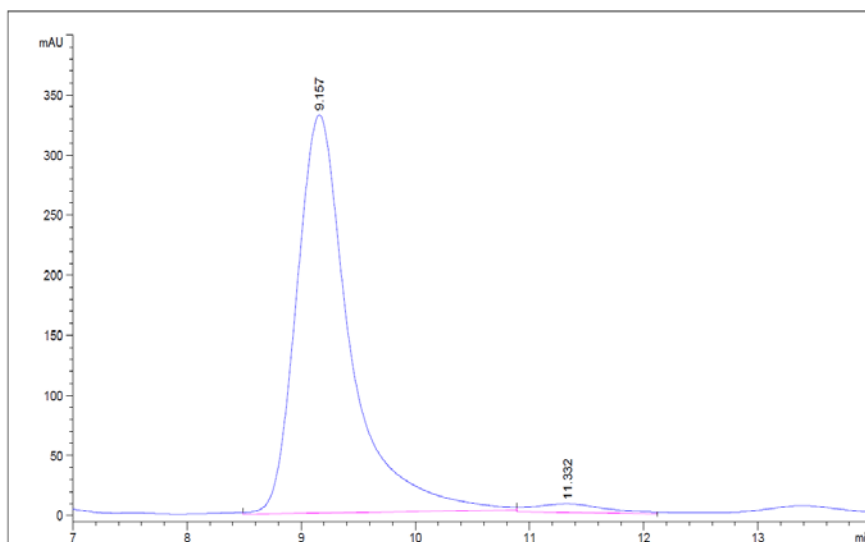

| Peak # | RetTime [min] | Type | Width [min] | Area [mAU*s] | Height [mAU] | Area %  |
|--------|---------------|------|-------------|--------------|--------------|---------|
| 1      | 9.157         | MM R | 0.5423      | 1.07812e4    | 331.33960    | 97.1263 |
| 2      | 11.332        | MM R | 0.7347      | 318.98666    | 7.23658      | 2.8737  |

HPLC chromatogram of racemic product **4bh**

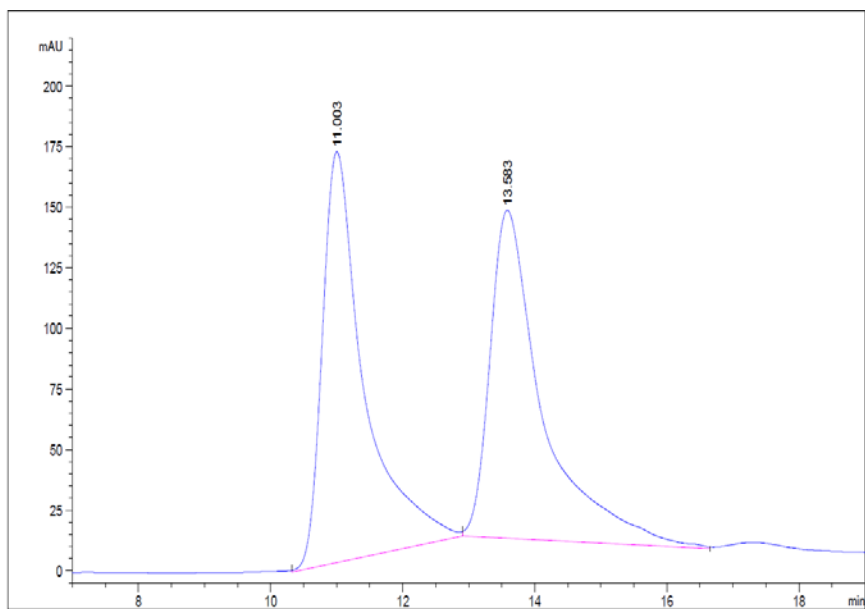

| Peak # | RetTime [min] | Type | Width [min] | Area [mAU*s] | Height [mAU] | Area %  |
|--------|---------------|------|-------------|--------------|--------------|---------|
| 1      | 11.003        | MM R | 0.7355      | 7485.40674   | 169.63321    | 50.0263 |
| 2      | 13.583        | MM R | 0.9202      | 7477.54004   | 135.43274    | 49.9737 |

HPLC chromatogram of chiral product **4bh**

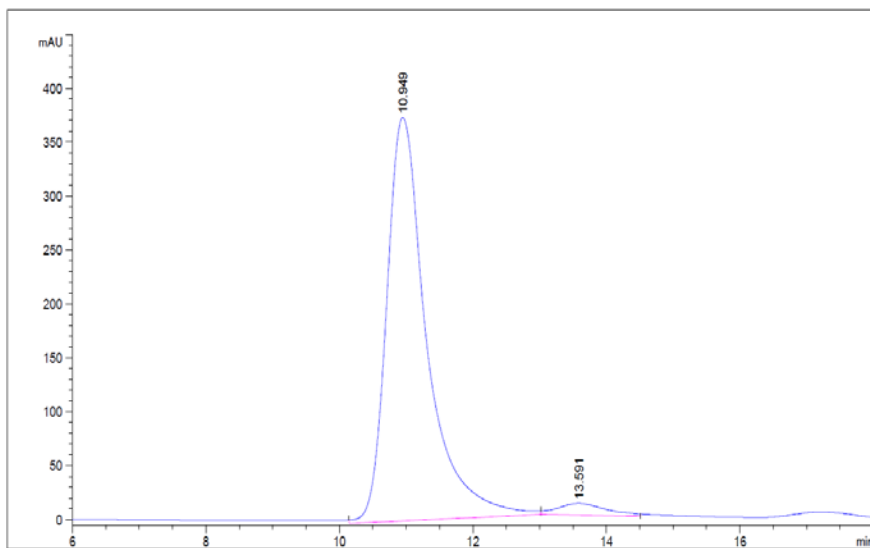

| Peak # | RetTime [min] | Type | Width [min] | Area [mAU*s] | Height [mAU] | Area %  |
|--------|---------------|------|-------------|--------------|--------------|---------|
| 1      | 10.949        | MM R | 0.6953      | 1.56092e4    | 374.14340    | 96.4782 |
| 2      | 13.591        | MM R | 0.8548      | 569.79614    | 11.10919     | 3.5218  |

## X-Ray Crystallographic Data

X-Ray Crystallography Data Crystallographic data for the product **3aa** has been deposited with the Cambridge Crystallographic Data Centre as deposition number CCDC 2264459. These data can be obtained free of charge via [www.ccdc.cam.ac.uk/data\\_request/cif](http://www.ccdc.cam.ac.uk/data_request/cif), or by emailing [data\\_request@ccdc.cam.ac.uk](mailto:data_request@ccdc.cam.ac.uk), or by contacting The Cambridge Crystallographic Data Centre, 12, Union Road, Cambridge CB2 1EZ, UK; fax: +44 1223 336033.

Single crystals of the product **3aa** were obtained by slow evaporation of a solution containing **3aa** in the mixture of petroleum ether and ethyl acetate at room temperature. A suitable crystal was selected and the crystal data and structure refinement results for compound **3aa** are listed in the Table S3.

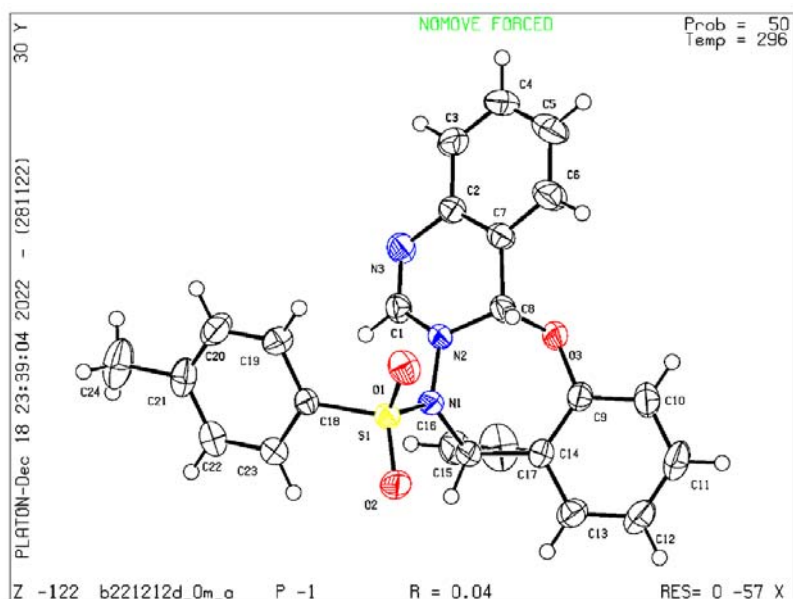

**Figure S1.** ORTEP view of the compound **3aa** with thermal ellipsoids drawn at the 50% probability level

**Table S3.** Crystal data and structure refinement for **3aa**.

|                     |                       |
|---------------------|-----------------------|
| Identification code | <b>3aa</b>            |
| Empirical formula   | $C_{24}H_{21}N_3O_3S$ |
| Formula weight      | 431.50                |
| Temperature/K       | 296(2)                |



|                                             |                                          |
|---------------------------------------------|------------------------------------------|
| Crystal system                              | triclinic                                |
| Space group                                 | P-1                                      |
| a/Å                                         | 8.0853(5)                                |
| b/Å                                         | 10.9301(7)                               |
| c/Å                                         | 13.3531(8)                               |
| $\alpha$ /°                                 | 104.791(2)                               |
| $\beta$ /°                                  | 92.638(2)                                |
| $\gamma$ /°                                 | 111.152(2)                               |
| Volume/Å <sup>3</sup>                       | 1051.52(11)                              |
| Z                                           | 2                                        |
| Density (calculated)                        | 1.363                                    |
| Absorption coefficient                      | 0.186                                    |
| F(000)                                      | 452.0                                    |
| Theta range for data collection             | 0.58 × 0.5 × 0.45                        |
| Index ranges                                | MoK $\alpha$ ( $\lambda$ = 0.71073)      |
| Reflections collected                       | 4.178 to 55.1                            |
| Independent reflections                     | -10 ≤ h ≤ 10, -14 ≤ k ≤ 14, -17 ≤ l ≤ 17 |
| Completeness to theta = 25.242°             | 32847                                    |
| Max. and min. transmission                  | 4845 [Rint = 0.0401, Rsigma = 0.0242]    |
| Data/restraints/parameters                  | 4845/0/281                               |
| Goodness-of-fit on F <sup>2</sup>           | 1.103                                    |
| Final R indexes [I>2sigma(I)]               | R1 = 0.0404, wR2 = 0.1186                |
| Final R indexes [all data]                  | R1 = 0.0505, wR2 = 0.1269                |
| Largest diff. peak/hole / e Å <sup>-3</sup> | 0.37/-0.43                               |

X-Ray Crystallography Data Crystallographic data for the product **4ba** has been deposited with the Cambridge Crystallographic Data Centre as deposition number CCDC 2311978. These data can be obtained free of charge via [www.ccdc.cam.ac.uk/data\\_request/cif](http://www.ccdc.cam.ac.uk/data_request/cif), or by emailing [data\\_request@ccdc.cam.ac.uk](mailto:data_request@ccdc.cam.ac.uk), or by contacting The Cambridge Crystallographic Data Centre, 12, Union Road, Cambridge CB2 1EZ, UK; fax: +44 1223 336033.

Single crystals of the product **4ba** were obtained by slow evaporation of a solution containing **4ba** in the mixture of petroleum ether and ethyl acetate at room temperature. A suitable crystal was selected and the crystal data and structure refinement results for compound **4ba** are listed in the Table S4.

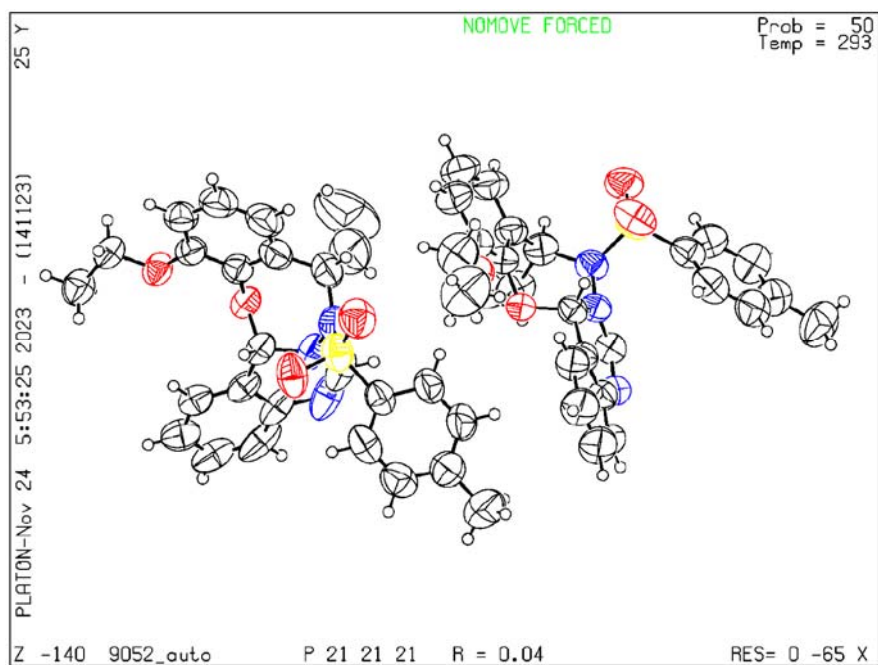

**Figure S2.** ORTEP view of the compound **4ba** with thermal ellipsoids drawn at the 50% probability level

**Table S4.** Crystal data and structure refinement for **4ba**.

|                     |                                                                 |
|---------------------|-----------------------------------------------------------------|
| Identification code | <b>4ba</b>                                                      |
| Empirical formula   | C <sub>26</sub> H <sub>25</sub> N <sub>3</sub> O <sub>4</sub> S |
| Formula weight      | 475.55                                                          |

|                                             |                                                                |
|---------------------------------------------|----------------------------------------------------------------|
| Temperature/K                               | 293(2)                                                         |
| Crystal system                              | orthorhombic                                                   |
| Space group                                 | P2 <sub>1</sub> 2 <sub>1</sub> 2 <sub>1</sub>                  |
| a/Å                                         | 10.53610(10)                                                   |
| b/Å                                         | 17.8100(2)                                                     |
| c/Å                                         | 26.2442(3)                                                     |
| $\alpha$ /°                                 | 90                                                             |
| $\beta$ /°                                  | 90                                                             |
| $\gamma$ /°                                 | 90                                                             |
| Volume/Å <sup>3</sup>                       | 4924.67(9)                                                     |
| Z                                           | 8                                                              |
| $\rho_{\text{calc}}$ /cm <sup>3</sup>       | 1.283                                                          |
| $\mu$ /mm <sup>-1</sup>                     | 1.472                                                          |
| F(000)                                      | 2000.0                                                         |
| Crystal size/mm <sup>3</sup>                | 0.15 × 0.06 × 0.05                                             |
| Radiation                                   | Cu K $\alpha$ ( $\lambda$ = 1.54184)                           |
| 2 $\theta$ range for data collection/°      | 6.736 to 153.512                                               |
| Index ranges                                | -12 ≤ h ≤ 13, -22 ≤ k ≤ 22, -33 ≤ l ≤ 33                       |
| Reflections collected                       | 148366                                                         |
| Independent reflections                     | 10285 [R <sub>int</sub> = 0.0684, R <sub>sigma</sub> = 0.0237] |
| Data/restraints/parameters                  | 10285/9/617                                                    |
| Goodness-of-fit on F <sup>2</sup>           | 1.026                                                          |
| Final R indexes [I ≥ 2 $\sigma$ (I)]        | R <sub>1</sub> = 0.0445, wR <sub>2</sub> = 0.1235              |
| Final R indexes [all data]                  | R <sub>1</sub> = 0.0558, wR <sub>2</sub> = 0.1342              |
| Largest diff. peak/hole / e Å <sup>-3</sup> | 0.35/-0.24                                                     |
| Flack parameter                             | -0.002(6)                                                      |

X-Ray Crystallography Data Crystallographic data for the product **5b** has been deposited with the Cambridge Crystallographic Data Centre as deposition number CCDC 2270182. These data can be obtained free of charge via [www.ccdc.cam.ac.uk/data\\_request/cif](http://www.ccdc.cam.ac.uk/data_request/cif), or by emailing [data\\_request@ccdc.cam.ac.uk](mailto:data_request@ccdc.cam.ac.uk), or by contacting The Cambridge Crystallographic Data Centre, 12, Union Road, Cambridge CB2 1EZ, UK; fax: +44 1223 336033.

Single crystals of the product **5b** were obtained by slow evaporation of a solution containing **5b** in the mixture of petroleum ether and ethyl acetate at room temperature. A suitable crystal was selected and the crystal data and structure refinement results for compound **5b** are listed in the Table S5.

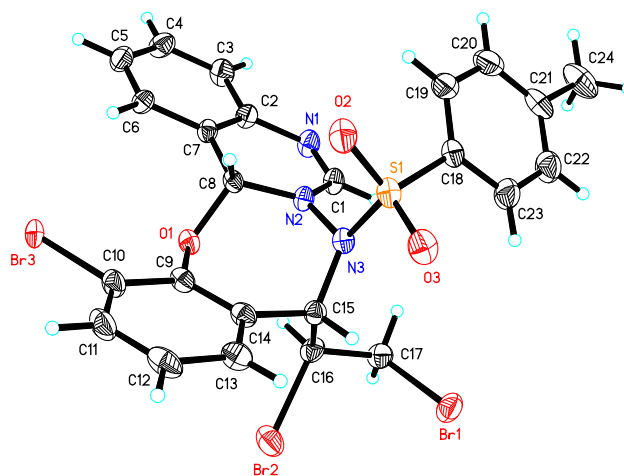

**Figure S5.** ORTEP view of the compound **5b** with thermal ellipsoids drawn at the 50% probability level

**Table S5.** Crystal data and structure refinement for **5b**.

|                     |                                                                                 |
|---------------------|---------------------------------------------------------------------------------|
| Identification code | <b>5b</b>                                                                       |
| Empirical formula   | C <sub>24</sub> H <sub>20</sub> Br <sub>3</sub> N <sub>3</sub> O <sub>3</sub> S |
| Formula weight      | 670.22                                                                          |
| Temperature         | 213(2) K                                                                        |
| Wavelength          | 0.71073                                                                         |

|                                   |                                             |
|-----------------------------------|---------------------------------------------|
| Crystal system                    | Triclinic                                   |
| Space group                       | P -1                                        |
| a/Å                               | a = 10.8989(7)                              |
| b/Å                               | b = 11.4714(7)                              |
| c/Å                               | c = 11.6523(8)                              |
| $\alpha$ /°                       | 1246.00(14)                                 |
| $\beta$ /°                        | 2                                           |
| $\gamma$ /°                       | 1.786 Mg/m <sup>3</sup>                     |
| Absorption coefficient            | 4.972 mm <sup>-1</sup>                      |
| F(000)                            | 660                                         |
| Crystal size                      | 0.180 x 0.150 x 0.130 mm <sup>3</sup>       |
| Theta range for data collection   | 3.059 to 25.496°                            |
| Index ranges                      | -13<=h<=13, -13<=k<=13, -14<=l<=14          |
| Reflections collected             | 22982                                       |
| Independent reflections           | 4620 [R(int) = 0.0698]                      |
| Completeness to theta = 25.242°   | 99.7 %                                      |
| Absorption correction             | Semi-empirical from equivalents             |
| Max. and min. transmission        | 0.7456 and 0.4091                           |
| Refinement method                 | Full-matrix least-squares on F <sup>2</sup> |
| Data / restraints / parameters    | 4620 / 0 / 317                              |
| Goodness-of-fit on F <sup>2</sup> | 1.115                                       |
| Final R indices [I>2sigma(I)]     | R1 = 0.0569, wR2 = 0.1368                   |
| R indices (all data)              | R1 = 0.0823, wR2 = 0.1502                   |
